# Supplementary material for: A new angiographic imaging platform reduces radiation exposure for patients with liver cancer treated with transarterial chemoembolization
Source: PubMed Central journal article supplement — Eur Radiol. 2015 May 9;25(11):3255–62. doi: 10.1007/s00330-015-3717-0 (PMC4595540; doi:10.1007/s00330-015-3717-0), 2015-05-09
Supplement: 330_2015_3717_MOESM1_ESM.pdf [file 330_2015_3717_MOESM1_ESM.pdf]

**Study:** EMBOL - CHEMOTHERAPEUTIC (#12918225)  
**Completion Flag:** COMPLETE  
Complete X-Ray Radiation Dose Structured Report  
**Verification Flag:** UNVERIFIED

---

## X-Ray Radiation Dose Report

Concept Modifier: Procedure reported [[Annex 1](#)]  
Observation Context: Observer Type = Device (121007, DCM)  
Observation Context: Device Observer UID = 1.3.46.670589.28.961600801528  
Observation Context: Device Observer Model Name = "Allura Xper"  
Observation Context: Device Observer Serial Number = "1"  
Observation Context: Scope of Accumulation [[Annex 2](#)]

### Accumulated X-Ray Dose Data

Concept Modifier: Acquisition Plane = Single Plane (113622, DCM)

**Reference Point Definition:**

15cm below BeamIsocenter

**Dose Area Product Total:**

0.02716293575993 Gy.m2

**Dose (RP) Total:**

0.94970385674931 Gy

**Fluoro Dose Area Product Total:**

0.00999604452677 Gy.m2

**Fluoro Dose (RP) Total:**

0.41860651974288 Gy

**Total Fluoro Time:**

1506 s

**Acquisition Dose Area Product Total:**

0.01716689123316 Gy.m2

**Acquisition Dose (RP) Total:**

0.53109733700642 Gy

**Total Acquisition Time:**

105.077999999999 s

**Total Number of Radiographic Frames:**

1141 1

**Height of System:**

1075 mm

**Focal Spot to ISO Center:**

810 mm

### Irradiation Event X-Ray Data

Concept Modifier: Acquisition Plane = Single Plane (113622, DCM)

**DateTime Started:**

2014-03-13 15:25:13

**Irradiation Event Type:**

Fluoroscopy (P5-06000, SRT)

**Reference Point Definition:**

15cm below BeamIsocenter

**Irradiation Event UID:**

1.3.46.670589.28.961600801528.20140313152513023.1

**Dose Area Product:**

2.0113789815E-06 Gy.m2

**Dose (RP):**

4.5913682277E-05 Gy

**Positioner Primary Angle:**

-1 deg

**Positioner Secondary Angle:**

0 deg

## **X-Ray Filters**

**X-Ray Filter Type:**

Strip filter (113650, DCM)

**X-Ray Filter Material:**

Copper or Copper compound (C-127F9, SRT)

**X-Ray Filter Thickness Minimum:**

0.4 mm

**X-Ray Filter Thickness Maximum:**

0.4 mm

## **X-Ray Filters**

**X-Ray Filter Type:**

Strip filter (113650, DCM)

**X-Ray Filter Material:**

Aluminum or Aluminum compound (C-120F9, SRT)

**X-Ray Filter Thickness Minimum:**

1 mm

**X-Ray Filter Thickness Maximum:**

1 mm

**Fluoro Mode:**

Pulsed (113631, DCM)

**Pulse Rate:**

15 {pulse}/s

**Number of Pulses:**

9 1

**X-Ray Tube Current:**

53.6 mA

**Distance Source to Isocenter:**

810 mm

**KVP:**

83.11 kV

**Pulse Width:**

4 ms

**Irradiation Duration:**

0.6 s

**Patient Table Relationship:**

headfirst (F-10470, SRT)

**Patient Orientation:**

recumbent (F-10450, SRT)

Concept Modifier: Patient Orientation Modifier = supine (F-10340, SRT)

**Table Longitudinal Position:**

20.6 mm

**Table Lateral Position:**

1597.4 mm

**Table Head Tilt Angle:**

0 deg

**Table Cradle Tilt Angle:**

0 deg

**Target Region:**

Abdomen (T-D400, SRT)

**Number of Frames:**

9 1

**SubImages per Frame:**

1 1

**Wedges and Shutters****Bottom Shutter:**

187 mm

**Left Shutter:**

147.5 mm

**Right Shutter:**

147.5 mm

**Top Shutter:**

187 mm

**Beam Position****Longitudinal Beam Position:**

851.000000000000 mm

**Beam Angle:**

0 deg

**Table Height Position:**

878 mm

**Irradiation Event X-Ray Data**

Concept Modifier: Acquisition Plane = Single Plane (113622, DCM)

**DateTime Started:**

2014-03-13 15:25:20

**Irradiation Event Type:**

Fluoroscopy (P5-06000, SRT)

**Reference Point Definition:**

15cm below BeamIsocenter

**Irradiation Event UID:**

1.3.46.670589.28.961600801528.20140313152519382.1

**Dose Area Product:**

1.7053880089E-06 Gy.m2

**Dose (RP):**

3.4435261707E-05 Gy

**Positioner Primary Angle:**

-1 deg

**Positioner Secondary Angle:**

0 deg

## **X-Ray Filters**

**X-Ray Filter Type:**

Strip filter (113650, DCM)

**X-Ray Filter Material:**

Copper or Copper compound (C-127F9, SRT)

**X-Ray Filter Thickness Minimum:**

0.4 mm

**X-Ray Filter Thickness Maximum:**

0.4 mm

## **X-Ray Filters**

**X-Ray Filter Type:**

Strip filter (113650, DCM)

**X-Ray Filter Material:**

Aluminum or Aluminum compound (C-120F9, SRT)

**X-Ray Filter Thickness Minimum:**

1 mm

**X-Ray Filter Thickness Maximum:**

1 mm

**Fluoro Mode:**

Pulsed (113631, DCM)

**Pulse Rate:**

15 {pulse}/s

**Number of Pulses:**

7 1

**X-Ray Tube Current:**

53.5 mA

**Distance Source to Isocenter:**

810 mm

**KVP:**

83.33 kV

**Pulse Width:**

4 ms

**Irradiation Duration:**

0.466 s

**Patient Table Relationship:**

headfirst (F-10470, SRT)

**Patient Orientation:**

recumbent (F-10450, SRT)

Concept Modifier: Patient Orientation Modifier = supine (F-10340, SRT)

**Table Longitudinal Position:**

48.6 mm

**Table Lateral Position:**

1597.300000000000 mm

**Table Head Tilt Angle:**

0 deg

**Table Cradle Tilt Angle:**

0 deg

**Target Region:**

Abdomen (T-D400, SRT)

**Number of Frames:**

7 1

**SubImages per Frame:**

1 1

**Wedges and Shutters****Bottom Shutter:**

187 mm

**Left Shutter:**

147.5 mm

**Right Shutter:**

147.5 mm

**Top Shutter:**

187 mm

**Beam Position****Longitudinal Beam Position:**

851.000000000000 mm

**Beam Angle:**

0 deg

**Table Height Position:**

878 mm

**Irradiation Event X-Ray Data**

Concept Modifier: Acquisition Plane = Single Plane (113622, DCM)

**DateTime Started:**

2014-03-13 15:25:47

**Irradiation Event Type:**

Fluoroscopy (P5-06000, SRT)

**Reference Point Definition:**

15cm below BeamIsocenter

**Irradiation Event UID:**

1.3.46.670589.28.961600801528.20140313152546975.1

**Dose Area Product:**

2.8220905977E-06 Gy.m2

**Dose (RP):**

5.9687786960E-05 Gy

**Positioner Primary Angle:**

-1 deg

**Positioner Secondary Angle:**

0 deg

## **X-Ray Filters**

**X-Ray Filter Type:**

Strip filter (113650, DCM)

**X-Ray Filter Material:**

Copper or Copper compound (C-127F9, SRT)

**X-Ray Filter Thickness Minimum:**

0.4 mm

**X-Ray Filter Thickness Maximum:**

0.4 mm

## **X-Ray Filters**

**X-Ray Filter Type:**

Strip filter (113650, DCM)

**X-Ray Filter Material:**

Aluminum or Aluminum compound (C-120F9, SRT)

**X-Ray Filter Thickness Minimum:**

1 mm

**X-Ray Filter Thickness Maximum:**

1 mm

**Fluoro Mode:**

Pulsed (113631, DCM)

**Pulse Rate:**

15 {pulse}/s

**Number of Pulses:**

12 1

**X-Ray Tube Current:**

55.6 mA

**Distance Source to Isocenter:**

810 mm

**KVP:**

82.45 kV

**Pulse Width:**

4 ms

**Irradiation Duration:**

0.7989999999999999 s

**Patient Table Relationship:**

headfirst (F-10470, SRT)

**Patient Orientation:**

recumbent (F-10450, SRT)

Concept Modifier: Patient Orientation Modifier = supine (F-10340, SRT)

**Table Longitudinal Position:**

73.9 mm

**Table Lateral Position:**

1696.300000000000 mm

**Table Head Tilt Angle:**

0 deg

**Table Cradle Tilt Angle:**

0 deg

**Target Region:**

Abdomen (T-D400, SRT)

**Number of Frames:**

12 1

**SubImages per Frame:**

1 1

**Wedges and Shutters****Bottom Shutter:**

185 mm

**Left Shutter:**

146 mm

**Right Shutter:**

146 mm

**Top Shutter:**

185 mm

**Beam Position****Longitudinal Beam Position:**

851.000000000000 mm

**Beam Angle:**

0 deg

**Table Height Position:**

909 mm

**Irradiation Event X-Ray Data**

Concept Modifier: Acquisition Plane = Single Plane (113622, DCM)

**DateTime Started:**

2014-03-13 15:25:53

**Irradiation Event Type:**

Fluoroscopy (P5-06000, SRT)

**Reference Point Definition:**

15cm below BeamIsocenter

**Irradiation Event UID:**

1.3.46.670589.28.961600801528.20140313152552772.1

**Dose Area Product:**

2.5338253173E-06 Gy.m2

**Dose (RP):**

5.7392102846E-05 Gy

**Positioner Primary Angle:**

-1 deg

**Positioner Secondary Angle:**

0 deg

## **X-Ray Filters**

**X-Ray Filter Type:**

Strip filter (113650, DCM)

**X-Ray Filter Material:**

Copper or Copper compound (C-127F9, SRT)

**X-Ray Filter Thickness Minimum:**

0.4 mm

**X-Ray Filter Thickness Maximum:**

0.4 mm

## **X-Ray Filters**

**X-Ray Filter Type:**

Strip filter (113650, DCM)

**X-Ray Filter Material:**

Aluminum or Aluminum compound (C-120F9, SRT)

**X-Ray Filter Thickness Minimum:**

1 mm

**X-Ray Filter Thickness Maximum:**

1 mm

**Fluoro Mode:**

Pulsed (113631, DCM)

**Pulse Rate:**

15 {pulse}/s

**Number of Pulses:**

11 1

**X-Ray Tube Current:**

55.3 mA

**Distance Source to Isocenter:**

810 mm



**KVP:**

82.96 kV

**Pulse Width:**

4 ms

**Irradiation Duration:**

0.733 s

**Patient Table Relationship:**

headfirst (F-10470, SRT)

**Patient Orientation:**

recumbent (F-10450, SRT)

Concept Modifier: Patient Orientation Modifier = supine (F-10340, SRT)

**Table Longitudinal Position:**

73.9 mm

**Table Lateral Position:**

1696.300000000000 mm

**Table Head Tilt Angle:**

0 deg

**Table Cradle Tilt Angle:**

0 deg

**Target Region:**

Abdomen (T-D400, SRT)

**Number of Frames:**

11 1

**SubImages per Frame:**

1 1

**Wedges and Shutters****Bottom Shutter:**

172 mm

**Left Shutter:**

146 mm

**Right Shutter:**

146 mm

**Top Shutter:**

172 mm

**Beam Position****Longitudinal Beam Position:**

851.000000000000 mm

**Beam Angle:**

0 deg

**Table Height Position:**

909 mm

**Irradiation Event X-Ray Data**

Concept Modifier: Acquisition Plane = Single Plane (113622, DCM)

**DateTime Started:**

2014-03-13 15:28:25

**Irradiation Event Type:**

Fluoroscopy (P5-06000, SRT)

**Reference Point Definition:**

15cm below BeamIsocenter

**Irradiation Event UID:**

1.3.46.670589.28.961600801528.20140313152825115.1

**Dose Area Product:**

2.5073205604E-06 Gy.m2

**Dose (RP):**

6.1983471074E-05 Gy

**Positioner Primary Angle:**

-1 deg

**Positioner Secondary Angle:**

0 deg

## **X-Ray Filters**

**X-Ray Filter Type:**

Strip filter (113650, DCM)

**X-Ray Filter Material:**

Copper or Copper compound (C-127F9, SRT)

**X-Ray Filter Thickness Minimum:**

0.4 mm

**X-Ray Filter Thickness Maximum:**

0.4 mm

## **X-Ray Filters**

**X-Ray Filter Type:**

Strip filter (113650, DCM)

**X-Ray Filter Material:**

Aluminum or Aluminum compound (C-120F9, SRT)

**X-Ray Filter Thickness Minimum:**

1 mm

**X-Ray Filter Thickness Maximum:**

1 mm

**Fluoro Mode:**

Pulsed (113631, DCM)

**Pulse Rate:**

15 {pulse}/s

**Number of Pulses:**

10 1

**X-Ray Tube Current:**

66.6 mA

**Distance Source to Isocenter:**

810 mm

**KVP:**

82.4 kV

**Pulse Width:**

4 ms

**Irradiation Duration:**

0.6659999999999999 s

**Patient Table Relationship:**

headfirst (F-10470, SRT)

**Patient Orientation:**

recumbent (F-10450, SRT)

Concept Modifier: Patient Orientation Modifier = supine (F-10340, SRT)

**Table Longitudinal Position:**

73.9 mm

**Table Lateral Position:**

1696.300000000000 mm

**Table Head Tilt Angle:**

0 deg

**Table Cradle Tilt Angle:**

0 deg

**Target Region:**

Abdomen (T-D400, SRT)

**Number of Frames:**

10 1

**SubImages per Frame:**

1 1

**Wedges and Shutters****Bottom Shutter:**

172 mm

**Left Shutter:**

136 mm

**Right Shutter:**

136 mm

**Top Shutter:**

172 mm

**Beam Position****Longitudinal Beam Position:**

894 mm

**Beam Angle:**

0 deg

**Table Height Position:**

909 mm

**Irradiation Event X-Ray Data**

Concept Modifier: Acquisition Plane = Single Plane (113622, DCM)

**DateTime Started:**

2014-03-13 15:28:29

**Irradiation Event Type:**

Fluoroscopy (P5-06000, SRT)

**Reference Point Definition:**

15cm below BeamIsocenter

**Irradiation Event UID:**

1.3.46.670589.28.961600801528.20140313152829131.1

**Dose Area Product:**

6.0440157825E-06 Gy.m2

**Dose (RP):**

0.00031221303948 Gy

**Positioner Primary Angle:**

-1 deg

**Positioner Secondary Angle:**

0 deg

## **X-Ray Filters**

**X-Ray Filter Type:**

Strip filter (113650, DCM)

**X-Ray Filter Material:**

Copper or Copper compound (C-127F9, SRT)

**X-Ray Filter Thickness Minimum:**

0.4 mm

**X-Ray Filter Thickness Maximum:**

0.4 mm

## **X-Ray Filters**

**X-Ray Filter Type:**

Strip filter (113650, DCM)

**X-Ray Filter Material:**

Aluminum or Aluminum compound (C-120F9, SRT)

**X-Ray Filter Thickness Minimum:**

1 mm

**X-Ray Filter Thickness Maximum:**

1 mm

**Fluoro Mode:**

Pulsed (113631, DCM)

**Pulse Rate:**

15 {pulse}/s

**Number of Pulses:**

45 1

**X-Ray Tube Current:**

62.8 mA

**Distance Source to Isocenter:**

810 mm

**KVP:**

86.24 kV

**Pulse Width:**

4 ms

**Irradiation Duration:**

3 s

**Patient Table Relationship:**

headfirst (F-10470, SRT)

**Patient Orientation:**

recumbent (F-10450, SRT)

Concept Modifier: Patient Orientation Modifier = supine (F-10340, SRT)

**Table Longitudinal Position:**

73.9 mm

**Table Lateral Position:**

1696.300000000000 mm

**Table Head Tilt Angle:**

0 deg

**Table Cradle Tilt Angle:**

0 deg

**Target Region:**

Abdomen (T-D400, SRT)

**Number of Frames:**

45 1

**SubImages per Frame:**

1 1

**Wedges and Shutters****Bottom Shutter:**

130 mm

**Left Shutter:**

84 mm

**Right Shutter:**

84 mm

**Top Shutter:**

130 mm

**Beam Position****Longitudinal Beam Position:**

890 mm

**Beam Angle:**

0 deg

**Table Height Position:**

909 mm

**Irradiation Event X-Ray Data**

Concept Modifier: Acquisition Plane = Single Plane (113622, DCM)

**DateTime Started:**

2014-03-13 15:28:33

**Irradiation Event Type:**

Fluoroscopy (P5-06000, SRT)

**Reference Point Definition:**

15cm below BeamIsocenter

**Acquired Image:**

[XA image](#)

**Irradiation Event UID:**

1.3.46.670589.28.961600801528.20140313152833428.1

**Dose Area Product:**

3.0430121381E-06 Gy.m2

**Dose (RP):**

0.00014921946740 Gy

**Positioner Primary Angle:**

-1 deg

**Positioner Secondary Angle:**

0 deg

## X-Ray Filters

**X-Ray Filter Type:**

Strip filter (113650, DCM)

**X-Ray Filter Material:**

Copper or Copper compound (C-127F9, SRT)

**X-Ray Filter Thickness Minimum:**

0.4 mm

**X-Ray Filter Thickness Maximum:**

0.4 mm

## X-Ray Filters

**X-Ray Filter Type:**

Strip filter (113650, DCM)

**X-Ray Filter Material:**

Aluminum or Aluminum compound (C-120F9, SRT)

**X-Ray Filter Thickness Minimum:**

1 mm

**X-Ray Filter Thickness Maximum:**

1 mm

**Fluoro Mode:**

Pulsed (113631, DCM)

**Pulse Rate:**

15 {pulse}/s

**Number of Pulses:**

22 1

**X-Ray Tube Current:**

62.5 mA

**Distance Source to Isocenter:**

810 mm

**KVP:**

86.63 kV

**Pulse Width:**

4 ms

**Distance Source to Detector:**

1088 mm

**Irradiation Duration:**

1.466 s

**Patient Table Relationship:**

headfirst (F-10470, SRT)

**Patient Orientation:**

recumbent (F-10450, SRT)

Concept Modifier: Patient Orientation Modifier = supine (F-10340, SRT)

**Table Longitudinal Position:**

73.9 mm

**Table Lateral Position:**

1696.300000000000 mm

**Table Head Tilt Angle:**

0 deg

**Table Cradle Tilt Angle:**

0 deg

**Target Region:**

Abdomen (T-D400, SRT)

**Number of Frames:**

22 1

**SubImages per Frame:**

1 1

**Wedges and Shutters****Bottom Shutter:**

130 mm

**Left Shutter:**

84 mm

**Right Shutter:**

84 mm

**Top Shutter:**

130 mm

**Beam Position****Longitudinal Beam Position:**

890 mm

**Beam Angle:**

0 deg

**Table Height Position:**

909 mm

## Irradiation Event X-Ray Data

Concept Modifier: Acquisition Plane = Single Plane (113622, DCM)

**Date Time Started:**

2014-03-13 15:30:18

**Irradiation Event Type:**

Fluoroscopy (P5-06000, SRT)

**Reference Point Definition:**

15cm below BeamIsocenter

**Irradiation Event UID:**

1.3.46.670589.28.961600801528.20140313153017505.1

**Dose Area Product:**

4.9886122212E-07 Gy.m2

**Dose (RP):**

2.5252525252E-05 Gy

**Positioner Primary Angle:**

-1 deg

**Positioner Secondary Angle:**

0 deg

### X-Ray Filters

**X-Ray Filter Type:**

Strip filter (113650, DCM)

**X-Ray Filter Material:**

Copper or Copper compound (C-127F9, SRT)

**X-Ray Filter Thickness Minimum:**

0.4 mm

**X-Ray Filter Thickness Maximum:**

0.4 mm

### X-Ray Filters

**X-Ray Filter Type:**

Strip filter (113650, DCM)

**X-Ray Filter Material:**

Aluminum or Aluminum compound (C-120F9, SRT)

**X-Ray Filter Thickness Minimum:**

1 mm

**X-Ray Filter Thickness Maximum:**

1 mm

**Fluoro Mode:**

Pulsed (113631, DCM)

**Pulse Rate:**

15 {pulse}/s

**Number of Pulses:**



3 1

**X-Ray Tube Current:**

79.6 mA

**Distance Source to Isocenter:**

810 mm

**KVP:**

85.67 kV

**Pulse Width:**

4 ms

**Irradiation Duration:**

0.199 s

**Patient Table Relationship:**

headfirst (F-10470, SRT)

**Patient Orientation:**

recumbent (F-10450, SRT)

Concept Modifier: Patient Orientation Modifier = supine (F-10340, SRT)

**Table Longitudinal Position:**

36.9000000000000 mm

**Table Lateral Position:**

1696.4 mm

**Table Head Tilt Angle:**

0 deg

**Table Cradle Tilt Angle:**

0 deg

**Target Region:**

Abdomen (T-D400, SRT)

**Number of Frames:**

3 1

**SubImages per Frame:**

1 1

## Wedges and Shutters

**Bottom Shutter:**

130 mm

**Left Shutter:**

84 mm

**Right Shutter:**

84 mm

**Top Shutter:**

130 mm

## Beam Position

**Longitudinal Beam Position:**

890 mm

**Beam Angle:**

0 deg

**Table Height Position:**

909 mm

## Irradiation Event X-Ray Data

Concept Modifier: Acquisition Plane = Single Plane (113622, DCM)

**DateTime Started:**

2014-03-13 15:30:20

**Irradiation Event Type:**

Fluoroscopy (P5-06000, SRT)

**Reference Point Definition:**

15cm below BeamIsocenter

**Irradiation Event UID:**

1.3.46.670589.28.961600801528.20140313153020224.1

**Dose Area Product:**

1.1292890652E-05 Gy.m2

**Dose (RP):**

0.00046831955922 Gy

**Positioner Primary Angle:**

-1 deg

**Positioner Secondary Angle:**

0 deg

### X-Ray Filters

**X-Ray Filter Type:**

Strip filter (113650, DCM)

**X-Ray Filter Material:**

Copper or Copper compound (C-127F9, SRT)

**X-Ray Filter Thickness Minimum:**

0.4 mm

**X-Ray Filter Thickness Maximum:**

0.4 mm

### X-Ray Filters

**X-Ray Filter Type:**

Strip filter (113650, DCM)

**X-Ray Filter Material:**

Aluminum or Aluminum compound (C-120F9, SRT)

**X-Ray Filter Thickness Minimum:**

1 mm

**X-Ray Filter Thickness Maximum:**

1 mm

**Fluoro Mode:**

Pulsed (113631, DCM)

**Pulse Rate:**

15 {pulse}/s

**Number of Pulses:**

58 1

**X-Ray Tube Current:**

62 mA

**Distance Source to Isocenter:**

810 mm

**KVP:**

93.01 kV

**Pulse Width:**

4 ms

**Irradiation Duration:**

3.866 s

**Patient Table Relationship:**

headfirst (F-10470, SRT)

**Patient Orientation:**

recumbent (F-10450, SRT)

Concept Modifier: Patient Orientation Modifier = supine (F-10340, SRT)

**Table Longitudinal Position:**

36.9000000000000 mm

**Table Lateral Position:**

1696.4 mm

**Table Head Tilt Angle:**

0 deg

**Table Cradle Tilt Angle:**

0 deg

**Target Region:**

Abdomen (T-D400, SRT)

**Number of Frames:**

58 1

**SubImages per Frame:**

1 1

**Wedges and Shutters****Bottom Shutter:**

170.5 mm

**Left Shutter:**

101 mm

**Right Shutter:**

101 mm

**Top Shutter:**

170.5 mm

**Beam Position****Longitudinal Beam Position:**

891 mm

**Beam Angle:**

0 deg  
**Table Height Position:**  
909 mm

## Irradiation Event X-Ray Data

Concept Modifier: Acquisition Plane = Single Plane (113622, DCM)

**DateTime Started:**  
2014-03-13 15:31:44  
**Irradiation Event Type:**  
Fluoroscopy (P5-06000, SRT)  
**Reference Point Definition:**  
15cm below BeamIsocenter  
**Irradiation Event UID:**  
1.3.46.670589.28.961600801528.20140313153143380.1  
**Dose Area Product:**  
2.0623399652E-05 Gy.m2  
**Dose (RP):**  
0.00070018365472 Gy  
**Positioner Primary Angle:**  
-18.5 deg  
**Positioner Secondary Angle:**  
-0.03 deg

### X-Ray Filters

**X-Ray Filter Type:**  
Strip filter (113650, DCM)  
**X-Ray Filter Material:**  
Copper or Copper compound (C-127F9, SRT)  
**X-Ray Filter Thickness Minimum:**  
0.4 mm  
**X-Ray Filter Thickness Maximum:**  
0.4 mm

### X-Ray Filters

**X-Ray Filter Type:**  
Strip filter (113650, DCM)  
**X-Ray Filter Material:**  
Aluminum or Aluminum compound (C-120F9, SRT)  
**X-Ray Filter Thickness Minimum:**  
1 mm  
**X-Ray Filter Thickness Maximum:**  
1 mm  
**Fluoro Mode:**  
Pulsed (113631, DCM)  
**Pulse Rate:**

15 {pulse}/s

**Number of Pulses:**

81 1

**X-Ray Tube Current:**

64 mA

**Distance Source to Isocenter:**

810 mm

**KVP:**

88.62 kV

**Pulse Width:**

4 ms

**Irradiation Duration:**

5.4 s

**Patient Table Relationship:**

headfirst (F-10470, SRT)

**Patient Orientation:**

recumbent (F-10450, SRT)

Concept Modifier: Patient Orientation Modifier = supine (F-10340, SRT)

**Table Longitudinal Position:**

7.9 mm

**Table Lateral Position:**

1696.500000000000 mm

**Table Head Tilt Angle:**

0 deg

**Table Cradle Tilt Angle:**

0 deg

**Target Region:**

Abdomen (T-D400, SRT)

**Number of Frames:**

81 1

**SubImages per Frame:**

1 1

## Wedges and Shutters

**Bottom Shutter:**

170.5 mm

**Left Shutter:**

101 mm

**Right Shutter:**

101 mm

**Top Shutter:**

170.5 mm

## Beam Position

**Longitudinal Beam Position:**

1065 mm

**Beam Angle:**

0 deg

**Table Height Position:**

909 mm

## Irradiation Event X-Ray Data

Concept Modifier: Acquisition Plane = Single Plane (113622, DCM)

**DateTime Started:**

2014-03-13 15:33:35

**Irradiation Event Type:**

Fluoroscopy (P5-06000, SRT)

**Reference Point Definition:**

15cm below BeamIsocenter

**Irradiation Event UID:**

1.3.46.670589.28.961600801528.20140313153334458.1

**Dose Area Product:**

2.8568258668E-06 Gy.m2

**Dose (RP):**

8.2644628099E-05 Gy

**Positioner Primary Angle:**

-11.700000000000 deg

**Positioner Secondary Angle:**

-0.02 deg

### X-Ray Filters

**X-Ray Filter Type:**

Strip filter (113650, DCM)

**X-Ray Filter Material:**

Copper or Copper compound (C-127F9, SRT)

**X-Ray Filter Thickness Minimum:**

0.4 mm

**X-Ray Filter Thickness Maximum:**

0.4 mm

### X-Ray Filters

**X-Ray Filter Type:**

Strip filter (113650, DCM)

**X-Ray Filter Material:**

Aluminum or Aluminum compound (C-120F9, SRT)

**X-Ray Filter Thickness Minimum:**

1 mm

**X-Ray Filter Thickness Maximum:**

1 mm

**Fluoro Mode:**

Pulsed (113631, DCM)

**Pulse Rate:**

15 {pulse}/s

**Number of Pulses:**

11 1

**X-Ray Tube Current:**

64.7 mA

**Distance Source to Isocenter:**

810 mm

**KVP:**

87.55 kV

**Pulse Width:**

4 ms

**Irradiation Duration:**

0.733 s

**Patient Table Relationship:**

headfirst (F-10470, SRT)

**Patient Orientation:**

recumbent (F-10450, SRT)

Concept Modifier: Patient Orientation Modifier = supine (F-10340, SRT)

**Table Longitudinal Position:**

7.9 mm

**Table Lateral Position:**

1696.500000000000 mm

**Table Head Tilt Angle:**

0 deg

**Table Cradle Tilt Angle:**

0 deg

**Target Region:**

Abdomen (T-D400, SRT)

**Number of Frames:**

11 1

**SubImages per Frame:**

1 1

**Wedges and Shutters****Bottom Shutter:**

170.5 mm

**Left Shutter:**

116 mm

**Right Shutter:**

116 mm

**Top Shutter:**

170.5 mm

**Beam Position****Longitudinal Beam Position:**

898 mm

**Beam Angle:**

0 deg

**Table Height Position:**

909 mm

## Irradiation Event X-Ray Data

Concept Modifier: Acquisition Plane = Single Plane (113622, DCM)

**DateTime Started:**

2014-03-13 15:36:16

**Irradiation Event Type:**

Fluoroscopy (P5-06000, SRT)

**Reference Point Definition:**

15cm below BeamIsocenter

**Irradiation Event UID:**

1.3.46.670589.28.961600801528.20140313153615458.1

**Dose Area Product:**

1.8987401453E-06 Gy.m2

**Dose (RP):**

0.00011019283746 Gy

**Positioner Primary Angle:**

-23.3 deg

**Positioner Secondary Angle:**

-0.04 deg

### X-Ray Filters

**X-Ray Filter Type:**

Strip filter (113650, DCM)

**X-Ray Filter Material:**

Copper or Copper compound (C-127F9, SRT)

**X-Ray Filter Thickness Minimum:**

0.4 mm

**X-Ray Filter Thickness Maximum:**

0.4 mm

### X-Ray Filters

**X-Ray Filter Type:**

Strip filter (113650, DCM)

**X-Ray Filter Material:**

Aluminum or Aluminum compound (C-120F9, SRT)

**X-Ray Filter Thickness Minimum:**

1 mm

**X-Ray Filter Thickness Maximum:**

1 mm

**Fluoro Mode:**



Pulsed (113631, DCM)

**Pulse Rate:**

15 {pulse}/s

**Number of Pulses:**

16 1

**X-Ray Tube Current:**

52.1 mA

**Distance Source to Isocenter:**

810 mm

**KVP:**

90.08 kV

**Pulse Width:**

4 ms

**Irradiation Duration:**

1.066 s

**Patient Table Relationship:**

headfirst (F-10470, SRT)

**Patient Orientation:**

recumbent (F-10450, SRT)

Concept Modifier: Patient Orientation Modifier = supine (F-10340, SRT)

**Table Longitudinal Position:**

44.0000000000000 mm

**Table Lateral Position:**

1713.4 mm

**Table Head Tilt Angle:**

0 deg

**Table Cradle Tilt Angle:**

0 deg

**Target Region:**

Abdomen (T-D400, SRT)

**Number of Frames:**

16 1

**SubImages per Frame:**

1 1

## Wedges and Shutters

**Bottom Shutter:**

170.5 mm

**Left Shutter:**

62 mm

**Right Shutter:**

62 mm

**Top Shutter:**

170.5 mm

## Beam Position

**Longitudinal Beam Position:**

852.000000000000 mm

**Beam Angle:**

0 deg

**Table Height Position:**

909 mm

## Irradiation Event X-Ray Data

Concept Modifier: Acquisition Plane = Single Plane (113622, DCM)

**DateTime Started:**

2014-03-13 15:36:22

**Irradiation Event Type:**

Stationary Acquisition (113611, DCM)

**Reference Point Definition:**

15cm below BeamIsocenter

**Acquired Image:**

[XA image](#)

**Irradiation Event UID:**

1.3.46.670589.28.961600801528.20140313153621427.1

**Dose Area Product:**

0.00024097459802 Gy.m2

**Dose (RP):**

0.01421946740128 Gy

**Positioner Primary Angle:**

-23.3 deg

**Positioner Secondary Angle:**

-0.04 deg

### X-Ray Filters

**X-Ray Filter Type:**

Strip filter (113650, DCM)

**X-Ray Filter Material:**

Copper or Copper compound (C-127F9, SRT)

**X-Ray Filter Thickness Minimum:**

0.1 mm

**X-Ray Filter Thickness Maximum:**

0.1 mm

### X-Ray Filters

**X-Ray Filter Type:**

Strip filter (113650, DCM)

**X-Ray Filter Material:**

Aluminum or Aluminum compound (C-120F9, SRT)

**X-Ray Filter Thickness Minimum:**

1 mm

**X-Ray Filter Thickness Maximum:**

1 mm

**X-Ray Tube Current:**

332 mA

**Distance Source to Isocenter:**

810 mm

**KVP:**

80 kV

**Pulse Width:**

45 ms

**Distance Source to Detector:**

1034 mm

**Irradiation Duration:**

6.333 s

**Patient Table Relationship:**

headfirst (F-10470, SRT)

**Patient Orientation:**

recumbent (F-10450, SRT)

Concept Modifier: Patient Orientation Modifier = supine (F-10340, SRT)

**Table Longitudinal Position:**

44.00000000000000 mm

**Table Lateral Position:**

1713.4 mm

**Table Head Tilt Angle:**

0 deg

**Table Cradle Tilt Angle:**

0 deg

**Target Region:**

Abdomen (T-D400, SRT)

**Number of Frames:**

17 1

**SubImages per Frame:**

1 1

**Wedges and Shutters****Bottom Shutter:**

170.5 mm

**Left Shutter:**

62 mm

**Right Shutter:**

62 mm

**Top Shutter:**

170.5 mm

**Beam Position****Longitudinal Beam Position:**

852.000000000000 mm

**Beam Angle:**

0 deg

**Table Height Position:**

909 mm

## Irradiation Event X-Ray Data

Concept Modifier: Acquisition Plane = Single Plane (113622, DCM)

**DateTime Started:**

2014-03-13 15:37:56

**Irradiation Event Type:**

Fluoroscopy (P5-06000, SRT)

**Reference Point Definition:**

15cm below BeamIsocenter

**Irradiation Event UID:**

1.3.46.670589.28.961600801528.20140313153755520.1

**Dose Area Product:**

6.0421970450E-05 Gy.m2

**Dose (RP):**

0.00252525252525 Gy

**Positioner Primary Angle:**

-0.9 deg

**Positioner Secondary Angle:**

0 deg

### X-Ray Filters

**X-Ray Filter Type:**

Strip filter (113650, DCM)

**X-Ray Filter Material:**

Copper or Copper compound (C-127F9, SRT)

**X-Ray Filter Thickness Minimum:**

0.4 mm

**X-Ray Filter Thickness Maximum:**

0.4 mm

### X-Ray Filters

**X-Ray Filter Type:**

Strip filter (113650, DCM)

**X-Ray Filter Material:**

Aluminum or Aluminum compound (C-120F9, SRT)

**X-Ray Filter Thickness Minimum:**

1 mm

**X-Ray Filter Thickness Maximum:**

1 mm

**Fluoro Mode:**

Pulsed (113631, DCM)

**Pulse Rate:**

15 {pulse}/s

**Number of Pulses:**

297 1

**X-Ray Tube Current:**

59.1 mA

**Distance Source to Isocenter:**

810 mm

**KVP:**

91.08 kV

**Pulse Width:**

4 ms

**Irradiation Duration:**

19.799 s

**Patient Table Relationship:**

headfirst (F-10470, SRT)

**Patient Orientation:**

recumbent (F-10450, SRT)

Concept Modifier: Patient Orientation Modifier = supine (F-10340, SRT)

**Table Longitudinal Position:**

-22.2 mm

**Table Lateral Position:**

1661.600000000000 mm

**Table Head Tilt Angle:**

0 deg

**Table Cradle Tilt Angle:**

0 deg

**Target Region:**

Abdomen (T-D400, SRT)

**Number of Frames:**

297 1

**SubImages per Frame:**

1 1

**Wedges and Shutters**

**Bottom Shutter:**

174.5 mm

**Left Shutter:**

79.5 mm

**Right Shutter:**

79.5 mm

**Top Shutter:**

174.5 mm

**Beam Position**

**Longitudinal Beam Position:**

1095 mm

**Beam Angle:**

0 deg

**Table Height Position:**

909 mm

## Irradiation Event X-Ray Data

Concept Modifier: Acquisition Plane = Single Plane (113622, DCM)

**DateTime Started:**

2014-03-13 15:38:16

**Irradiation Event Type:**

Fluoroscopy (P5-06000, SRT)

**Reference Point Definition:**

15cm below BeamIsocenter

**Irradiation Event UID:**

1.3.46.670589.28.961600801528.20140313153816505.1

**Dose Area Product:**

3.1918802283E-05 Gy.m2

**Dose (RP):**

0.00136822773186 Gy

**Positioner Primary Angle:**

-0.9 deg

**Positioner Secondary Angle:**

0 deg

### X-Ray Filters

**X-Ray Filter Type:**

Strip filter (113650, DCM)

**X-Ray Filter Material:**

Copper or Copper compound (C-127F9, SRT)

**X-Ray Filter Thickness Minimum:**

0.4 mm

**X-Ray Filter Thickness Maximum:**

0.4 mm

### X-Ray Filters

**X-Ray Filter Type:**

Strip filter (113650, DCM)

**X-Ray Filter Material:**

Aluminum or Aluminum compound (C-120F9, SRT)

**X-Ray Filter Thickness Minimum:**

1 mm

**X-Ray Filter Thickness Maximum:**

1 mm

**Fluoro Mode:**

Pulsed (113631, DCM)

**Pulse Rate:**

15 {pulse}/s

**Number of Pulses:**

167 1

**X-Ray Tube Current:**

59 mA

**Distance Source to Isocenter:**

810 mm

**KVP:**

91.37 kV

**Pulse Width:**

4 ms

**Irradiation Duration:**

11.133 s

**Patient Table Relationship:**

headfirst (F-10470, SRT)

**Patient Orientation:**

recumbent (F-10450, SRT)

Concept Modifier: Patient Orientation Modifier = supine (F-10340, SRT)

**Table Longitudinal Position:**

-22.2 mm

**Table Lateral Position:**

1661.600000000000 mm

**Table Head Tilt Angle:**

0 deg

**Table Cradle Tilt Angle:**

0 deg

**Target Region:**

Abdomen (T-D400, SRT)

**Number of Frames:**

167 1

**SubImages per Frame:**

1 1

**Wedges and Shutters****Bottom Shutter:**

174.5 mm

**Left Shutter:**

79.5 mm

**Right Shutter:**

79.5 mm

**Top Shutter:**

174.5 mm

**Beam Position**

**Longitudinal Beam Position:**

1242 mm

**Beam Angle:**

0 deg

**Table Height Position:**

909 mm

## Irradiation Event X-Ray Data

Concept Modifier: Acquisition Plane = Single Plane (113622, DCM)

**DateTime Started:**

2014-03-13 15:38:29

**Irradiation Event Type:**

Fluoroscopy (P5-06000, SRT)

**Reference Point Definition:**

15cm below BeamIsocenter

**Irradiation Event UID:**

1.3.46.670589.28.961600801528.20140313153828880.1

**Dose Area Product:**

3.3868459575E-05 Gy.m2

**Dose (RP):**

0.00147842056932 Gy

**Positioner Primary Angle:**

-0.9 deg

**Positioner Secondary Angle:**

0 deg

### X-Ray Filters

**X-Ray Filter Type:**

Strip filter (113650, DCM)

**X-Ray Filter Material:**

Copper or Copper compound (C-127F9, SRT)

**X-Ray Filter Thickness Minimum:**

0.4 mm

**X-Ray Filter Thickness Maximum:**

0.4 mm

### X-Ray Filters

**X-Ray Filter Type:**

Strip filter (113650, DCM)

**X-Ray Filter Material:**

Aluminum or Aluminum compound (C-120F9, SRT)

**X-Ray Filter Thickness Minimum:**

1 mm

**X-Ray Filter Thickness Maximum:**

1 mm



**Fluoro Mode:**

Pulsed (113631, DCM)

**Pulse Rate:**

15 {pulse}/s

**Number of Pulses:**

174 1

**X-Ray Tube Current:**

53.8 mA

**Distance Source to Isocenter:**

810 mm

**KVP:**

100.04 kV

**Pulse Width:**

4 ms

**Irradiation Duration:**

11.599 s

**Patient Table Relationship:**

headfirst (F-10470, SRT)

**Patient Orientation:**

recumbent (F-10450, SRT)

Concept Modifier: Patient Orientation Modifier = supine (F-10340, SRT)

**Table Longitudinal Position:**

-22.2 mm

**Table Lateral Position:**

1661.600000000000 mm

**Table Head Tilt Angle:**

0 deg

**Table Cradle Tilt Angle:**

0 deg

**Target Region:**

Abdomen (T-D400, SRT)

**Number of Frames:**

174 1

**SubImages per Frame:**

1 1

**Wedges and Shutters****Bottom Shutter:**

174.5 mm

**Left Shutter:**

79.5 mm

**Right Shutter:**

79.5 mm

**Top Shutter:**

174.5 mm

**Beam Position**

**Longitudinal Beam Position:**

1242 mm

**Beam Angle:**

0 deg

**Table Height Position:**

909 mm

## Irradiation Event X-Ray Data

Concept Modifier: Acquisition Plane = Single Plane (113622, DCM)

**DateTime Started:**

2014-03-13 15:39:26

**Irradiation Event Type:**

Fluoroscopy (P5-06000, SRT)

**Reference Point Definition:**

15cm below BeamIsocenter

**Irradiation Event UID:**

1.3.46.670589.28.961600801528.20140313153925552.1

**Dose Area Product:**

0.00018710124203 Gy.m2

**Dose (RP):**

0.00644857667584 Gy

**Positioner Primary Angle:**

-0.9 deg

**Positioner Secondary Angle:**

0 deg

### X-Ray Filters

**X-Ray Filter Type:**

Strip filter (113650, DCM)

**X-Ray Filter Material:**

Copper or Copper compound (C-127F9, SRT)

**X-Ray Filter Thickness Minimum:**

0.4 mm

**X-Ray Filter Thickness Maximum:**

0.4 mm

### X-Ray Filters

**X-Ray Filter Type:**

Strip filter (113650, DCM)

**X-Ray Filter Material:**

Aluminum or Aluminum compound (C-120F9, SRT)

**X-Ray Filter Thickness Minimum:**

1 mm

**X-Ray Filter Thickness Maximum:**

1 mm

**Fluoro Mode:**

Pulsed (113631, DCM)

**Pulse Rate:**

15 {pulse}/s

**Number of Pulses:**

582 1

**X-Ray Tube Current:**

48.1 mA

**Distance Source to Isocenter:**

810 mm

**KVP:**

105.57 kV

**Pulse Width:**

4 ms

**Irradiation Duration:**

38.8 s

**Patient Table Relationship:**

headfirst (F-10470, SRT)

**Patient Orientation:**

recumbent (F-10450, SRT)

Concept Modifier: Patient Orientation Modifier = supine (F-10340, SRT)

**Table Longitudinal Position:**

-9.2 mm

**Table Lateral Position:**

1661.5 mm

**Table Head Tilt Angle:**

0 deg

**Table Cradle Tilt Angle:**

0 deg

**Target Region:**

Abdomen (T-D400, SRT)

**Number of Frames:**

582 1

**SubImages per Frame:**

1 1

**Wedges and Shutters****Bottom Shutter:**

141.5 mm

**Left Shutter:**

141.5 mm

**Right Shutter:**

141.5 mm

**Top Shutter:**

141.5 mm

**Beam Position**

**Longitudinal Beam Position:**

1102 mm

**Beam Angle:**

0 deg

**Table Height Position:**

909 mm

## Irradiation Event X-Ray Data

Concept Modifier: Acquisition Plane = Single Plane (113622, DCM)

**DateTime Started:**

2014-03-13 15:40:20

**Irradiation Event Type:**

Fluoroscopy (P5-06000, SRT)

**Reference Point Definition:**

15cm below BeamIsocenter

**Irradiation Event UID:**

1.3.46.670589.28.961600801528.20140313154019411.1

**Dose Area Product:**

3.6361641677E-05 Gy.m2

**Dose (RP):**

0.00106519742883 Gy

**Positioner Primary Angle:**

-0.9 deg

**Positioner Secondary Angle:**

0 deg

### X-Ray Filters

**X-Ray Filter Type:**

Strip filter (113650, DCM)

**X-Ray Filter Material:**

Copper or Copper compound (C-127F9, SRT)

**X-Ray Filter Thickness Minimum:**

0.4 mm

**X-Ray Filter Thickness Maximum:**

0.4 mm

### X-Ray Filters

**X-Ray Filter Type:**

Strip filter (113650, DCM)

**X-Ray Filter Material:**

Aluminum or Aluminum compound (C-120F9, SRT)

**X-Ray Filter Thickness Minimum:**

1 mm

**X-Ray Filter Thickness Maximum:**

1 mm

**Fluoro Mode:**

Pulsed (113631, DCM)

**Pulse Rate:**

15 {pulse}/s

**Number of Pulses:**

98 1

**X-Ray Tube Current:**

48.2 mA

**Distance Source to Isocenter:**

810 mm

**KVP:**

105.32 kV

**Pulse Width:**

4 ms

**Irradiation Duration:**

6.533 s

**Patient Table Relationship:**

headfirst (F-10470, SRT)

**Patient Orientation:**

recumbent (F-10450, SRT)

Concept Modifier: Patient Orientation Modifier = supine (F-10340, SRT)

**Table Longitudinal Position:**

-9.2 mm

**Table Lateral Position:**

1661.5 mm

**Table Head Tilt Angle:**

0 deg

**Table Cradle Tilt Angle:**

0 deg

**Target Region:**

Abdomen (T-D400, SRT)

**Number of Frames:**

98 1

**SubImages per Frame:**

1 1

**Wedges and Shutters****Bottom Shutter:**

141.5 mm

**Left Shutter:**

141.5 mm

**Right Shutter:**

141.5 mm

**Top Shutter:**

141.5 mm

**Beam Position**

**Longitudinal Beam Position:**

1118 mm

**Beam Angle:**

0 deg

**Table Height Position:**

909 mm

## Irradiation Event X-Ray Data

Concept Modifier: Acquisition Plane = Single Plane (113622, DCM)

**DateTime Started:**

2014-03-13 15:40:32

**Irradiation Event Type:**

Fluoroscopy (P5-06000, SRT)

**Reference Point Definition:**

15cm below BeamIsocenter

**Irradiation Event UID:**

1.3.46.670589.28.961600801528.20140313154032255.1

**Dose Area Product:**

5.2544422453E-06 Gy.m2

**Dose (RP):**

0.00015610651974 Gy

**Positioner Primary Angle:**

-0.9 deg

**Positioner Secondary Angle:**

0 deg

### X-Ray Filters

**X-Ray Filter Type:**

Strip filter (113650, DCM)

**X-Ray Filter Material:**

Copper or Copper compound (C-127F9, SRT)

**X-Ray Filter Thickness Minimum:**

0.4 mm

**X-Ray Filter Thickness Maximum:**

0.4 mm

### X-Ray Filters

**X-Ray Filter Type:**

Strip filter (113650, DCM)

**X-Ray Filter Material:**

Aluminum or Aluminum compound (C-120F9, SRT)

**X-Ray Filter Thickness Minimum:**

1 mm

**X-Ray Filter Thickness Maximum:**

1 mm

**Fluoro Mode:**

Pulsed (113631, DCM)

**Pulse Rate:**

15 {pulse}/s

**Number of Pulses:**

14 1

**X-Ray Tube Current:**

47.8 mA

**Distance Source to Isocenter:**

810 mm

**KVP:**

106.18 kV

**Pulse Width:**

4 ms

**Irradiation Duration:**

0.933 s

**Patient Table Relationship:**

headfirst (F-10470, SRT)

**Patient Orientation:**

recumbent (F-10450, SRT)

Concept Modifier: Patient Orientation Modifier = supine (F-10340, SRT)

**Table Longitudinal Position:**

43.8 mm

**Table Lateral Position:**

1661.4 mm

**Table Head Tilt Angle:**

0 deg

**Table Cradle Tilt Angle:**

0 deg

**Target Region:**

Abdomen (T-D400, SRT)

**Number of Frames:**

14 1

**SubImages per Frame:**

1 1

**Wedges and Shutters****Bottom Shutter:**

141.5 mm

**Left Shutter:**

141.5 mm

**Right Shutter:**

141.5 mm

**Top Shutter:**

141.5 mm

**Beam Position**

**Longitudinal Beam Position:**

1118 mm

**Beam Angle:**

0 deg

**Table Height Position:**

909 mm

## Irradiation Event X-Ray Data

Concept Modifier: Acquisition Plane = Single Plane (113622, DCM)

**DateTime Started:**

2014-03-13 15:41:21

**Irradiation Event Type:**

Fluoroscopy (P5-06000, SRT)

**Reference Point Definition:**

15cm below BeamIsocenter

**Irradiation Event UID:**

1.3.46.670589.28.961600801528.20140313154121239.1

**Dose Area Product:**

1.7574027799E-05 Gy.m2

**Dose (RP):**

0.00050505050505 Gy

**Positioner Primary Angle:**

-0.9 deg

**Positioner Secondary Angle:**

0 deg

### X-Ray Filters

**X-Ray Filter Type:**

Strip filter (113650, DCM)

**X-Ray Filter Material:**

Copper or Copper compound (C-127F9, SRT)

**X-Ray Filter Thickness Minimum:**

0.4 mm

**X-Ray Filter Thickness Maximum:**

0.4 mm

### X-Ray Filters

**X-Ray Filter Type:**

Strip filter (113650, DCM)

**X-Ray Filter Material:**

Aluminum or Aluminum compound (C-120F9, SRT)

**X-Ray Filter Thickness Minimum:**

1 mm

**X-Ray Filter Thickness Maximum:**

1 mm



**Fluoro Mode:**

Pulsed (113631, DCM)

**Pulse Rate:**

15 {pulse}/s

**Number of Pulses:**

46 1

**X-Ray Tube Current:**

47.4 mA

**Distance Source to Isocenter:**

810 mm

**KVP:**

107.01 kV

**Pulse Width:**

4 ms

**Irradiation Duration:**

3.066 s

**Patient Table Relationship:**

headfirst (F-10470, SRT)

**Patient Orientation:**

recumbent (F-10450, SRT)

Concept Modifier: Patient Orientation Modifier = supine (F-10340, SRT)

**Table Longitudinal Position:**

55.8000000000000 mm

**Table Lateral Position:**

1661.3 mm

**Table Head Tilt Angle:**

0 deg

**Table Cradle Tilt Angle:**

0 deg

**Target Region:**

Abdomen (T-D400, SRT)

**Number of Frames:**

46 1

**SubImages per Frame:**

1 1

**Wedges and Shutters****Bottom Shutter:**

141.5 mm

**Left Shutter:**

141.5 mm

**Right Shutter:**

141.5 mm

**Top Shutter:**

141.5 mm

**Beam Position**

**Longitudinal Beam Position:**

1131 mm

**Beam Angle:**

0 deg

**Table Height Position:**

909 mm

## Irradiation Event X-Ray Data

Concept Modifier: Acquisition Plane = Single Plane (113622, DCM)

**DateTime Started:**

2014-03-13 15:42:11

**Irradiation Event Type:**

Stationary Acquisition (113611, DCM)

**Reference Point Definition:**

15cm below BeamIsocenter

**Acquired Image:**

[XA image](#)

**Irradiation Event UID:**

1.3.46.670589.28.961600801528.20140313154211114.1

**Dose Area Product:**

0.00212307551801 Gy.m2

**Dose (RP):**

0.06410468319559 Gy

**Positioner Primary Angle:**

-0.9 deg

**Positioner Secondary Angle:**

0 deg

### X-Ray Filters

**X-Ray Filter Type:**

Strip filter (113650, DCM)

**X-Ray Filter Material:**

Copper or Copper compound (C-127F9, SRT)

**X-Ray Filter Thickness Minimum:**

0.1 mm

**X-Ray Filter Thickness Maximum:**

0.1 mm

### X-Ray Filters

**X-Ray Filter Type:**

Strip filter (113650, DCM)

**X-Ray Filter Material:**

Aluminum or Aluminum compound (C-120F9, SRT)

**X-Ray Filter Thickness Minimum:**

1 mm

**X-Ray Filter Thickness Maximum:**

1 mm

**X-Ray Tube Current:**

420 mA

**Distance Source to Isocenter:**

810 mm

**KVP:**

80 kV

**Pulse Width:**

73.9 ms

**Distance Source to Detector:**

1060 mm

**Irradiation Duration:**

21.333 s

**Patient Table Relationship:**

headfirst (F-10470, SRT)

**Patient Orientation:**

recumbent (F-10450, SRT)

Concept Modifier: Patient Orientation Modifier = supine (F-10340, SRT)

**Table Longitudinal Position:**

55.8000000000000 mm

**Table Lateral Position:**

1661.3 mm

**Table Head Tilt Angle:**

0 deg

**Table Cradle Tilt Angle:**

0 deg

**Target Region:**

Abdomen (T-D400, SRT)

**Number of Frames:**

37 1

**SubImages per Frame:**

1 1

**Wedges and Shutters****Bottom Shutter:**

141.5 mm

**Left Shutter:**

141.5 mm

**Right Shutter:**

141.5 mm

**Top Shutter:**

141.5 mm

**Beam Position****Longitudinal Beam Position:**

1131 mm

**Beam Angle:**

0 deg

**Table Height Position:**

909 mm

## Irradiation Event X-Ray Data

Concept Modifier: Acquisition Plane = Single Plane (113622, DCM)

**DateTime Started:**

2014-03-13 15:47:40

**Irradiation Event Type:**

Fluoroscopy (P5-06000, SRT)

**Reference Point Definition:**

15cm below BeamIsocenter

**Irradiation Event UID:**

1.3.46.670589.28.961600801528.20140313154740333.1

**Dose Area Product:**

4.6404053799E-06 Gy.m2

**Dose (RP):**

0.00013314967860 Gy

**Positioner Primary Angle:**

-0.9 deg

**Positioner Secondary Angle:**

0 deg

## X-Ray Filters

**X-Ray Filter Type:**

Strip filter (113650, DCM)

**X-Ray Filter Material:**

Copper or Copper compound (C-127F9, SRT)

**X-Ray Filter Thickness Minimum:**

0.4 mm

**X-Ray Filter Thickness Maximum:**

0.4 mm

## X-Ray Filters

**X-Ray Filter Type:**

Strip filter (113650, DCM)

**X-Ray Filter Material:**

Aluminum or Aluminum compound (C-120F9, SRT)

**X-Ray Filter Thickness Minimum:**

1 mm

**X-Ray Filter Thickness Maximum:**

1 mm

**Fluoro Mode:**

Pulsed (113631, DCM)

**Pulse Rate:**

15 {pulse}/s

**Number of Pulses:**

12 1

**X-Ray Tube Current:**

47.2 mA

**Distance Source to Isocenter:**

810 mm

**KVP:**

107.62 kV

**Pulse Width:**

4 ms

**Irradiation Duration:**

0.7989999999999999 s

**Patient Table Relationship:**

headfirst (F-10470, SRT)

**Patient Orientation:**

recumbent (F-10450, SRT)

Concept Modifier: Patient Orientation Modifier = supine (F-10340, SRT)

**Table Longitudinal Position:**

55.80000000000000 mm

**Table Lateral Position:**

1661.3 mm

**Table Head Tilt Angle:**

0 deg

**Table Cradle Tilt Angle:**

0 deg

**Target Region:**

Abdomen (T-D400, SRT)

**Number of Frames:**

12 1

**SubImages per Frame:**

1 1

## Wedges and Shutters

**Bottom Shutter:**

141.5 mm

**Left Shutter:**

141.5 mm

**Right Shutter:**

141.5 mm

**Top Shutter:**

141.5 mm

## Beam Position

**Longitudinal Beam Position:**

1131 mm

**Beam Angle:**

0 deg

**Table Height Position:**

909 mm

## Irradiation Event X-Ray Data

Concept Modifier: Acquisition Plane = Single Plane (113622, DCM)

**DateTime Started:**

2014-03-13 15:47:49

**Irradiation Event Type:**

Fluoroscopy (P5-06000, SRT)

**Reference Point Definition:**

15cm below BeamIsocenter

**Irradiation Event UID:**

1.3.46.670589.28.961600801528.20140313154748614.1

**Dose Area Product:**

5.5945664633E-06 Gy.m2

**Dose (RP):**

0.00036042240587 Gy

**Positioner Primary Angle:**

-0.9 deg

**Positioner Secondary Angle:**

0 deg

### X-Ray Filters

**X-Ray Filter Type:**

Strip filter (113650, DCM)

**X-Ray Filter Material:**

Copper or Copper compound (C-127F9, SRT)

**X-Ray Filter Thickness Minimum:**

0.4 mm

**X-Ray Filter Thickness Maximum:**

0.4 mm

### X-Ray Filters

**X-Ray Filter Type:**

Strip filter (113650, DCM)

**X-Ray Filter Material:**

Aluminum or Aluminum compound (C-120F9, SRT)

**X-Ray Filter Thickness Minimum:**

1 mm

**X-Ray Filter Thickness Maximum:**

1 mm

**Fluoro Mode:**

Pulsed (113631, DCM)

**Pulse Rate:**

15 {pulse}/s

**Number of Pulses:**

26 1

**X-Ray Tube Current:**

43.3 mA

**Distance Source to Isocenter:**

810 mm

**KVP:**

118.37 kV

**Pulse Width:**

4 ms

**Irradiation Duration:**

1.733 s

**Patient Table Relationship:**

headfirst (F-10470, SRT)

**Patient Orientation:**

recumbent (F-10450, SRT)

Concept Modifier: Patient Orientation Modifier = supine (F-10340, SRT)

**Table Longitudinal Position:**

55.8000000000000 mm

**Table Lateral Position:**

1661.3 mm

**Table Head Tilt Angle:**

0 deg

**Table Cradle Tilt Angle:**

0 deg

**Target Region:**

Abdomen (T-D400, SRT)

**Number of Frames:**

26 1

**SubImages per Frame:**

1 1

**Wedges and Shutters****Bottom Shutter:**

84.5 mm

**Left Shutter:**

111 mm

**Right Shutter:**

111 mm

**Top Shutter:**

84.5 mm

**Beam Position**

**Longitudinal Beam Position:**

1131 mm

**Beam Angle:**

0 deg

**Table Height Position:**

909 mm

## Irradiation Event X-Ray Data

Concept Modifier: Acquisition Plane = Single Plane (113622, DCM)

**DateTime Started:**

2014-03-13 15:47:52

**Irradiation Event Type:**

Fluoroscopy (P5-06000, SRT)

**Reference Point Definition:**

15cm below BeamIsocenter

**Irradiation Event UID:**

1.3.46.670589.28.961600801528.20140313154751536.1

**Dose Area Product:**

5.0233932533E-06 Gy.m2

**Dose (RP):**

0.00033057851239 Gy

**Positioner Primary Angle:**

-0.9 deg

**Positioner Secondary Angle:**

0 deg

### X-Ray Filters

**X-Ray Filter Type:**

Strip filter (113650, DCM)

**X-Ray Filter Material:**

Copper or Copper compound (C-127F9, SRT)

**X-Ray Filter Thickness Minimum:**

0.4 mm

**X-Ray Filter Thickness Maximum:**

0.4 mm

### X-Ray Filters

**X-Ray Filter Type:**

Strip filter (113650, DCM)

**X-Ray Filter Material:**

Aluminum or Aluminum compound (C-120F9, SRT)

**X-Ray Filter Thickness Minimum:**

1 mm

**X-Ray Filter Thickness Maximum:**

1 mm



**Fluoro Mode:**

Pulsed (113631, DCM)

**Pulse Rate:**

15 {pulse}/s

**Number of Pulses:**

23 1

**X-Ray Tube Current:**

43.1 mA

**Distance Source to Isocenter:**

810 mm

**KVP:**

120 kV

**Pulse Width:**

4 ms

**Irradiation Duration:**

1.533 s

**Patient Table Relationship:**

headfirst (F-10470, SRT)

**Patient Orientation:**

recumbent (F-10450, SRT)

Concept Modifier: Patient Orientation Modifier = supine (F-10340, SRT)

**Table Longitudinal Position:**

55.8000000000000 mm

**Table Lateral Position:**

1661.3 mm

**Table Head Tilt Angle:**

0 deg

**Table Cradle Tilt Angle:**

0 deg

**Target Region:**

Abdomen (T-D400, SRT)

**Number of Frames:**

23 1

**SubImages per Frame:**

1 1

**Wedges and Shutters****Bottom Shutter:**

84.5 mm

**Left Shutter:**

103.5 mm

**Right Shutter:**

103.5 mm

**Top Shutter:**

84.5 mm

**Beam Position**

**Longitudinal Beam Position:**

1131 mm

**Beam Angle:**

0 deg

**Table Height Position:**

909 mm

## Irradiation Event X-Ray Data

Concept Modifier: Acquisition Plane = Single Plane (113622, DCM)

**DateTime Started:**

2014-03-13 15:47:56

**Irradiation Event Type:**

Fluoroscopy (P5-06000, SRT)

**Reference Point Definition:**

15cm below BeamIsocenter

**Irradiation Event UID:**

1.3.46.670589.28.961600801528.20140313154756161.1

**Dose Area Product:**

1.3744729010E-05 Gy.m2

**Dose (RP):**

0.00087006427915 Gy

**Positioner Primary Angle:**

-0.9 deg

**Positioner Secondary Angle:**

0 deg

### X-Ray Filters

**X-Ray Filter Type:**

Strip filter (113650, DCM)

**X-Ray Filter Material:**

Copper or Copper compound (C-127F9, SRT)

**X-Ray Filter Thickness Minimum:**

0.4 mm

**X-Ray Filter Thickness Maximum:**

0.4 mm

### X-Ray Filters

**X-Ray Filter Type:**

Strip filter (113650, DCM)

**X-Ray Filter Material:**

Aluminum or Aluminum compound (C-120F9, SRT)

**X-Ray Filter Thickness Minimum:**

1 mm

**X-Ray Filter Thickness Maximum:**

1 mm

**Fluoro Mode:**

Pulsed (113631, DCM)

**Pulse Rate:**

15 {pulse}/s

**Number of Pulses:**

63 1

**X-Ray Tube Current:**

43.1 mA

**Distance Source to Isocenter:**

810 mm

**KVP:**

120 kV

**Pulse Width:**

4 ms

**Irradiation Duration:**

4.2 s

**Patient Table Relationship:**

headfirst (F-10470, SRT)

**Patient Orientation:**

recumbent (F-10450, SRT)

Concept Modifier: Patient Orientation Modifier = supine (F-10340, SRT)

**Table Longitudinal Position:**

55.8000000000000 mm

**Table Lateral Position:**

1660.3000000000000 mm

**Table Head Tilt Angle:**

0 deg

**Table Cradle Tilt Angle:**

0 deg

**Target Region:**

Abdomen (T-D400, SRT)

**Number of Frames:**

63 1

**SubImages per Frame:**

1 1

**Wedges and Shutters****Bottom Shutter:**

84.5 mm

**Left Shutter:**

103.5 mm

**Right Shutter:**

103.5 mm

**Top Shutter:**

84.5 mm

**Beam Position**

**Longitudinal Beam Position:**

1131 mm

**Beam Angle:**

0 deg

**Table Height Position:**

909 mm

## Irradiation Event X-Ray Data

Concept Modifier: Acquisition Plane = Single Plane (113622, DCM)

**DateTime Started:**

2014-03-13 15:48:09

**Irradiation Event Type:**

Fluoroscopy (P5-06000, SRT)

**Reference Point Definition:**

15cm below BeamIsocenter

**Irradiation Event UID:**

1.3.46.670589.28.961600801528.20140313154808364.1

**Dose Area Product:**

2.2591109135E-05 Gy.m2

**Dose (RP):**

0.00190312213039 Gy

**Positioner Primary Angle:**

-0.9 deg

**Positioner Secondary Angle:**

0 deg

### X-Ray Filters

**X-Ray Filter Type:**

Strip filter (113650, DCM)

**X-Ray Filter Material:**

Copper or Copper compound (C-127F9, SRT)

**X-Ray Filter Thickness Minimum:**

0.4 mm

**X-Ray Filter Thickness Maximum:**

0.4 mm

### X-Ray Filters

**X-Ray Filter Type:**

Strip filter (113650, DCM)

**X-Ray Filter Material:**

Aluminum or Aluminum compound (C-120F9, SRT)

**X-Ray Filter Thickness Minimum:**

1 mm

**X-Ray Filter Thickness Maximum:**

1 mm

**Fluoro Mode:**

Pulsed (113631, DCM)

**Pulse Rate:**

15 {pulse}/s

**Number of Pulses:**

133 1

**X-Ray Tube Current:**

43.1 mA

**Distance Source to Isocenter:**

810 mm

**KVP:**

120 kV

**Pulse Width:**

4 ms

**Irradiation Duration:**

8.866 s

**Patient Table Relationship:**

headfirst (F-10470, SRT)

**Patient Orientation:**

recumbent (F-10450, SRT)

Concept Modifier: Patient Orientation Modifier = supine (F-10340, SRT)

**Table Longitudinal Position:**

43.8 mm

**Table Lateral Position:**

1660.4 mm

**Table Head Tilt Angle:**

0 deg

**Table Cradle Tilt Angle:**

0 deg

**Target Region:**

Abdomen (T-D400, SRT)

**Number of Frames:**

133 1

**SubImages per Frame:**

1 1

**Wedges and Shutters****Bottom Shutter:**

67.5 mm

**Left Shutter:**

100.5 mm

**Right Shutter:**

100.5 mm

**Top Shutter:**

67.5 mm

**Beam Position**

**Longitudinal Beam Position:**

1131 mm

**Beam Angle:**

0 deg

**Table Height Position:**

909 mm

## Irradiation Event X-Ray Data

Concept Modifier: Acquisition Plane = Single Plane (113622, DCM)

**DateTime Started:**

2014-03-13 15:48:19

**Irradiation Event Type:**

Fluoroscopy (P5-06000, SRT)

**Reference Point Definition:**

15cm below BeamIsocenter

**Irradiation Event UID:**

1.3.46.670589.28.961600801528.20140313154819489.1

**Dose Area Product:**

1.8688692735E-05 Gy.m2

**Dose (RP):**

0.00147153351698 Gy

**Positioner Primary Angle:**

-0.9 deg

**Positioner Secondary Angle:**

0 deg

### X-Ray Filters

**X-Ray Filter Type:**

Strip filter (113650, DCM)

**X-Ray Filter Material:**

Copper or Copper compound (C-127F9, SRT)

**X-Ray Filter Thickness Minimum:**

0.4 mm

**X-Ray Filter Thickness Maximum:**

0.4 mm

### X-Ray Filters

**X-Ray Filter Type:**

Strip filter (113650, DCM)

**X-Ray Filter Material:**

Aluminum or Aluminum compound (C-120F9, SRT)

**X-Ray Filter Thickness Minimum:**

1 mm

**X-Ray Filter Thickness Maximum:**

1 mm

**Fluoro Mode:**

Pulsed (113631, DCM)

**Pulse Rate:**

15 {pulse}/s

**Number of Pulses:**

103 1

**X-Ray Tube Current:**

43.1 mA

**Distance Source to Isocenter:**

810 mm

**KVP:**

120 kV

**Pulse Width:**

4 ms

**Irradiation Duration:**

6.866 s

**Patient Table Relationship:**

headfirst (F-10470, SRT)

**Patient Orientation:**

recumbent (F-10450, SRT)

Concept Modifier: Patient Orientation Modifier = supine (F-10340, SRT)

**Table Longitudinal Position:**

43.8 mm

**Table Lateral Position:**

1660.4 mm

**Table Head Tilt Angle:**

0 deg

**Table Cradle Tilt Angle:**

0 deg

**Target Region:**

Abdomen (T-D400, SRT)

**Number of Frames:**

103 1

**SubImages per Frame:**

1 1

**Wedges and Shutters****Bottom Shutter:**

72.5 mm

**Left Shutter:**

100.5 mm

**Right Shutter:**

100.5 mm

**Top Shutter:**

72.5 mm

**Beam Position**

**Longitudinal Beam Position:**

1131 mm

**Beam Angle:**

0 deg

**Table Height Position:**

909 mm

## Irradiation Event X-Ray Data

Concept Modifier: Acquisition Plane = Single Plane (113622, DCM)

**DateTime Started:**

2014-03-13 15:48:29

**Irradiation Event Type:**

Fluoroscopy (P5-06000, SRT)

**Reference Point Definition:**

15cm below BeamIsocenter

**Irradiation Event UID:**

1.3.46.670589.28.961600801528.20140313154828786.1

**Dose Area Product:**

4.8846187765E-05 Gy.m2

**Dose (RP):**

0.00380394857667 Gy

**Positioner Primary Angle:**

-0.9 deg

**Positioner Secondary Angle:**

0 deg

### X-Ray Filters

**X-Ray Filter Type:**

Strip filter (113650, DCM)

**X-Ray Filter Material:**

Copper or Copper compound (C-127F9, SRT)

**X-Ray Filter Thickness Minimum:**

0.4 mm

**X-Ray Filter Thickness Maximum:**

0.4 mm

### X-Ray Filters

**X-Ray Filter Type:**

Strip filter (113650, DCM)

**X-Ray Filter Material:**

Aluminum or Aluminum compound (C-120F9, SRT)

**X-Ray Filter Thickness Minimum:**

1 mm

**X-Ray Filter Thickness Maximum:**

1 mm



**Fluoro Mode:**

Pulsed (113631, DCM)

**Pulse Rate:**

15 {pulse}/s

**Number of Pulses:**

268 1

**X-Ray Tube Current:**

43.1 mA

**Distance Source to Isocenter:**

810 mm

**KVP:**

120 kV

**Pulse Width:**

4 ms

**Irradiation Duration:**

17.866 s

**Patient Table Relationship:**

headfirst (F-10470, SRT)

**Patient Orientation:**

recumbent (F-10450, SRT)

Concept Modifier: Patient Orientation Modifier = supine (F-10340, SRT)

**Table Longitudinal Position:**

43.8 mm

**Table Lateral Position:**

1660.4 mm

**Table Head Tilt Angle:**

0 deg

**Table Cradle Tilt Angle:**

0 deg

**Target Region:**

Abdomen (T-D400, SRT)

**Number of Frames:**

268 1

**SubImages per Frame:**

1 1

**Wedges and Shutters****Bottom Shutter:**

72.5 mm

**Left Shutter:**

100.5 mm

**Right Shutter:**

100.5 mm

**Top Shutter:**

72.5 mm

**Beam Position**

**Longitudinal Beam Position:**

1131 mm

**Beam Angle:**

0 deg

**Table Height Position:**

909 mm

## Irradiation Event X-Ray Data

Concept Modifier: Acquisition Plane = Single Plane (113622, DCM)

**DateTime Started:**

2014-03-13 15:48:49

**Irradiation Event Type:**

Fluoroscopy (P5-06000, SRT)

**Reference Point Definition:**

15cm below BeamIsocenter

**Irradiation Event UID:**

1.3.46.670589.28.961600801528.20140313154848817.1

**Dose Area Product:**

1.9137498938E-05 Gy.m2

**Dose (RP):**

0.00148760330578 Gy

**Positioner Primary Angle:**

-0.9 deg

**Positioner Secondary Angle:**

0 deg

### X-Ray Filters

**X-Ray Filter Type:**

Strip filter (113650, DCM)

**X-Ray Filter Material:**

Copper or Copper compound (C-127F9, SRT)

**X-Ray Filter Thickness Minimum:**

0.4 mm

**X-Ray Filter Thickness Maximum:**

0.4 mm

### X-Ray Filters

**X-Ray Filter Type:**

Strip filter (113650, DCM)

**X-Ray Filter Material:**

Aluminum or Aluminum compound (C-120F9, SRT)

**X-Ray Filter Thickness Minimum:**

1 mm

**X-Ray Filter Thickness Maximum:**

1 mm

**Fluoro Mode:**

Pulsed (113631, DCM)

**Pulse Rate:**

15 {pulse}/s

**Number of Pulses:**

105 1

**X-Ray Tube Current:**

43.1 mA

**Distance Source to Isocenter:**

810 mm

**KVP:**

120 kV

**Pulse Width:**

4 ms

**Irradiation Duration:**

6.999 s

**Patient Table Relationship:**

headfirst (F-10470, SRT)

**Patient Orientation:**

recumbent (F-10450, SRT)

Concept Modifier: Patient Orientation Modifier = supine (F-10340, SRT)

**Table Longitudinal Position:**

43.8 mm

**Table Lateral Position:**

1660.4 mm

**Table Head Tilt Angle:**

0 deg

**Table Cradle Tilt Angle:**

0 deg

**Target Region:**

Abdomen (T-D400, SRT)

**Number of Frames:**

105 1

**SubImages per Frame:**

1 1

**Wedges and Shutters****Bottom Shutter:**

72.5 mm

**Left Shutter:**

100.5 mm

**Right Shutter:**

100.5 mm

**Top Shutter:**

72.5 mm

**Beam Position**

**Longitudinal Beam Position:**

1131 mm

**Beam Angle:**

0 deg

**Table Height Position:**

909 mm

## Irradiation Event X-Ray Data

Concept Modifier: Acquisition Plane = Single Plane (113622, DCM)

**DateTime Started:**

2014-03-13 15:49:00

**Irradiation Event Type:**

Fluoroscopy (P5-06000, SRT)

**Reference Point Definition:**

15cm below BeamIsocenter

**Irradiation Event UID:**

1.3.46.670589.28.961600801528.20140313154859770.1

**Dose Area Product:**

1.4034165887E-05 Gy.m2

**Dose (RP):**

0.00112029384756 Gy

**Positioner Primary Angle:**

-0.9 deg

**Positioner Secondary Angle:**

0 deg

### X-Ray Filters

**X-Ray Filter Type:**

Strip filter (113650, DCM)

**X-Ray Filter Material:**

Copper or Copper compound (C-127F9, SRT)

**X-Ray Filter Thickness Minimum:**

0.4 mm

**X-Ray Filter Thickness Maximum:**

0.4 mm

### X-Ray Filters

**X-Ray Filter Type:**

Strip filter (113650, DCM)

**X-Ray Filter Material:**

Aluminum or Aluminum compound (C-120F9, SRT)

**X-Ray Filter Thickness Minimum:**

1 mm

**X-Ray Filter Thickness Maximum:**

1 mm

**Fluoro Mode:**

Pulsed (113631, DCM)

**Pulse Rate:**

15 {pulse}/s

**Number of Pulses:**

77 1

**X-Ray Tube Current:**

43.1 mA

**Distance Source to Isocenter:**

810 mm

**KVP:**

120 kV

**Pulse Width:**

4 ms

**Irradiation Duration:**

5.133 s

**Patient Table Relationship:**

headfirst (F-10470, SRT)

**Patient Orientation:**

recumbent (F-10450, SRT)

Concept Modifier: Patient Orientation Modifier = supine (F-10340, SRT)

**Table Longitudinal Position:**

43.8 mm

**Table Lateral Position:**

1660.4 mm

**Table Head Tilt Angle:**

0 deg

**Table Cradle Tilt Angle:**

0 deg

**Target Region:**

Abdomen (T-D400, SRT)

**Number of Frames:**

77 1

**SubImages per Frame:**

1 1

**Wedges and Shutters****Bottom Shutter:**

72.5 mm

**Left Shutter:**

100.5 mm

**Right Shutter:**

100.5 mm

**Top Shutter:**

72.5 mm

**Beam Position**

**Longitudinal Beam Position:**

1131 mm

**Beam Angle:**

0 deg

**Table Height Position:**

909 mm

## Irradiation Event X-Ray Data

Concept Modifier: Acquisition Plane = Single Plane (113622, DCM)

**DateTime Started:**

2014-03-13 15:49:55

**Irradiation Event Type:**

Fluoroscopy (P5-06000, SRT)

**Reference Point Definition:**

15cm below BeamIsocenter

**Irradiation Event UID:**

1.3.46.670589.28.961600801528.20140313154954661.1

**Dose Area Product:**

1.0388927994E-05 Gy.m2

**Dose (RP):**

0.00080119375573 Gy

**Positioner Primary Angle:**

-0.9 deg

**Positioner Secondary Angle:**

0 deg

### X-Ray Filters

**X-Ray Filter Type:**

Strip filter (113650, DCM)

**X-Ray Filter Material:**

Copper or Copper compound (C-127F9, SRT)

**X-Ray Filter Thickness Minimum:**

0.4 mm

**X-Ray Filter Thickness Maximum:**

0.4 mm

### X-Ray Filters

**X-Ray Filter Type:**

Strip filter (113650, DCM)

**X-Ray Filter Material:**

Aluminum or Aluminum compound (C-120F9, SRT)

**X-Ray Filter Thickness Minimum:**

1 mm

**X-Ray Filter Thickness Maximum:**

1 mm

**Fluoro Mode:**

Pulsed (113631, DCM)

**Pulse Rate:**

15 {pulse}/s

**Number of Pulses:**

57 1

**X-Ray Tube Current:**

43.1 mA

**Distance Source to Isocenter:**

810 mm

**KVP:**

120 kV

**Pulse Width:**

4 ms

**Irradiation Duration:**

3.8 s

**Patient Table Relationship:**

headfirst (F-10470, SRT)

**Patient Orientation:**

recumbent (F-10450, SRT)

Concept Modifier: Patient Orientation Modifier = supine (F-10340, SRT)

**Table Longitudinal Position:**

43.8 mm

**Table Lateral Position:**

1660.4 mm

**Table Head Tilt Angle:**

0 deg

**Table Cradle Tilt Angle:**

0 deg

**Target Region:**

Abdomen (T-D400, SRT)

**Number of Frames:**

57 1

**SubImages per Frame:**

1 1

**Wedges and Shutters****Bottom Shutter:**

72.5 mm

**Left Shutter:**

100.5 mm

**Right Shutter:**

100.5 mm

**Top Shutter:**

72.5 mm

**Beam Position**

**Longitudinal Beam Position:**

1131 mm

**Beam Angle:**

0 deg

**Table Height Position:**

909 mm

## Irradiation Event X-Ray Data

Concept Modifier: Acquisition Plane = Single Plane (113622, DCM)

**DateTime Started:**

2014-03-13 15:50:01

**Irradiation Event Type:**

Fluoroscopy (P5-06000, SRT)

**Reference Point Definition:**

15cm below BeamIsocenter

**Irradiation Event UID:**

1.3.46.670589.28.961600801528.20140313155000739.1

**Dose Area Product:**

1.3487380203E-05 Gy.m2

**Dose (RP):**

0.00103994490358 Gy

**Positioner Primary Angle:**

-0.9 deg

**Positioner Secondary Angle:**

0 deg

### X-Ray Filters

**X-Ray Filter Type:**

Strip filter (113650, DCM)

**X-Ray Filter Material:**

Copper or Copper compound (C-127F9, SRT)

**X-Ray Filter Thickness Minimum:**

0.4 mm

**X-Ray Filter Thickness Maximum:**

0.4 mm

### X-Ray Filters

**X-Ray Filter Type:**

Strip filter (113650, DCM)

**X-Ray Filter Material:**

Aluminum or Aluminum compound (C-120F9, SRT)

**X-Ray Filter Thickness Minimum:**

1 mm

**X-Ray Filter Thickness Maximum:**

1 mm



**Fluoro Mode:**

Pulsed (113631, DCM)

**Pulse Rate:**

15 {pulse}/s

**Number of Pulses:**

74 1

**X-Ray Tube Current:**

43.1 mA

**Distance Source to Isocenter:**

810 mm

**KVP:**

120 kV

**Pulse Width:**

4 ms

**Irradiation Duration:**

4.933 s

**Patient Table Relationship:**

headfirst (F-10470, SRT)

**Patient Orientation:**

recumbent (F-10450, SRT)

Concept Modifier: Patient Orientation Modifier = supine (F-10340, SRT)

**Table Longitudinal Position:**

43.8 mm

**Table Lateral Position:**

1660.4 mm

**Table Head Tilt Angle:**

0 deg

**Table Cradle Tilt Angle:**

0 deg

**Target Region:**

Abdomen (T-D400, SRT)

**Number of Frames:**

74 1

**SubImages per Frame:**

1 1

**Wedges and Shutters****Bottom Shutter:**

72.5 mm

**Left Shutter:**

100.5 mm

**Right Shutter:**

100.5 mm

**Top Shutter:**

72.5 mm

**Beam Position**

**Longitudinal Beam Position:**

1131 mm

**Beam Angle:**

0 deg

**Table Height Position:**

909 mm

## Irradiation Event X-Ray Data

Concept Modifier: Acquisition Plane = Single Plane (113622, DCM)

**DateTime Started:**

2014-03-13 15:50:09

**Irradiation Event Type:**

Fluoroscopy (P5-06000, SRT)

**Reference Point Definition:**

15cm below BeamIsocenter

**Irradiation Event UID:**

1.3.46.670589.28.961600801528.20140313155009192.1

**Dose Area Product:**

7.8372614698E-06 Gy.m2

**Dose (RP):**

0.00061294765840 Gy

**Positioner Primary Angle:**

-0.9 deg

**Positioner Secondary Angle:**

0 deg

### X-Ray Filters

**X-Ray Filter Type:**

Strip filter (113650, DCM)

**X-Ray Filter Material:**

Copper or Copper compound (C-127F9, SRT)

**X-Ray Filter Thickness Minimum:**

0.4 mm

**X-Ray Filter Thickness Maximum:**

0.4 mm

### X-Ray Filters

**X-Ray Filter Type:**

Strip filter (113650, DCM)

**X-Ray Filter Material:**

Aluminum or Aluminum compound (C-120F9, SRT)

**X-Ray Filter Thickness Minimum:**

1 mm

**X-Ray Filter Thickness Maximum:**

1 mm

**Fluoro Mode:**

Pulsed (113631, DCM)

**Pulse Rate:**

15 {pulse}/s

**Number of Pulses:**

43 1

**X-Ray Tube Current:**

43.1 mA

**Distance Source to Isocenter:**

810 mm

**KVP:**

120 kV

**Pulse Width:**

4 ms

**Irradiation Duration:**

2.866 s

**Patient Table Relationship:**

headfirst (F-10470, SRT)

**Patient Orientation:**

recumbent (F-10450, SRT)

Concept Modifier: Patient Orientation Modifier = supine (F-10340, SRT)

**Table Longitudinal Position:**

43.8 mm

**Table Lateral Position:**

1660.4 mm

**Table Head Tilt Angle:**

0 deg

**Table Cradle Tilt Angle:**

0 deg

**Target Region:**

Abdomen (T-D400, SRT)

**Number of Frames:**

43 1

**SubImages per Frame:**

1 1

**Wedges and Shutters****Bottom Shutter:**

72.5 mm

**Left Shutter:**

100.5 mm

**Right Shutter:**

100.5 mm

**Top Shutter:**

72.5 mm

**Beam Position**

**Longitudinal Beam Position:**

1131 mm

**Beam Angle:**

0 deg

**Table Height Position:**

909 mm

## Irradiation Event X-Ray Data

Concept Modifier: Acquisition Plane = Single Plane (113622, DCM)

**DateTime Started:**

2014-03-13 15:50:28

**Irradiation Event Type:**

Fluoroscopy (P5-06000, SRT)

**Reference Point Definition:**

15cm below BeamIsocenter

**Irradiation Event UID:**

1.3.46.670589.28.961600801528.20140313155027880.1

**Dose Area Product:**

7.2904757859E-06 Gy.m2

**Dose (RP):**

0.00055325987144 Gy

**Positioner Primary Angle:**

-0.9 deg

**Positioner Secondary Angle:**

0 deg

### X-Ray Filters

**X-Ray Filter Type:**

Strip filter (113650, DCM)

**X-Ray Filter Material:**

Copper or Copper compound (C-127F9, SRT)

**X-Ray Filter Thickness Minimum:**

0.4 mm

**X-Ray Filter Thickness Maximum:**

0.4 mm

### X-Ray Filters

**X-Ray Filter Type:**

Strip filter (113650, DCM)

**X-Ray Filter Material:**

Aluminum or Aluminum compound (C-120F9, SRT)

**X-Ray Filter Thickness Minimum:**

1 mm

**X-Ray Filter Thickness Maximum:**

1 mm

**Fluoro Mode:**

Pulsed (113631, DCM)

**Pulse Rate:**

15 {pulse}/s

**Number of Pulses:**

40 1

**X-Ray Tube Current:**

43.1 mA

**Distance Source to Isocenter:**

810 mm

**KVP:**

120 kV

**Pulse Width:**

4 ms

**Irradiation Duration:**

2.666 s

**Patient Table Relationship:**

headfirst (F-10470, SRT)

**Patient Orientation:**

recumbent (F-10450, SRT)

Concept Modifier: Patient Orientation Modifier = supine (F-10340, SRT)

**Table Longitudinal Position:**

43.8 mm

**Table Lateral Position:**

1660.4 mm

**Table Head Tilt Angle:**

0 deg

**Table Cradle Tilt Angle:**

0 deg

**Target Region:**

Abdomen (T-D400, SRT)

**Number of Frames:**

40 1

**SubImages per Frame:**

1 1

**Wedges and Shutters****Bottom Shutter:**

72.5 mm

**Left Shutter:**

100.5 mm

**Right Shutter:**

100.5 mm

**Top Shutter:**

72.5 mm

**Beam Position**

**Longitudinal Beam Position:**

1131 mm

**Beam Angle:**

0 deg

**Table Height Position:**

909 mm

## Irradiation Event X-Ray Data

Concept Modifier: Acquisition Plane = Single Plane (113622, DCM)

**DateTime Started:**

2014-03-13 15:50:53

**Irradiation Event Type:**

Fluoroscopy (P5-06000, SRT)

**Reference Point Definition:**

15cm below BeamIsocenter

**Irradiation Event UID:**

1.3.46.670589.28.961600801528.20140313155052427.1

**Dose Area Product:**

5.5904893295E-05 Gy.m2

**Dose (RP):**

0.00198576675849 Gy

**Positioner Primary Angle:**

-0.9 deg

**Positioner Secondary Angle:**

0 deg

### X-Ray Filters

**X-Ray Filter Type:**

Strip filter (113650, DCM)

**X-Ray Filter Material:**

Copper or Copper compound (C-127F9, SRT)

**X-Ray Filter Thickness Minimum:**

0.4 mm

**X-Ray Filter Thickness Maximum:**

0.4 mm

### X-Ray Filters

**X-Ray Filter Type:**

Strip filter (113650, DCM)

**X-Ray Filter Material:**

Aluminum or Aluminum compound (C-120F9, SRT)

**X-Ray Filter Thickness Minimum:**

1 mm

**X-Ray Filter Thickness Maximum:**

1 mm

**Fluoro Mode:**

Pulsed (113631, DCM)

**Pulse Rate:**

15 {pulse}/s

**Number of Pulses:**

158 1

**X-Ray Tube Current:**

47.2 mA

**Distance Source to Isocenter:**

810 mm

**KVP:**

107.51 kV

**Pulse Width:**

4 ms

**Irradiation Duration:**

10.533 s

**Patient Table Relationship:**

headfirst (F-10470, SRT)

**Patient Orientation:**

recumbent (F-10450, SRT)

Concept Modifier: Patient Orientation Modifier = supine (F-10340, SRT)

**Table Longitudinal Position:**

43.8 mm

**Table Lateral Position:**

1660.4 mm

**Table Head Tilt Angle:**

0 deg

**Table Cradle Tilt Angle:**

0 deg

**Target Region:**

Abdomen (T-D400, SRT)

**Number of Frames:**

158 1

**SubImages per Frame:**

1 1

**Wedges and Shutters****Bottom Shutter:**

141.5 mm

**Left Shutter:**

141.5 mm

**Right Shutter:**

141.5 mm

**Top Shutter:**

141.5 mm

**Beam Position**

**Longitudinal Beam Position:**

1131 mm

**Beam Angle:**

0 deg

**Table Height Position:**

909 mm

## Irradiation Event X-Ray Data

Concept Modifier: Acquisition Plane = Single Plane (113622, DCM)

**DateTime Started:**

2014-03-13 15:51:13

**Irradiation Event Type:**

Fluoroscopy (P5-06000, SRT)

**Reference Point Definition:**

15cm below BeamIsocenter

**Irradiation Event UID:**

1.3.46.670589.28.961600801528.20140313155113020.1

**Dose Area Product:**

3.4525827918E-06 Gy.m2

**Dose (RP):**

0.00010330578512 Gy

**Positioner Primary Angle:**

-0.9 deg

**Positioner Secondary Angle:**

0 deg

### X-Ray Filters

**X-Ray Filter Type:**

Strip filter (113650, DCM)

**X-Ray Filter Material:**

Copper or Copper compound (C-127F9, SRT)

**X-Ray Filter Thickness Minimum:**

0.4 mm

**X-Ray Filter Thickness Maximum:**

0.4 mm

### X-Ray Filters

**X-Ray Filter Type:**

Strip filter (113650, DCM)

**X-Ray Filter Material:**

Aluminum or Aluminum compound (C-120F9, SRT)

**X-Ray Filter Thickness Minimum:**

1 mm

**X-Ray Filter Thickness Maximum:**

1 mm



**Fluoro Mode:**

Pulsed (113631, DCM)

**Pulse Rate:**

15 {pulse}/s

**Number of Pulses:**

9 1

**X-Ray Tube Current:**

47.2 mA

**Distance Source to Isocenter:**

810 mm

**KVP:**

107.62 kV

**Pulse Width:**

4 ms

**Irradiation Duration:**

0.599 s

**Patient Table Relationship:**

headfirst (F-10470, SRT)

**Patient Orientation:**

recumbent (F-10450, SRT)

Concept Modifier: Patient Orientation Modifier = supine (F-10340, SRT)

**Table Longitudinal Position:**

62.8000000000000 mm

**Table Lateral Position:**

1658.3000000000000 mm

**Table Head Tilt Angle:**

0 deg

**Table Cradle Tilt Angle:**

0 deg

**Target Region:**

Abdomen (T-D400, SRT)

**Number of Frames:**

9 1

**SubImages per Frame:**

1 1

**Wedges and Shutters****Bottom Shutter:**

141.5 mm

**Left Shutter:**

141.5 mm

**Right Shutter:**

141.5 mm

**Top Shutter:**

141.5 mm

**Beam Position**

**Longitudinal Beam Position:**

1131 mm

**Beam Angle:**

0 deg

**Table Height Position:**

909 mm

## Irradiation Event X-Ray Data

Concept Modifier: Acquisition Plane = Single Plane (113622, DCM)

**DateTime Started:**

2014-03-13 15:51:59

**Irradiation Event Type:**

Stationary Acquisition (113611, DCM)

**Reference Point Definition:**

15cm below BeamIsocenter

**Acquired Image:**

[XA image](#)

**Irradiation Event UID:**

1.3.46.670589.28.961600801528.20140313155158504.1

**Dose Area Product:**

0.00184763194748 Gy.m2

**Dose (RP):**

0.05748163452708 Gy

**Positioner Primary Angle:**

-0.9 deg

**Positioner Secondary Angle:**

0 deg

### X-Ray Filters

**X-Ray Filter Type:**

Strip filter (113650, DCM)

**X-Ray Filter Material:**

Copper or Copper compound (C-127F9, SRT)

**X-Ray Filter Thickness Minimum:**

0.1 mm

**X-Ray Filter Thickness Maximum:**

0.1 mm

### X-Ray Filters

**X-Ray Filter Type:**

Strip filter (113650, DCM)

**X-Ray Filter Material:**

Aluminum or Aluminum compound (C-120F9, SRT)

**X-Ray Filter Thickness Minimum:**

1 mm

**X-Ray Filter Thickness Maximum:**

1 mm

**X-Ray Tube Current:**

420 mA

**Distance Source to Isocenter:**

810 mm

**KVP:**

80 kV

**Pulse Width:**

76.6 ms

**Distance Source to Detector:**

1060 mm

**Irradiation Duration:**

13.333 s

**Patient Table Relationship:**

headfirst (F-10470, SRT)

**Patient Orientation:**

recumbent (F-10450, SRT)

Concept Modifier: Patient Orientation Modifier = supine (F-10340, SRT)

**Table Longitudinal Position:**

62.800000000000 mm

**Table Lateral Position:**

1658.300000000000 mm

**Table Head Tilt Angle:**

0 deg

**Table Cradle Tilt Angle:**

0 deg

**Target Region:**

Abdomen (T-D400, SRT)

**Number of Frames:**

32 1

**SubImages per Frame:**

1 1

**Wedges and Shutters****Bottom Shutter:**

141.5 mm

**Left Shutter:**

141.5 mm

**Right Shutter:**

141.5 mm

**Top Shutter:**

141.5 mm

**Beam Position****Longitudinal Beam Position:**

1131 mm

**Beam Angle:**

0 deg

**Table Height Position:**

909 mm

## Irradiation Event X-Ray Data

Concept Modifier: Acquisition Plane = Single Plane (113622, DCM)

**DateTime Started:**

2014-03-13 15:53:18

**Irradiation Event Type:**

Fluoroscopy (P5-06000, SRT)

**Reference Point Definition:**

15cm below BeamIsocenter

**Irradiation Event UID:**

1.3.46.670589.28.961600801528.20140313155317785.1

**Dose Area Product:**

1.5042573285E-05 Gy.m2

**Dose (RP):**

0.00042929292929 Gy

**Positioner Primary Angle:**

-0.9 deg

**Positioner Secondary Angle:**

0 deg

### X-Ray Filters

**X-Ray Filter Type:**

Strip filter (113650, DCM)

**X-Ray Filter Material:**

Copper or Copper compound (C-127F9, SRT)

**X-Ray Filter Thickness Minimum:**

0.4 mm

**X-Ray Filter Thickness Maximum:**

0.4 mm

### X-Ray Filters

**X-Ray Filter Type:**

Strip filter (113650, DCM)

**X-Ray Filter Material:**

Aluminum or Aluminum compound (C-120F9, SRT)

**X-Ray Filter Thickness Minimum:**

1 mm

**X-Ray Filter Thickness Maximum:**

1 mm

**Fluoro Mode:**

Pulsed (113631, DCM)

**Pulse Rate:**

15 {pulse}/s

**Number of Pulses:**

39 1

**X-Ray Tube Current:**

47 mA

**Distance Source to Isocenter:**

810 mm

**KVP:**

107.96 kV

**Pulse Width:**

4 ms

**Irradiation Duration:**

2.6 s

**Patient Table Relationship:**

headfirst (F-10470, SRT)

**Patient Orientation:**

recumbent (F-10450, SRT)

Concept Modifier: Patient Orientation Modifier = supine (F-10340, SRT)

**Table Longitudinal Position:**

62.8000000000000 mm

**Table Lateral Position:**

1658.300000000000 mm

**Table Head Tilt Angle:**

0 deg

**Table Cradle Tilt Angle:**

0 deg

**Target Region:**

Abdomen (T-D400, SRT)

**Number of Frames:**

39 1

**SubImages per Frame:**

1 1

## Wedges and Shutters

**Bottom Shutter:**

141.5 mm

**Left Shutter:**

141.5 mm

**Right Shutter:**

141.5 mm

**Top Shutter:**

141.5 mm

## Beam Position

**Longitudinal Beam Position:**

1131 mm

**Beam Angle:**

0 deg

**Table Height Position:**

909 mm

## Irradiation Event X-Ray Data

Concept Modifier: Acquisition Plane = Single Plane (113622, DCM)

**DateTime Started:**

2014-03-13 15:53:52

**Irradiation Event Type:**

Fluoroscopy (P5-06000, SRT)

**Reference Point Definition:**

15cm below BeamIsocenter

**Irradiation Event UID:**

1.3.46.670589.28.961600801528.20140313155351972.1

**Dose Area Product:**

1.4621909342E-05 Gy.m2

**Dose (RP):**

0.00041092745638 Gy

**Positioner Primary Angle:**

-0.9 deg

**Positioner Secondary Angle:**

0 deg

### X-Ray Filters

**X-Ray Filter Type:**

Strip filter (113650, DCM)

**X-Ray Filter Material:**

Copper or Copper compound (C-127F9, SRT)

**X-Ray Filter Thickness Minimum:**

0.4 mm

**X-Ray Filter Thickness Maximum:**

0.4 mm

### X-Ray Filters

**X-Ray Filter Type:**

Strip filter (113650, DCM)

**X-Ray Filter Material:**

Aluminum or Aluminum compound (C-120F9, SRT)

**X-Ray Filter Thickness Minimum:**

1 mm

**X-Ray Filter Thickness Maximum:**

1 mm

**Fluoro Mode:**

Pulsed (113631, DCM)

**Pulse Rate:**

15 {pulse}/s

**Number of Pulses:**

38 1

**X-Ray Tube Current:**

47.2 mA

**Distance Source to Isocenter:**

810 mm

**KVP:**

107.65 kV

**Pulse Width:**

4 ms

**Irradiation Duration:**

2.533 s

**Patient Table Relationship:**

headfirst (F-10470, SRT)

**Patient Orientation:**

recumbent (F-10450, SRT)

Concept Modifier: Patient Orientation Modifier = supine (F-10340, SRT)

**Table Longitudinal Position:**

62.8000000000000 mm

**Table Lateral Position:**

1658.3000000000000 mm

**Table Head Tilt Angle:**

0 deg

**Table Cradle Tilt Angle:**

0 deg

**Target Region:**

Abdomen (T-D400, SRT)

**Number of Frames:**

38 1

**SubImages per Frame:**

1 1

**Wedges and Shutters****Bottom Shutter:**

141.5 mm

**Left Shutter:**

141.5 mm

**Right Shutter:**

141.5 mm

**Top Shutter:**

141.5 mm

**Beam Position**

**Longitudinal Beam Position:**

1131 mm

**Beam Angle:**

0 deg

**Table Height Position:**

909 mm

## Irradiation Event X-Ray Data

Concept Modifier: Acquisition Plane = Single Plane (113622, DCM)

**DateTime Started:**

2014-03-13 15:53:56

**Irradiation Event Type:**

Fluoroscopy (P5-06000, SRT)

**Reference Point Definition:**

15cm below BeamIsocenter

**Irradiation Event UID:**

1.3.46.670589.28.961600801528.20140313155355754.1

**Dose Area Product:**

2.7441768041E-05 Gy.m2

**Dose (RP):**

0.00104912764003 Gy

**Positioner Primary Angle:**

-0.9 deg

**Positioner Secondary Angle:**

0 deg

### X-Ray Filters

**X-Ray Filter Type:**

Strip filter (113650, DCM)

**X-Ray Filter Material:**

Copper or Copper compound (C-127F9, SRT)

**X-Ray Filter Thickness Minimum:**

0.4 mm

**X-Ray Filter Thickness Maximum:**

0.4 mm

### X-Ray Filters

**X-Ray Filter Type:**

Strip filter (113650, DCM)

**X-Ray Filter Material:**

Aluminum or Aluminum compound (C-120F9, SRT)

**X-Ray Filter Thickness Minimum:**

1 mm

**X-Ray Filter Thickness Maximum:**

1 mm



**Fluoro Mode:**

Pulsed (113631, DCM)

**Pulse Rate:**

15 {pulse}/s

**Number of Pulses:**

86 1

**X-Ray Tube Current:**

44.1 mA

**Distance Source to Isocenter:**

810 mm

**KVP:**

116.11 kV

**Pulse Width:**

4 ms

**Irradiation Duration:**

5.733 s

**Patient Table Relationship:**

headfirst (F-10470, SRT)

**Patient Orientation:**

recumbent (F-10450, SRT)

Concept Modifier: Patient Orientation Modifier = supine (F-10340, SRT)

**Table Longitudinal Position:**

62.8000000000000 mm

**Table Lateral Position:**

1658.300000000000 mm

**Table Head Tilt Angle:**

0 deg

**Table Cradle Tilt Angle:**

0 deg

**Target Region:**

Abdomen (T-D400, SRT)

**Number of Frames:**

86 1

**SubImages per Frame:**

1 1

**Wedges and Shutters****Bottom Shutter:**

97.5 mm

**Left Shutter:**

122.5 mm

**Right Shutter:**

122.5 mm

**Top Shutter:**

97.5 mm

**Beam Position**

**Longitudinal Beam Position:**

1131 mm

**Beam Angle:**

0 deg

**Table Height Position:**

909 mm

## Irradiation Event X-Ray Data

Concept Modifier: Acquisition Plane = Single Plane (113622, DCM)

**DateTime Started:**

2014-03-13 15:54:04

**Irradiation Event Type:**

Fluoroscopy (P5-06000, SRT)

**Reference Point Definition:**

15cm below BeamIsocenter

**Irradiation Event UID:**

1.3.46.670589.28.961600801528.20140313155404129.1

**Dose Area Product:**

9.9933206593E-06 Gy.m2

**Dose (RP):**

0.00047979797979 Gy

**Positioner Primary Angle:**

-0.9 deg

**Positioner Secondary Angle:**

0 deg

### X-Ray Filters

**X-Ray Filter Type:**

Strip filter (113650, DCM)

**X-Ray Filter Material:**

Copper or Copper compound (C-127F9, SRT)

**X-Ray Filter Thickness Minimum:**

0.4 mm

**X-Ray Filter Thickness Maximum:**

0.4 mm

### X-Ray Filters

**X-Ray Filter Type:**

Strip filter (113650, DCM)

**X-Ray Filter Material:**

Aluminum or Aluminum compound (C-120F9, SRT)

**X-Ray Filter Thickness Minimum:**

1 mm

**X-Ray Filter Thickness Maximum:**

1 mm

**Fluoro Mode:**

Pulsed (113631, DCM)

**Pulse Rate:**

15 {pulse}/s

**Number of Pulses:**

35 1

**X-Ray Tube Current:**

43.6 mA

**Distance Source to Isocenter:**

810 mm

**KVP:**

117.48 kV

**Pulse Width:**

4 ms

**Irradiation Duration:**

2.333 s

**Patient Table Relationship:**

headfirst (F-10470, SRT)

**Patient Orientation:**

recumbent (F-10450, SRT)

Concept Modifier: Patient Orientation Modifier = supine (F-10340, SRT)

**Table Longitudinal Position:**

62.8000000000000 mm

**Table Lateral Position:**

1658.3000000000000 mm

**Table Head Tilt Angle:**

0 deg

**Table Cradle Tilt Angle:**

0 deg

**Target Region:**

Abdomen (T-D400, SRT)

**Number of Frames:**

35 1

**SubImages per Frame:**

1 1

**Wedges and Shutters****Bottom Shutter:**

97.5 mm

**Left Shutter:**

122.5 mm

**Right Shutter:**

122.5 mm

**Top Shutter:**

97.5 mm

**Beam Position**

**Longitudinal Beam Position:**

1131 mm

**Beam Angle:**

0 deg

**Table Height Position:**

909 mm

## Irradiation Event X-Ray Data

Concept Modifier: Acquisition Plane = Single Plane (113622, DCM)

**DateTime Started:**

2014-03-13 15:54:07

**Irradiation Event Type:**

Fluoroscopy (P5-06000, SRT)

**Reference Point Definition:**

15cm below BeamIsocenter

**Irradiation Event UID:**

1.3.46.670589.28.961600801528.20140313155407378.1

**Dose Area Product:**

3.5848680376E-05 Gy.m2

**Dose (RP):**

0.00177456382001 Gy

**Positioner Primary Angle:**

-0.9 deg

**Positioner Secondary Angle:**

0 deg

### X-Ray Filters

**X-Ray Filter Type:**

Strip filter (113650, DCM)

**X-Ray Filter Material:**

Copper or Copper compound (C-127F9, SRT)

**X-Ray Filter Thickness Minimum:**

0.4 mm

**X-Ray Filter Thickness Maximum:**

0.4 mm

### X-Ray Filters

**X-Ray Filter Type:**

Strip filter (113650, DCM)

**X-Ray Filter Material:**

Aluminum or Aluminum compound (C-120F9, SRT)

**X-Ray Filter Thickness Minimum:**

1 mm

**X-Ray Filter Thickness Maximum:**

1 mm

**Fluoro Mode:**

Pulsed (113631, DCM)

**Pulse Rate:**

15 {pulse}/s

**Number of Pulses:**

128 1

**X-Ray Tube Current:**

44.1 mA

**Distance Source to Isocenter:**

810 mm

**KVP:**

116.28 kV

**Pulse Width:**

4 ms

**Irradiation Duration:**

8.533 s

**Patient Table Relationship:**

headfirst (F-10470, SRT)

**Patient Orientation:**

recumbent (F-10450, SRT)

Concept Modifier: Patient Orientation Modifier = supine (F-10340, SRT)

**Table Longitudinal Position:**

62.8000000000000 mm

**Table Lateral Position:**

1658.3000000000000 mm

**Table Head Tilt Angle:**

0 deg

**Table Cradle Tilt Angle:**

0 deg

**Target Region:**

Abdomen (T-D400, SRT)

**Number of Frames:**

128 1

**SubImages per Frame:**

1 1

**Wedges and Shutters****Bottom Shutter:**

97.5 mm

**Left Shutter:**

122.5 mm

**Right Shutter:**

122.5 mm

**Top Shutter:**

97.5 mm

**Beam Position**

**Longitudinal Beam Position:**

1131 mm

**Beam Angle:**

0 deg

**Table Height Position:**

909 mm

## Irradiation Event X-Ray Data

Concept Modifier: Acquisition Plane = Single Plane (113622, DCM)

**DateTime Started:**

2014-03-13 15:54:17

**Irradiation Event Type:**

Fluoroscopy (P5-06000, SRT)

**Reference Point Definition:**

15cm below BeamIsocenter

**Irradiation Event UID:**

1.3.46.670589.28.961600801528.20140313155417269.1

**Dose Area Product:**

7.4504644058E-06 Gy.m2

**Dose (RP):**

0.00034894398530 Gy

**Positioner Primary Angle:**

-0.9 deg

**Positioner Secondary Angle:**

0 deg

### X-Ray Filters

**X-Ray Filter Type:**

Strip filter (113650, DCM)

**X-Ray Filter Material:**

Copper or Copper compound (C-127F9, SRT)

**X-Ray Filter Thickness Minimum:**

0.4 mm

**X-Ray Filter Thickness Maximum:**

0.4 mm

### X-Ray Filters

**X-Ray Filter Type:**

Strip filter (113650, DCM)

**X-Ray Filter Material:**

Aluminum or Aluminum compound (C-120F9, SRT)

**X-Ray Filter Thickness Minimum:**

1 mm

**X-Ray Filter Thickness Maximum:**

1 mm

**Fluoro Mode:**

Pulsed (113631, DCM)

**Pulse Rate:**

15 {pulse}/s

**Number of Pulses:**

26 1

**X-Ray Tube Current:**

43.7 mA

**Distance Source to Isocenter:**

810 mm

**KVP:**

117.36 kV

**Pulse Width:**

4 ms

**Irradiation Duration:**

1.733 s

**Patient Table Relationship:**

headfirst (F-10470, SRT)

**Patient Orientation:**

recumbent (F-10450, SRT)

Concept Modifier: Patient Orientation Modifier = supine (F-10340, SRT)

**Table Longitudinal Position:**

62.8000000000000 mm

**Table Lateral Position:**

1658.3000000000000 mm

**Table Head Tilt Angle:**

0 deg

**Table Cradle Tilt Angle:**

0 deg

**Target Region:**

Abdomen (T-D400, SRT)

**Number of Frames:**

26 1

**SubImages per Frame:**

1 1

**Wedges and Shutters****Bottom Shutter:**

97.5 mm

**Left Shutter:**

122.5 mm

**Right Shutter:**

122.5 mm

**Top Shutter:**

97.5 mm

**Beam Position**

**Longitudinal Beam Position:**

1131 mm

**Beam Angle:**

0 deg

**Table Height Position:**

909 mm

## Irradiation Event X-Ray Data

Concept Modifier: Acquisition Plane = Single Plane (113622, DCM)

**DateTime Started:**

2014-03-13 15:54:20

**Irradiation Event Type:**

Fluoroscopy (P5-06000, SRT)

**Reference Point Definition:**

15cm below BeamIsocenter

**Irradiation Event UID:**

1.3.46.670589.28.961600801528.20140313155420457.1

**Dose Area Product:**

8.4456011853E-05 Gy.m2

**Dose (RP):**

0.00472910927456 Gy

**Positioner Primary Angle:**

-0.9 deg

**Positioner Secondary Angle:**

0 deg

### X-Ray Filters

**X-Ray Filter Type:**

Strip filter (113650, DCM)

**X-Ray Filter Material:**

Copper or Copper compound (C-127F9, SRT)

**X-Ray Filter Thickness Minimum:**

0.4 mm

**X-Ray Filter Thickness Maximum:**

0.4 mm

### X-Ray Filters

**X-Ray Filter Type:**

Strip filter (113650, DCM)

**X-Ray Filter Material:**

Aluminum or Aluminum compound (C-120F9, SRT)

**X-Ray Filter Thickness Minimum:**

1 mm

**X-Ray Filter Thickness Maximum:**

1 mm



**Fluoro Mode:**

Pulsed (113631, DCM)

**Pulse Rate:**

15 {pulse}/s

**Number of Pulses:**

340 1

**X-Ray Tube Current:**

43.7 mA

**Distance Source to Isocenter:**

810 mm

**KVP:**

117.13 kV

**Pulse Width:**

4 ms

**Irradiation Duration:**

22.666 s

**Patient Table Relationship:**

headfirst (F-10470, SRT)

**Patient Orientation:**

recumbent (F-10450, SRT)

Concept Modifier: Patient Orientation Modifier = supine (F-10340, SRT)

**Table Longitudinal Position:**

62.8000000000000 mm

**Table Lateral Position:**

1658.3000000000000 mm

**Table Head Tilt Angle:**

0 deg

**Table Cradle Tilt Angle:**

0 deg

**Target Region:**

Abdomen (T-D400, SRT)

**Number of Frames:**

340 1

**SubImages per Frame:**

1 1

**Wedges and Shutters****Bottom Shutter:**

84.5 mm

**Left Shutter:**

122.5 mm

**Right Shutter:**

122.5 mm

**Top Shutter:**

84.5 mm

**Beam Position**

**Longitudinal Beam Position:**

1131 mm

**Beam Angle:**

0 deg

**Table Height Position:**

909 mm

## Irradiation Event X-Ray Data

Concept Modifier: Acquisition Plane = Single Plane (113622, DCM)

**DateTime Started:**

2014-03-13 15:54:45

**Irradiation Event Type:**

Fluoroscopy (P5-06000, SRT)

**Reference Point Definition:**

15cm below BeamIsocenter

**Irradiation Event UID:**

1.3.46.670589.28.961600801528.20140313155445034.1

**Dose Area Product:**

3.7222273920E-05 Gy.m2

**Dose (RP):**

0.00213498622589 Gy

**Positioner Primary Angle:**

-0.9 deg

**Positioner Secondary Angle:**

0 deg

### X-Ray Filters

**X-Ray Filter Type:**

Strip filter (113650, DCM)

**X-Ray Filter Material:**

Copper or Copper compound (C-127F9, SRT)

**X-Ray Filter Thickness Minimum:**

0.4 mm

**X-Ray Filter Thickness Maximum:**

0.4 mm

### X-Ray Filters

**X-Ray Filter Type:**

Strip filter (113650, DCM)

**X-Ray Filter Material:**

Aluminum or Aluminum compound (C-120F9, SRT)

**X-Ray Filter Thickness Minimum:**

1 mm

**X-Ray Filter Thickness Maximum:**

1 mm

**Fluoro Mode:**

Pulsed (113631, DCM)

**Pulse Rate:**

15 {pulse}/s

**Number of Pulses:**

152 1

**X-Ray Tube Current:**

43.6 mA

**Distance Source to Isocenter:**

810 mm

**KVP:**

117.53 kV

**Pulse Width:**

4 ms

**Irradiation Duration:**

10.133 s

**Patient Table Relationship:**

headfirst (F-10470, SRT)

**Patient Orientation:**

recumbent (F-10450, SRT)

Concept Modifier: Patient Orientation Modifier = supine (F-10340, SRT)

**Table Longitudinal Position:**

62.8000000000000 mm

**Table Lateral Position:**

1658.300000000000 mm

**Table Head Tilt Angle:**

0 deg

**Table Cradle Tilt Angle:**

0 deg

**Target Region:**

Abdomen (T-D400, SRT)

**Number of Frames:**

152 1

**SubImages per Frame:**

1 1

**Wedges and Shutters****Bottom Shutter:**

84.5 mm

**Left Shutter:**

122.5 mm

**Right Shutter:**

122.5 mm

**Top Shutter:**

84.5 mm

**Beam Position**

**Longitudinal Beam Position:**

1131 mm

**Beam Angle:**

0 deg

**Table Height Position:**

909 mm

## Irradiation Event X-Ray Data

Concept Modifier: Acquisition Plane = Single Plane (113622, DCM)

**DateTime Started:**

2014-03-13 15:55:23

**Irradiation Event Type:**

Fluoroscopy (P5-06000, SRT)

**Reference Point Definition:**

15cm below BeamIsocenter

**Irradiation Event UID:**

1.3.46.670589.28.961600801528.20140313155523284.1

**Dose Area Product:**

1.6239783389E-05 Gy.m2

**Dose (RP):**

0.00052571166207 Gy

**Positioner Primary Angle:**

-0.9 deg

**Positioner Secondary Angle:**

0 deg

### X-Ray Filters

**X-Ray Filter Type:**

Strip filter (113650, DCM)

**X-Ray Filter Material:**

Copper or Copper compound (C-127F9, SRT)

**X-Ray Filter Thickness Minimum:**

0.4 mm

**X-Ray Filter Thickness Maximum:**

0.4 mm

### X-Ray Filters

**X-Ray Filter Type:**

Strip filter (113650, DCM)

**X-Ray Filter Material:**

Aluminum or Aluminum compound (C-120F9, SRT)

**X-Ray Filter Thickness Minimum:**

1 mm

**X-Ray Filter Thickness Maximum:**

1 mm

**Fluoro Mode:**

Pulsed (113631, DCM)

**Pulse Rate:**

15 {pulse}/s

**Number of Pulses:**

48 1

**X-Ray Tube Current:**

47.2 mA

**Distance Source to Isocenter:**

810 mm

**KVP:**

107.53 kV

**Pulse Width:**

4 ms

**Irradiation Duration:**

3.2 s

**Patient Table Relationship:**

headfirst (F-10470, SRT)

**Patient Orientation:**

recumbent (F-10450, SRT)

Concept Modifier: Patient Orientation Modifier = supine (F-10340, SRT)

**Table Longitudinal Position:**

62.8000000000000 mm

**Table Lateral Position:**

1658.3000000000000 mm

**Table Head Tilt Angle:**

0 deg

**Table Cradle Tilt Angle:**

0 deg

**Target Region:**

Abdomen (T-D400, SRT)

**Number of Frames:**

48 1

**SubImages per Frame:**

1 1

**Wedges and Shutters****Bottom Shutter:**

140 mm

**Left Shutter:**

134.5 mm

**Right Shutter:**

134.5 mm

**Top Shutter:**

140 mm

**Beam Position**

**Longitudinal Beam Position:**

1131 mm

**Beam Angle:**

0 deg

**Table Height Position:**

909 mm

## Irradiation Event X-Ray Data

Concept Modifier: Acquisition Plane = Single Plane (113622, DCM)

**DateTime Started:**

2014-03-13 15:55:29

**Irradiation Event Type:**

Fluoroscopy (P5-06000, SRT)

**Reference Point Definition:**

15cm below BeamIsocenter

**Irradiation Event UID:**

1.3.46.670589.28.961600801528.20140313155529144.1

**Dose Area Product:**

2.4629962369E-05 Gy.m2

**Dose (RP):**

0.00074839302112 Gy

**Positioner Primary Angle:**

-0.9 deg

**Positioner Secondary Angle:**

0 deg

### X-Ray Filters

**X-Ray Filter Type:**

Strip filter (113650, DCM)

**X-Ray Filter Material:**

Copper or Copper compound (C-127F9, SRT)

**X-Ray Filter Thickness Minimum:**

0.4 mm

**X-Ray Filter Thickness Maximum:**

0.4 mm

### X-Ray Filters

**X-Ray Filter Type:**

Strip filter (113650, DCM)

**X-Ray Filter Material:**

Aluminum or Aluminum compound (C-120F9, SRT)

**X-Ray Filter Thickness Minimum:**

1 mm

**X-Ray Filter Thickness Maximum:**

1 mm

**Fluoro Mode:**

Pulsed (113631, DCM)

**Pulse Rate:**

15 {pulse}/s

**Number of Pulses:**

68 1

**X-Ray Tube Current:**

47.1 mA

**Distance Source to Isocenter:**

810 mm

**KVP:**

107.68 kV

**Pulse Width:**

4 ms

**Irradiation Duration:**

4.533 s

**Patient Table Relationship:**

headfirst (F-10470, SRT)

**Patient Orientation:**

recumbent (F-10450, SRT)

Concept Modifier: Patient Orientation Modifier = supine (F-10340, SRT)

**Table Longitudinal Position:**

62.8000000000000 mm

**Table Lateral Position:**

1658.300000000000 mm

**Table Head Tilt Angle:**

0 deg

**Table Cradle Tilt Angle:**

0 deg

**Target Region:**

Abdomen (T-D400, SRT)

**Number of Frames:**

68 1

**SubImages per Frame:**

1 1

**Wedges and Shutters****Bottom Shutter:**

140 mm

**Left Shutter:**

141.5 mm

**Right Shutter:**

141.5 mm

**Top Shutter:**

140 mm

**Beam Position**

**Longitudinal Beam Position:**

1131 mm

**Beam Angle:**

0 deg

**Table Height Position:**

909 mm

## Irradiation Event X-Ray Data

Concept Modifier: Acquisition Plane = Single Plane (113622, DCM)

**DateTime Started:**

2014-03-13 15:56:21

**Irradiation Event Type:**

Stationary Acquisition (113611, DCM)

**Reference Point Definition:**

15cm below BeamIsocenter

**Acquired Image:**

[XA image](#)

**Irradiation Event UID:**

1.3.46.670589.28.961600801528.20140313155620393.1

**Dose Area Product:**

0.00166804224309 Gy.m2

**Dose (RP):**

0.05662304866850 Gy

**Positioner Primary Angle:**

-0.9 deg

**Positioner Secondary Angle:**

0 deg

### X-Ray Filters

**X-Ray Filter Type:**

Strip filter (113650, DCM)

**X-Ray Filter Material:**

Copper or Copper compound (C-127F9, SRT)

**X-Ray Filter Thickness Minimum:**

0.1 mm

**X-Ray Filter Thickness Maximum:**

0.1 mm

### X-Ray Filters

**X-Ray Filter Type:**

Strip filter (113650, DCM)

**X-Ray Filter Material:**

Aluminum or Aluminum compound (C-120F9, SRT)

**X-Ray Filter Thickness Minimum:**

1 mm



**X-Ray Filter Thickness Maximum:**

1 mm

**X-Ray Tube Current:**

420 mA

**Distance Source to Isocenter:**

810 mm

**KVP:**

80 kV

**Pulse Width:**

78 ms

**Distance Source to Detector:**

1060 mm

**Irradiation Duration:**

12.333 s

**Patient Table Relationship:**

headfirst (F-10470, SRT)

**Patient Orientation:**

recumbent (F-10450, SRT)

Concept Modifier: Patient Orientation Modifier = supine (F-10340, SRT)

**Table Longitudinal Position:**

62.800000000000 mm

**Table Lateral Position:**

1658.300000000000 mm

**Table Head Tilt Angle:**

0 deg

**Table Cradle Tilt Angle:**

0 deg

**Target Region:**

Abdomen (T-D400, SRT)

**Number of Frames:**

31 1

**SubImages per Frame:**

1 1

**Wedges and Shutters****Bottom Shutter:**

140 mm

**Left Shutter:**

141.5 mm

**Right Shutter:**

141.5 mm

**Top Shutter:**

140 mm

**Beam Position****Longitudinal Beam Position:**

1131 mm

**Beam Angle:**

0 deg

**Table Height Position:**

909 mm

## Irradiation Event X-Ray Data

Concept Modifier: Acquisition Plane = Single Plane (113622, DCM)

**DateTime Started:**

2014-03-13 15:57:09

**Irradiation Event Type:**

Fluoroscopy (P5-06000, SRT)

**Reference Point Definition:**

15cm below BeamIsocenter

**Irradiation Event UID:**

1.3.46.670589.28.961600801528.20140313155708565.1

**Dose Area Product:**

1.6948111383E-05 Gy.m2

**Dose (RP):**

0.00052800734618 Gy

**Positioner Primary Angle:**

-0.9 deg

**Positioner Secondary Angle:**

0 deg

## X-Ray Filters

**X-Ray Filter Type:**

Strip filter (113650, DCM)

**X-Ray Filter Material:**

Copper or Copper compound (C-127F9, SRT)

**X-Ray Filter Thickness Minimum:**

0.4 mm

**X-Ray Filter Thickness Maximum:**

0.4 mm

## X-Ray Filters

**X-Ray Filter Type:**

Strip filter (113650, DCM)

**X-Ray Filter Material:**

Aluminum or Aluminum compound (C-120F9, SRT)

**X-Ray Filter Thickness Minimum:**

1 mm

**X-Ray Filter Thickness Maximum:**

1 mm

**Fluoro Mode:**

Pulsed (113631, DCM)

**Pulse Rate:**

15 {pulse}/s

**Number of Pulses:**

45 1

**X-Ray Tube Current:**

47.8 mA

**Distance Source to Isocenter:**

810 mm

**KVP:**

109.87 kV

**Pulse Width:**

4 ms

**Irradiation Duration:**

3 s

**Patient Table Relationship:**

headfirst (F-10470, SRT)

**Patient Orientation:**

recumbent (F-10450, SRT)

Concept Modifier: Patient Orientation Modifier = supine (F-10340, SRT)

**Table Longitudinal Position:**

46.8000000000000 mm

**Table Lateral Position:**

1658.300000000000 mm

**Table Head Tilt Angle:**

0 deg

**Table Cradle Tilt Angle:**

0 deg

**Target Region:**

Abdomen (T-D400, SRT)

**Number of Frames:**

45 1

**SubImages per Frame:**

1 1

## Wedges and Shutters

**Bottom Shutter:**

139.5 mm

**Left Shutter:**

139.5 mm

**Right Shutter:**

139.5 mm

**Top Shutter:**

139.5 mm

## Beam Position

**Longitudinal Beam Position:**

1131 mm

**Beam Angle:**

0 deg

**Table Height Position:**

909 mm

## Irradiation Event X-Ray Data

Concept Modifier: Acquisition Plane = Single Plane (113622, DCM)

**DateTime Started:**

2014-03-13 15:58:08

**Irradiation Event Type:**

Stationary Acquisition (113611, DCM)

**Reference Point Definition:**

15cm below BeamIsocenter

**Acquired Image:**

[XA image](#)

**Irradiation Event UID:**

1.3.46.670589.28.961600801528.20140313155807611.1

**Dose Area Product:**

0.00220054238593 Gy.m2

**Dose (RP):**

0.06824150596877 Gy

**Positioner Primary Angle:**

-0.9 deg

**Positioner Secondary Angle:**

0 deg

### X-Ray Filters

**X-Ray Filter Type:**

Strip filter (113650, DCM)

**X-Ray Filter Material:**

Copper or Copper compound (C-127F9, SRT)

**X-Ray Filter Thickness Minimum:**

0.1 mm

**X-Ray Filter Thickness Maximum:**

0.1 mm

### X-Ray Filters

**X-Ray Filter Type:**

Strip filter (113650, DCM)

**X-Ray Filter Material:**

Aluminum or Aluminum compound (C-120F9, SRT)

**X-Ray Filter Thickness Minimum:**

1 mm

**X-Ray Filter Thickness Maximum:**

1 mm

**X-Ray Tube Current:**

420 mA

**Distance Source to Isocenter:**

810 mm

**KVP:**

80 kV

**Pulse Width:**

94.2 ms

**Distance Source to Detector:**

1073 mm

**Irradiation Duration:**

12.333 s

**Patient Table Relationship:**

headfirst (F-10470, SRT)

**Patient Orientation:**

recumbent (F-10450, SRT)

Concept Modifier: Patient Orientation Modifier = supine (F-10340, SRT)

**Table Longitudinal Position:**

7.800000000000000 mm

**Table Lateral Position:**

1655.5 mm

**Table Head Tilt Angle:**

0 deg

**Table Cradle Tilt Angle:**

0 deg

**Target Region:**

Abdomen (T-D400, SRT)

**Number of Frames:**

31 1

**SubImages per Frame:**

1 1

**Wedges and Shutters****Bottom Shutter:**

139.5 mm

**Left Shutter:**

139.5 mm

**Right Shutter:**

139.5 mm

**Top Shutter:**

139.5 mm

**Beam Position****Longitudinal Beam Position:**

1131 mm

**Beam Angle:**

0 deg

**Table Height Position:**

909 mm

## Irradiation Event X-Ray Data

Concept Modifier: Acquisition Plane = Single Plane (113622, DCM)

**DateTime Started:**

2014-03-13 16:01:43

**Irradiation Event Type:**

Fluoroscopy (P5-06000, SRT)

**Reference Point Definition:**

15cm below BeamIsocenter

**Irradiation Event UID:**

1.3.46.670589.28.961600801528.20140313160143282.1

**Dose Area Product:**

6.4359948301E-06 Gy.m2

**Dose (RP):**

0.00023415977961 Gy

**Positioner Primary Angle:**

-0.9 deg

**Positioner Secondary Angle:**

0 deg

## X-Ray Filters

**X-Ray Filter Type:**

Strip filter (113650, DCM)

**X-Ray Filter Material:**

Copper or Copper compound (C-127F9, SRT)

**X-Ray Filter Thickness Minimum:**

0.4 mm

**X-Ray Filter Thickness Maximum:**

0.4 mm

## X-Ray Filters

**X-Ray Filter Type:**

Strip filter (113650, DCM)

**X-Ray Filter Material:**

Aluminum or Aluminum compound (C-120F9, SRT)

**X-Ray Filter Thickness Minimum:**

1 mm

**X-Ray Filter Thickness Maximum:**

1 mm

**Fluoro Mode:**

Pulsed (113631, DCM)

**Pulse Rate:**

15 {pulse}/s

**Number of Pulses:**

13 1

**X-Ray Tube Current:**

60.3 mA

**Distance Source to Isocenter:**

810 mm

**KVP:**

117.19 kV

**Pulse Width:**

4 ms

**Irradiation Duration:**

0.866 s

**Patient Table Relationship:**

headfirst (F-10470, SRT)

**Patient Orientation:**

recumbent (F-10450, SRT)

Concept Modifier: Patient Orientation Modifier = supine (F-10340, SRT)

**Table Longitudinal Position:**

7.800000000000000 mm

**Table Lateral Position:**

1655.5 mm

**Table Head Tilt Angle:**

0 deg

**Table Cradle Tilt Angle:**

0 deg

**Target Region:**

Abdomen (T-D400, SRT)

**Number of Frames:**

13 1

**SubImages per Frame:**

1 1

## Wedges and Shutters

**Bottom Shutter:**

125.5 mm

**Left Shutter:**

125.5 mm

**Right Shutter:**

125.5 mm

**Top Shutter:**

125.5 mm

## Beam Position

**Longitudinal Beam Position:**

1131 mm

**Beam Angle:**

0 deg

**Table Height Position:**

909 mm

## Irradiation Event X-Ray Data

Concept Modifier: Acquisition Plane = Single Plane (113622, DCM)

**DateTime Started:**

2014-03-13 16:01:49

**Irradiation Event Type:**

Fluoroscopy (P5-06000, SRT)

**Reference Point Definition:**

15cm below BeamIsocenter

**Irradiation Event UID:**

1.3.46.670589.28.961600801528.20140313160148626.1

**Dose Area Product:**

1.3258633583E-05 Gy.m2

**Dose (RP):**

0.00038567493112 Gy

**Positioner Primary Angle:**

-0.9 deg

**Positioner Secondary Angle:**

0 deg

### X-Ray Filters

**X-Ray Filter Type:**

Strip filter (113650, DCM)

**X-Ray Filter Material:**

Copper or Copper compound (C-127F9, SRT)

**X-Ray Filter Thickness Minimum:**

0.4 mm

**X-Ray Filter Thickness Maximum:**

0.4 mm

### X-Ray Filters

**X-Ray Filter Type:**

Strip filter (113650, DCM)

**X-Ray Filter Material:**

Aluminum or Aluminum compound (C-120F9, SRT)

**X-Ray Filter Thickness Minimum:**

1 mm

**X-Ray Filter Thickness Maximum:**

1 mm



**Fluoro Mode:**

Pulsed (113631, DCM)

**Pulse Rate:**

15 {pulse}/s

**Number of Pulses:**

25 1

**X-Ray Tube Current:**

65.3 mA

**Distance Source to Isocenter:**

810 mm

**KVP:**

107.24 kV

**Pulse Width:**

4 ms

**Irradiation Duration:**

1.666 s

**Patient Table Relationship:**

headfirst (F-10470, SRT)

**Patient Orientation:**

recumbent (F-10450, SRT)

Concept Modifier: Patient Orientation Modifier = supine (F-10340, SRT)

**Table Longitudinal Position:**

7.800000000000000 mm

**Table Lateral Position:**

1655.5 mm

**Table Head Tilt Angle:**

0 deg

**Table Cradle Tilt Angle:**

0 deg

**Target Region:**

Abdomen (T-D400, SRT)

**Number of Frames:**

25 1

**SubImages per Frame:**

1 1

**Wedges and Shutters****Bottom Shutter:**

125.5 mm

**Left Shutter:**

158.5 mm

**Right Shutter:**

158.5 mm

**Top Shutter:**

125.5 mm

**Beam Position**

**Longitudinal Beam Position:**

1131 mm

**Beam Angle:**

0 deg

**Table Height Position:**

909 mm

## Irradiation Event X-Ray Data

Concept Modifier: Acquisition Plane = Single Plane (113622, DCM)

**DateTime Started:**

2014-03-13 16:02:09

**Irradiation Event Type:**

Fluoroscopy (P5-06000, SRT)

**Reference Point Definition:**

15cm below BeamIsocenter

**Irradiation Event UID:**

1.3.46.670589.28.961600801528.20140313160208579.1

**Dose Area Product:**

0.00010693859102 Gy.m2

**Dose (RP):**

0.00311983471074 Gy

**Positioner Primary Angle:**

92.4 deg

**Positioner Secondary Angle:**

0.1 deg

### X-Ray Filters

**X-Ray Filter Type:**

Strip filter (113650, DCM)

**X-Ray Filter Material:**

Copper or Copper compound (C-127F9, SRT)

**X-Ray Filter Thickness Minimum:**

0.4 mm

**X-Ray Filter Thickness Maximum:**

0.4 mm

### X-Ray Filters

**X-Ray Filter Type:**

Strip filter (113650, DCM)

**X-Ray Filter Material:**

Aluminum or Aluminum compound (C-120F9, SRT)

**X-Ray Filter Thickness Minimum:**

1 mm

**X-Ray Filter Thickness Maximum:**

1 mm

**Fluoro Mode:**

Pulsed (113631, DCM)

**Pulse Rate:**

15 {pulse}/s

**Number of Pulses:**

44 1

**X-Ray Tube Current:**

160 mA

**Distance Source to Isocenter:**

810 mm

**KVP:**

119.18 kV

**Pulse Width:**

5.9 ms

**Irradiation Duration:**

2.933 s

**Patient Table Relationship:**

headfirst (F-10470, SRT)

**Patient Orientation:**

recumbent (F-10450, SRT)

Concept Modifier: Patient Orientation Modifier = supine (F-10340, SRT)

**Table Longitudinal Position:**

18.8 mm

**Table Lateral Position:**

1655.4 mm

**Table Head Tilt Angle:**

0 deg

**Table Cradle Tilt Angle:**

0 deg

**Target Region:**

Abdomen (T-D400, SRT)

**Number of Frames:**

44 1

**SubImages per Frame:**

1 1

**Wedges and Shutters****Bottom Shutter:**

125.5 mm

**Left Shutter:**

158.5 mm

**Right Shutter:**

158.5 mm

**Top Shutter:**

125.5 mm

**Beam Position**

**Longitudinal Beam Position:**

1131 mm

**Beam Angle:**

0 deg

**Table Height Position:**

909 mm

## Irradiation Event X-Ray Data

Concept Modifier: Acquisition Plane = Single Plane (113622, DCM)

**DateTime Started:**

2014-03-13 16:04:01

**Irradiation Event Type:**

Rotational Acquisition (113613, DCM)

**Reference Point Definition:**

15cm below BeamIsocenter

**Acquired Image:**

[XA image](#)

**Irradiation Event UID:**

1.3.46.670589.28.961600801528.20140313160400266.1

**Dose Area Product:**

0.00181658500439 Gy.m2

**Dose (RP):**

0.05249311294765 Gy

**Positioner Primary Angle:**

55.2 deg

**Positioner Secondary Angle:**

0.08 deg

### X-Ray Filters

**X-Ray Filter Type:**

Strip filter (113650, DCM)

**X-Ray Filter Material:**

Copper or Copper compound (C-127F9, SRT)

**X-Ray Filter Thickness Minimum:**

0.4 mm

**X-Ray Filter Thickness Maximum:**

0.4 mm

### X-Ray Filters

**X-Ray Filter Type:**

Strip filter (113650, DCM)

**X-Ray Filter Material:**

Aluminum or Aluminum compound (C-120F9, SRT)

**X-Ray Filter Thickness Minimum:**

1 mm

**X-Ray Filter Thickness Maximum:**

1 mm

**X-Ray Tube Current:**

248.3 mA

**Distance Source to Isocenter:**

810 mm

**KVP:**

121.15 kV

**Pulse Width:**

5.9 ms

**Distance Source to Detector:**

1195 mm

**Irradiation Duration:**

5.199 s

**Patient Table Relationship:**

headfirst (F-10470, SRT)

**Patient Orientation:**

recumbent (F-10450, SRT)

Concept Modifier: Patient Orientation Modifier = supine (F-10340, SRT)

**Table Longitudinal Position:**

18.8 mm

**Table Lateral Position:**

1655.4 mm

**Table Head Tilt Angle:**

0 deg

**Table Cradle Tilt Angle:**

0 deg

**Target Region:**

Abdomen (T-D400, SRT)

**Number of Frames:**

312 1

**SubImages per Frame:**

1 1

**Wedges and Shutters****Bottom Shutter:**

125.5 mm

**Left Shutter:**

158.5 mm

**Right Shutter:**

158.5 mm

**Top Shutter:**

125.5 mm

**Beam Position****Longitudinal Beam Position:**

1131 mm

**Beam Angle:**

0 deg

**Table Height Position:**

885 mm

## Irradiation Event X-Ray Data

Concept Modifier: Acquisition Plane = Single Plane (113622, DCM)

**DateTime Started:**

2014-03-13 16:04:22

**Irradiation Event Type:**

Rotational Acquisition (113613, DCM)

**Reference Point Definition:**

15cm below BeamIsocenter

**Acquired Image:**

[XA image](#)

**Irradiation Event UID:**

1.3.46.670589.28.961600801528.20140313160421876.1

**Dose Area Product:**

0.00181784887615 Gy.m2

**Dose (RP):**

0.05311753902662 Gy

**Positioner Primary Angle:**

55.2 deg

**Positioner Secondary Angle:**

0.08 deg

### X-Ray Filters

**X-Ray Filter Type:**

Strip filter (113650, DCM)

**X-Ray Filter Material:**

Copper or Copper compound (C-127F9, SRT)

**X-Ray Filter Thickness Minimum:**

0.4 mm

**X-Ray Filter Thickness Maximum:**

0.4 mm

### X-Ray Filters

**X-Ray Filter Type:**

Strip filter (113650, DCM)

**X-Ray Filter Material:**

Aluminum or Aluminum compound (C-120F9, SRT)

**X-Ray Filter Thickness Minimum:**

1 mm

**X-Ray Filter Thickness Maximum:**

1 mm

**X-Ray Tube Current:**

241.6 mA

**Distance Source to Isocenter:**

810 mm

**KVP:**

120.99 kV

**Pulse Width:**

5.8 ms

**Distance Source to Detector:**

1195 mm

**Irradiation Duration:**

5.199 s

**Patient Table Relationship:**

headfirst (F-10470, SRT)

**Patient Orientation:**

recumbent (F-10450, SRT)

Concept Modifier: Patient Orientation Modifier = supine (F-10340, SRT)

**Table Longitudinal Position:**

18.8 mm

**Table Lateral Position:**

1655.4 mm

**Table Head Tilt Angle:**

0 deg

**Table Cradle Tilt Angle:**

0 deg

**Target Region:**

Abdomen (T-D400, SRT)

**Number of Frames:**

312 1

**SubImages per Frame:**

1 1

## **Wedges and Shutters**

**Bottom Shutter:**

125.5 mm

**Left Shutter:**

158.5 mm

**Right Shutter:**

158.5 mm

**Top Shutter:**

125.5 mm

## **Beam Position**

**Longitudinal Beam Position:**

1131 mm

**Beam Angle:**

0 deg

**Table Height Position:**

885 mm

## Irradiation Event X-Ray Data

Concept Modifier: Acquisition Plane = Single Plane (113622, DCM)

**DateTime Started:**

2014-03-13 16:11:45

**Irradiation Event Type:**

Fluoroscopy (P5-06000, SRT)

**Reference Point Definition:**

15cm below BeamIsocenter

**Irradiation Event UID:**

1.3.46.670589.28.961600801528.20140313161144391.1

**Dose Area Product:**

6.5801391570E-05 Gy.m2

**Dose (RP):**

0.00173553719008 Gy

**Positioner Primary Angle:**

-0.4 deg

**Positioner Secondary Angle:**

0.1 deg

### X-Ray Filters

**X-Ray Filter Type:**

Strip filter (113650, DCM)

**X-Ray Filter Material:**

Copper or Copper compound (C-127F9, SRT)

**X-Ray Filter Thickness Minimum:**

0.4 mm

**X-Ray Filter Thickness Maximum:**

0.4 mm

### X-Ray Filters

**X-Ray Filter Type:**

Strip filter (113650, DCM)

**X-Ray Filter Material:**

Aluminum or Aluminum compound (C-120F9, SRT)

**X-Ray Filter Thickness Minimum:**

1 mm

**X-Ray Filter Thickness Maximum:**

1 mm

**Fluoro Mode:**

Pulsed (113631, DCM)



**Pulse Rate:**

15 {pulse}/s

**Number of Pulses:**

153 1

**X-Ray Tube Current:**

60.3 mA

**Distance Source to Isocenter:**

810 mm

**KVP:**

100.48 kV

**Pulse Width:**

4 ms

**Irradiation Duration:**

10.199 s

**Patient Table Relationship:**

headfirst (F-10470, SRT)

**Patient Orientation:**

recumbent (F-10450, SRT)

Concept Modifier: Patient Orientation Modifier = supine (F-10340, SRT)

**Table Longitudinal Position:**

-3.10000000000000 mm

**Table Lateral Position:**

1679.5 mm

**Table Head Tilt Angle:**

0 deg

**Table Cradle Tilt Angle:**

0 deg

**Target Region:**

Abdomen (T-D400, SRT)

**Number of Frames:**

153 1

**SubImages per Frame:**

1 1

**Wedges and Shutters****Bottom Shutter:**

132 mm

**Left Shutter:**

167.5 mm

**Right Shutter:**

167.5 mm

**Top Shutter:**

132 mm

**Beam Position****Longitudinal Beam Position:**

1131 mm

**Beam Angle:**

0 deg

**Table Height Position:**

885 mm

## Irradiation Event X-Ray Data

Concept Modifier: Acquisition Plane = Single Plane (113622, DCM)

**DateTime Started:**

2014-03-13 16:12:00

**Irradiation Event Type:**

Fluoroscopy (P5-06000, SRT)

**Reference Point Definition:**

15cm below BeamIsocenter

**Irradiation Event UID:**

1.3.46.670589.28.961600801528.20140313161200547.1

**Dose Area Product:**

3.4579613533E-05 Gy.m2

**Dose (RP):**

0.00086317722681 Gy

**Positioner Primary Angle:**

-0.4 deg

**Positioner Secondary Angle:**

0.1 deg

### X-Ray Filters

**X-Ray Filter Type:**

Strip filter (113650, DCM)

**X-Ray Filter Material:**

Copper or Copper compound (C-127F9, SRT)

**X-Ray Filter Thickness Minimum:**

0.4 mm

**X-Ray Filter Thickness Maximum:**

0.4 mm

### X-Ray Filters

**X-Ray Filter Type:**

Strip filter (113650, DCM)

**X-Ray Filter Material:**

Aluminum or Aluminum compound (C-120F9, SRT)

**X-Ray Filter Thickness Minimum:**

1 mm

**X-Ray Filter Thickness Maximum:**

1 mm

**Fluoro Mode:**

Pulsed (113631, DCM)

**Pulse Rate:**

15 {pulse}/s

**Number of Pulses:**

93 1

**X-Ray Tube Current:**

44.5 mA

**Distance Source to Isocenter:**

810 mm

**KVP:**

108.01 kV

**Pulse Width:**

4 ms

**Irradiation Duration:**

6.199 s

**Patient Table Relationship:**

headfirst (F-10470, SRT)

**Patient Orientation:**

recumbent (F-10450, SRT)

Concept Modifier: Patient Orientation Modifier = supine (F-10340, SRT)

**Table Longitudinal Position:**

-3.100000000000 mm

**Table Lateral Position:**

1679.5 mm

**Table Head Tilt Angle:**

0 deg

**Table Cradle Tilt Angle:**

0 deg

**Target Region:**

Abdomen (T-D400, SRT)

**Number of Frames:**

93 1

**SubImages per Frame:**

1 1

**Wedges and Shutters**

**Bottom Shutter:**

135.5 mm

**Left Shutter:**

144 mm

**Right Shutter:**

144 mm

**Top Shutter:**

135.5 mm

**Beam Position**

**Longitudinal Beam Position:**

1131 mm

**Beam Angle:**

0 deg

**Table Height Position:**

885 mm

## Irradiation Event X-Ray Data

Concept Modifier: Acquisition Plane = Single Plane (113622, DCM)

**DateTime Started:**

2014-03-13 16:12:10

**Irradiation Event Type:**

Fluoroscopy (P5-06000, SRT)

**Reference Point Definition:**

15cm below BeamIsocenter

**Irradiation Event UID:**

1.3.46.670589.28.961600801528.20140313161209954.1

**Dose Area Product:**

0.00011315516631 Gy.m2

**Dose (RP):**

0.00375573921028 Gy

**Positioner Primary Angle:**

-0.4 deg

**Positioner Secondary Angle:**

0.1 deg

### X-Ray Filters

**X-Ray Filter Type:**

Strip filter (113650, DCM)

**X-Ray Filter Material:**

Copper or Copper compound (C-127F9, SRT)

**X-Ray Filter Thickness Minimum:**

0.4 mm

**X-Ray Filter Thickness Maximum:**

0.4 mm

### X-Ray Filters

**X-Ray Filter Type:**

Strip filter (113650, DCM)

**X-Ray Filter Material:**

Aluminum or Aluminum compound (C-120F9, SRT)

**X-Ray Filter Thickness Minimum:**

1 mm

**X-Ray Filter Thickness Maximum:**

1 mm

**Fluoro Mode:**

Pulsed (113631, DCM)

**Pulse Rate:**

15 {pulse}/s

**Number of Pulses:**

336 1

**X-Ray Tube Current:**

43.8 mA

**Distance Source to Isocenter:**

810 mm

**KVP:**

109.71 kV

**Pulse Width:**

4 ms

**Irradiation Duration:**

22.399 s

**Patient Table Relationship:**

headfirst (F-10470, SRT)

**Patient Orientation:**

recumbent (F-10450, SRT)

Concept Modifier: Patient Orientation Modifier = supine (F-10340, SRT)

**Table Longitudinal Position:**

-3.10000000000000 mm

**Table Lateral Position:**

1679.5 mm

**Table Head Tilt Angle:**

0 deg

**Table Cradle Tilt Angle:**

0 deg

**Target Region:**

Abdomen (T-D400, SRT)

**Number of Frames:**

336 1

**SubImages per Frame:**

1 1

**Wedges and Shutters****Bottom Shutter:**

130.5 mm

**Left Shutter:**

134.5 mm

**Right Shutter:**

134.5 mm

**Top Shutter:**

130.5 mm

**Beam Position**

**Longitudinal Beam Position:**

1131 mm

**Beam Angle:**

0 deg

**Table Height Position:**

885 mm

## Irradiation Event X-Ray Data

Concept Modifier: Acquisition Plane = Single Plane (113622, DCM)

**DateTime Started:**

2014-03-13 16:12:36

**Irradiation Event Type:**

Fluoroscopy (P5-06000, SRT)

**Reference Point Definition:**

15cm below BeamIsocenter

**Irradiation Event UID:**

1.3.46.670589.28.961600801528.20140313161235469.1

**Dose Area Product:**

2.3138807123E-05 Gy.m2

**Dose (RP):**

0.00078282828282 Gy

**Positioner Primary Angle:**

-0.4 deg

**Positioner Secondary Angle:**

0.1 deg

### X-Ray Filters

**X-Ray Filter Type:**

Strip filter (113650, DCM)

**X-Ray Filter Material:**

Copper or Copper compound (C-127F9, SRT)

**X-Ray Filter Thickness Minimum:**

0.4 mm

**X-Ray Filter Thickness Maximum:**

0.4 mm

### X-Ray Filters

**X-Ray Filter Type:**

Strip filter (113650, DCM)

**X-Ray Filter Material:**

Aluminum or Aluminum compound (C-120F9, SRT)

**X-Ray Filter Thickness Minimum:**

1 mm

**X-Ray Filter Thickness Maximum:**

1 mm

**Fluoro Mode:**

Pulsed (113631, DCM)

**Pulse Rate:**

15 {pulse}/s

**Number of Pulses:**

69 1

**X-Ray Tube Current:**

43.9 mA

**Distance Source to Isocenter:**

810 mm

**KVP:**

109.6 kV

**Pulse Width:**

4 ms

**Irradiation Duration:**

4.6 s

**Patient Table Relationship:**

headfirst (F-10470, SRT)

**Patient Orientation:**

recumbent (F-10450, SRT)

Concept Modifier: Patient Orientation Modifier = supine (F-10340, SRT)

**Table Longitudinal Position:**

-3.10000000000000 mm

**Table Lateral Position:**

1679.5 mm

**Table Head Tilt Angle:**

0 deg

**Table Cradle Tilt Angle:**

0 deg

**Target Region:**

Abdomen (T-D400, SRT)

**Number of Frames:**

69 1

**SubImages per Frame:**

1 1

**Wedges and Shutters****Bottom Shutter:**

130.5 mm

**Left Shutter:**

134.5 mm

**Right Shutter:**

134.5 mm

**Top Shutter:**

130.5 mm

**Beam Position**

**Longitudinal Beam Position:**

1131 mm

**Beam Angle:**

0 deg

**Table Height Position:**

885 mm

## Irradiation Event X-Ray Data

Concept Modifier: Acquisition Plane = Single Plane (113622, DCM)

**DateTime Started:**

2014-03-13 16:12:55

**Irradiation Event Type:**

Fluoroscopy (P5-06000, SRT)

**Reference Point Definition:**

15cm below BeamIsocenter

**Irradiation Event UID:**

1.3.46.670589.28.961600801528.20140313161255219.1

**Dose Area Product:**

8.5054614507E-05 Gy.m2

**Dose (RP):**

0.002977750229568 Gy

**Positioner Primary Angle:**

-0.4 deg

**Positioner Secondary Angle:**

0.1 deg

### X-Ray Filters

**X-Ray Filter Type:**

Strip filter (113650, DCM)

**X-Ray Filter Material:**

Copper or Copper compound (C-127F9, SRT)

**X-Ray Filter Thickness Minimum:**

0.4 mm

**X-Ray Filter Thickness Maximum:**

0.4 mm

### X-Ray Filters

**X-Ray Filter Type:**

Strip filter (113650, DCM)

**X-Ray Filter Material:**

Aluminum or Aluminum compound (C-120F9, SRT)

**X-Ray Filter Thickness Minimum:**

1 mm

**X-Ray Filter Thickness Maximum:**

1 mm



**Fluoro Mode:**

Pulsed (113631, DCM)

**Pulse Rate:**

15 {pulse}/s

**Number of Pulses:**

260 1

**X-Ray Tube Current:**

42.7 mA

**Distance Source to Isocenter:**

810 mm

**KVP:**

112.7 kV

**Pulse Width:**

4 ms

**Irradiation Duration:**

17.333 s

**Patient Table Relationship:**

headfirst (F-10470, SRT)

**Patient Orientation:**

recumbent (F-10450, SRT)

Concept Modifier: Patient Orientation Modifier = supine (F-10340, SRT)

**Table Longitudinal Position:**

-3.10000000000000 mm

**Table Lateral Position:**

1679.5 mm

**Table Head Tilt Angle:**

0 deg

**Table Cradle Tilt Angle:**

0 deg

**Target Region:**

Abdomen (T-D400, SRT)

**Number of Frames:**

260 1

**SubImages per Frame:**

1 1

**Wedges and Shutters****Bottom Shutter:**

99 mm

**Left Shutter:**

134.5 mm

**Right Shutter:**

134.5 mm

**Top Shutter:**

99 mm

**Beam Position**

**Longitudinal Beam Position:**

1131 mm

**Beam Angle:**

0 deg

**Table Height Position:**

885 mm

## Irradiation Event X-Ray Data

Concept Modifier: Acquisition Plane = Single Plane (113622, DCM)

**DateTime Started:**

2014-03-13 16:13:18

**Irradiation Event Type:**

Fluoroscopy (P5-06000, SRT)

**Reference Point Definition:**

15cm below BeamIsocenter

**Irradiation Event UID:**

1.3.46.670589.28.961600801528.20140313161318187.1

**Dose Area Product:**

9.3778112814E-06 Gy.m2

**Dose (RP):**

0.00040404040404 Gy

**Positioner Primary Angle:**

-0.4 deg

**Positioner Secondary Angle:**

0.1 deg

### X-Ray Filters

**X-Ray Filter Type:**

Strip filter (113650, DCM)

**X-Ray Filter Material:**

Copper or Copper compound (C-127F9, SRT)

**X-Ray Filter Thickness Minimum:**

0.4 mm

**X-Ray Filter Thickness Maximum:**

0.4 mm

### X-Ray Filters

**X-Ray Filter Type:**

Strip filter (113650, DCM)

**X-Ray Filter Material:**

Aluminum or Aluminum compound (C-120F9, SRT)

**X-Ray Filter Thickness Minimum:**

1 mm

**X-Ray Filter Thickness Maximum:**

1 mm

**Fluoro Mode:**

Pulsed (113631, DCM)

**Pulse Rate:**

15 {pulse}/s

**Number of Pulses:**

34 1

**X-Ray Tube Current:**

42.5 mA

**Distance Source to Isocenter:**

810 mm

**KVP:**

113.2 kV

**Pulse Width:**

4 ms

**Irradiation Duration:**

2.266 s

**Patient Table Relationship:**

headfirst (F-10470, SRT)

**Patient Orientation:**

recumbent (F-10450, SRT)

Concept Modifier: Patient Orientation Modifier = supine (F-10340, SRT)

**Table Longitudinal Position:**

17.9 mm

**Table Lateral Position:**

1691.4 mm

**Table Head Tilt Angle:**

0 deg

**Table Cradle Tilt Angle:**

0 deg

**Target Region:**

Abdomen (T-D400, SRT)

**Number of Frames:**

34 1

**SubImages per Frame:**

1 1

**Wedges and Shutters****Bottom Shutter:**

99 mm

**Left Shutter:**

134.5 mm

**Right Shutter:**

134.5 mm

**Top Shutter:**

99 mm

**Beam Position**

**Longitudinal Beam Position:**

1156.000000000000 mm

**Beam Angle:**

0 deg

**Table Height Position:**

885 mm

## Irradiation Event X-Ray Data

Concept Modifier: Acquisition Plane = Single Plane (113622, DCM)

**DateTime Started:**

2014-03-13 16:13:24

**Irradiation Event Type:**

Fluoroscopy (P5-06000, SRT)

**Reference Point Definition:**

15cm below BeamIsocenter

**Irradiation Event UID:**

1.3.46.670589.28.961600801528.20140313161324203.1

**Dose Area Product:**

7.0135814153E-05 Gy.m2

**Dose (RP):**

0.00310606060606 Gy

**Positioner Primary Angle:**

-0.4 deg

**Positioner Secondary Angle:**

0.1 deg

### X-Ray Filters

**X-Ray Filter Type:**

Strip filter (113650, DCM)

**X-Ray Filter Material:**

Copper or Copper compound (C-127F9, SRT)

**X-Ray Filter Thickness Minimum:**

0.4 mm

**X-Ray Filter Thickness Maximum:**

0.4 mm

### X-Ray Filters

**X-Ray Filter Type:**

Strip filter (113650, DCM)

**X-Ray Filter Material:**

Aluminum or Aluminum compound (C-120F9, SRT)

**X-Ray Filter Thickness Minimum:**

1 mm

**X-Ray Filter Thickness Maximum:**

1 mm

**Fluoro Mode:**

Pulsed (113631, DCM)

**Pulse Rate:**

15 {pulse}/s

**Number of Pulses:**

254 1

**X-Ray Tube Current:**

42.4 mA

**Distance Source to Isocenter:**

810 mm

**KVP:**

113.32 kV

**Pulse Width:**

4 ms

**Irradiation Duration:**

16.933 s

**Patient Table Relationship:**

headfirst (F-10470, SRT)

**Patient Orientation:**

recumbent (F-10450, SRT)

Concept Modifier: Patient Orientation Modifier = supine (F-10340, SRT)

**Table Longitudinal Position:**

17.9 mm

**Table Lateral Position:**

1691.4 mm

**Table Head Tilt Angle:**

0 deg

**Table Cradle Tilt Angle:**

0 deg

**Target Region:**

Abdomen (T-D400, SRT)

**Number of Frames:**

254 1

**SubImages per Frame:**

1 1

**Wedges and Shutters****Bottom Shutter:**

99 mm

**Left Shutter:**

134.5 mm

**Right Shutter:**

134.5 mm

**Top Shutter:**

99 mm

**Beam Position**

**Longitudinal Beam Position:**

1156.000000000000 mm

**Beam Angle:**

0 deg

**Table Height Position:**

885 mm

## Irradiation Event X-Ray Data

Concept Modifier: Acquisition Plane = Single Plane (113622, DCM)

**DateTime Started:**

2014-03-13 16:14:20

**Irradiation Event Type:**

Fluoroscopy (P5-06000, SRT)

**Reference Point Definition:**

15cm below BeamIsocenter

**Irradiation Event UID:**

1.3.46.670589.28.961600801528.20140313161420156.1

**Dose Area Product:**

2.2807479753E-05 Gy.m2

**Dose (RP):**

0.00061983471074 Gy

**Positioner Primary Angle:**

-0.4 deg

**Positioner Secondary Angle:**

0.1 deg

### X-Ray Filters

**X-Ray Filter Type:**

Strip filter (113650, DCM)

**X-Ray Filter Material:**

Copper or Copper compound (C-127F9, SRT)

**X-Ray Filter Thickness Minimum:**

0.4 mm

**X-Ray Filter Thickness Maximum:**

0.4 mm

### X-Ray Filters

**X-Ray Filter Type:**

Strip filter (113650, DCM)

**X-Ray Filter Material:**

Aluminum or Aluminum compound (C-120F9, SRT)

**X-Ray Filter Thickness Minimum:**

1 mm

**X-Ray Filter Thickness Maximum:**

1 mm

**Fluoro Mode:**

Pulsed (113631, DCM)

**Pulse Rate:**

15 {pulse}/s

**Number of Pulses:**

57 1

**X-Ray Tube Current:**

43.6 mA

**Distance Source to Isocenter:**

810 mm

**KVP:**

110.35 kV

**Pulse Width:**

4 ms

**Irradiation Duration:**

3.8 s

**Patient Table Relationship:**

headfirst (F-10470, SRT)

**Patient Orientation:**

recumbent (F-10450, SRT)

Concept Modifier: Patient Orientation Modifier = supine (F-10340, SRT)

**Table Longitudinal Position:**

17.9 mm

**Table Lateral Position:**

1691.4 mm

**Table Head Tilt Angle:**

0 deg

**Table Cradle Tilt Angle:**

0 deg

**Target Region:**

Abdomen (T-D400, SRT)

**Number of Frames:**

57 1

**SubImages per Frame:**

1 1

**Wedges and Shutters****Bottom Shutter:**

144 mm

**Left Shutter:**

144 mm

**Right Shutter:**

144 mm

**Top Shutter:**

144 mm

**Beam Position**

**Longitudinal Beam Position:**

1156.000000000000 mm

**Beam Angle:**

0 deg

**Table Height Position:**

885 mm

## Irradiation Event X-Ray Data

Concept Modifier: Acquisition Plane = Single Plane (113622, DCM)

**DateTime Started:**

2014-03-13 16:14:36

**Irradiation Event Type:**

Fluoroscopy (P5-06000, SRT)

**Reference Point Definition:**

15cm below BeamIsocenter

**Irradiation Event UID:**

1.3.46.670589.28.961600801528.20140313161436109.1

**Dose Area Product:**

2.3885043580E-05 Gy.m2

**Dose (RP):**

0.00069100091827 Gy

**Positioner Primary Angle:**

-0.4 deg

**Positioner Secondary Angle:**

0.1 deg

### X-Ray Filters

**X-Ray Filter Type:**

Strip filter (113650, DCM)

**X-Ray Filter Material:**

Copper or Copper compound (C-127F9, SRT)

**X-Ray Filter Thickness Minimum:**

0.4 mm

**X-Ray Filter Thickness Maximum:**

0.4 mm

### X-Ray Filters

**X-Ray Filter Type:**

Strip filter (113650, DCM)

**X-Ray Filter Material:**

Aluminum or Aluminum compound (C-120F9, SRT)

**X-Ray Filter Thickness Minimum:**

1 mm

**X-Ray Filter Thickness Maximum:**

1 mm



**Fluoro Mode:**

Pulsed (113631, DCM)

**Pulse Rate:**

15 {pulse}/s

**Number of Pulses:**

60 1

**X-Ray Tube Current:**

43.6 mA

**Distance Source to Isocenter:**

810 mm

**KVP:**

110.35 kV

**Pulse Width:**

4 ms

**Irradiation Duration:**

4 s

**Patient Table Relationship:**

headfirst (F-10470, SRT)

**Patient Orientation:**

recumbent (F-10450, SRT)

Concept Modifier: Patient Orientation Modifier = supine (F-10340, SRT)

**Table Longitudinal Position:**

27.9000000000000 mm

**Table Lateral Position:**

1681.4 mm

**Table Head Tilt Angle:**

0 deg

**Table Cradle Tilt Angle:**

0 deg

**Target Region:**

Abdomen (T-D400, SRT)

**Number of Frames:**

60 1

**SubImages per Frame:**

1 1

**Wedges and Shutters****Bottom Shutter:**

144 mm

**Left Shutter:**

144 mm

**Right Shutter:**

144 mm

**Top Shutter:**

144 mm

**Beam Position**

**Longitudinal Beam Position:**

1156.000000000000 mm

**Beam Angle:**

0 deg

**Table Height Position:**

885 mm

## Irradiation Event X-Ray Data

Concept Modifier: Acquisition Plane = Single Plane (113622, DCM)

**DateTime Started:**

2014-03-13 16:15:19

**Irradiation Event Type:**

Fluoroscopy (P5-06000, SRT)

**Reference Point Definition:**

15cm below BeamIsocenter

**Irradiation Event UID:**

1.3.46.670589.28.961600801528.20140313161518390.1

**Dose Area Product:**

3.1472924018E-05 Gy.m2

**Dose (RP):**

0.00090449954086 Gy

**Positioner Primary Angle:**

-0.4 deg

**Positioner Secondary Angle:**

0.1 deg

### X-Ray Filters

**X-Ray Filter Type:**

Strip filter (113650, DCM)

**X-Ray Filter Material:**

Copper or Copper compound (C-127F9, SRT)

**X-Ray Filter Thickness Minimum:**

0.4 mm

**X-Ray Filter Thickness Maximum:**

0.4 mm

### X-Ray Filters

**X-Ray Filter Type:**

Strip filter (113650, DCM)

**X-Ray Filter Material:**

Aluminum or Aluminum compound (C-120F9, SRT)

**X-Ray Filter Thickness Minimum:**

1 mm

**X-Ray Filter Thickness Maximum:**

1 mm

**Fluoro Mode:**

Pulsed (113631, DCM)

**Pulse Rate:**

15 {pulse}/s

**Number of Pulses:**

79 1

**X-Ray Tube Current:**

43.6 mA

**Distance Source to Isocenter:**

810 mm

**KVP:**

110.3 kV

**Pulse Width:**

4 ms

**Irradiation Duration:**

5.266 s

**Patient Table Relationship:**

headfirst (F-10470, SRT)

**Patient Orientation:**

recumbent (F-10450, SRT)

Concept Modifier: Patient Orientation Modifier = supine (F-10340, SRT)

**Table Longitudinal Position:**

27.9000000000000 mm

**Table Lateral Position:**

1681.4 mm

**Table Head Tilt Angle:**

0 deg

**Table Cradle Tilt Angle:**

0 deg

**Target Region:**

Abdomen (T-D400, SRT)

**Number of Frames:**

79 1

**SubImages per Frame:**

1 1

**Wedges and Shutters****Bottom Shutter:**

144 mm

**Left Shutter:**

144 mm

**Right Shutter:**

144 mm

**Top Shutter:**

144 mm

**Beam Position**

**Longitudinal Beam Position:**

1156.000000000000 mm

**Beam Angle:**

0 deg

**Table Height Position:**

885 mm

## Irradiation Event X-Ray Data

Concept Modifier: Acquisition Plane = Single Plane (113622, DCM)

**DateTime Started:**

2014-03-13 16:15:26

**Irradiation Event Type:**

Fluoroscopy (P5-06000, SRT)

**Reference Point Definition:**

15cm below BeamIsocenter

**Irradiation Event UID:**

1.3.46.670589.28.961600801528.20140313161526062.1

**Dose Area Product:**

8.0619400796E-07 Gy.m2

**Dose (RP):**

1.8365472910E-05 Gy

**Positioner Primary Angle:**

-0.4 deg

**Positioner Secondary Angle:**

0.1 deg

### X-Ray Filters

**X-Ray Filter Type:**

Strip filter (113650, DCM)

**X-Ray Filter Material:**

Copper or Copper compound (C-127F9, SRT)

**X-Ray Filter Thickness Minimum:**

0.4 mm

**X-Ray Filter Thickness Maximum:**

0.4 mm

### X-Ray Filters

**X-Ray Filter Type:**

Strip filter (113650, DCM)

**X-Ray Filter Material:**

Aluminum or Aluminum compound (C-120F9, SRT)

**X-Ray Filter Thickness Minimum:**

1 mm

**X-Ray Filter Thickness Maximum:**

1 mm

**Fluoro Mode:**

Pulsed (113631, DCM)

**Pulse Rate:**

15 {pulse}/s

**Number of Pulses:**

2 1

**X-Ray Tube Current:**

43 mA

**Distance Source to Isocenter:**

810 mm

**KVP:**

111.76 kV

**Pulse Width:**

4 ms

**Irradiation Duration:**

0.133 s

**Patient Table Relationship:**

headfirst (F-10470, SRT)

**Patient Orientation:**

recumbent (F-10450, SRT)

Concept Modifier: Patient Orientation Modifier = supine (F-10340, SRT)

**Table Longitudinal Position:**

27.9000000000000 mm

**Table Lateral Position:**

1681.4 mm

**Table Head Tilt Angle:**

0 deg

**Table Cradle Tilt Angle:**

0 deg

**Target Region:**

Abdomen (T-D400, SRT)

**Number of Frames:**

2 1

**SubImages per Frame:**

1 1

**Wedges and Shutters****Bottom Shutter:**

144 mm

**Left Shutter:**

144 mm

**Right Shutter:**

144 mm

**Top Shutter:**

144 mm

**Beam Position**

**Longitudinal Beam Position:**

1156.000000000000 mm

**Beam Angle:**

0 deg

**Table Height Position:**

885 mm

## Irradiation Event X-Ray Data

Concept Modifier: Acquisition Plane = Single Plane (113622, DCM)

**DateTime Started:**

2014-03-13 16:15:29

**Irradiation Event Type:**

Fluoroscopy (P5-06000, SRT)

**Reference Point Definition:**

15cm below BeamIsocenter

**Irradiation Event UID:**

1.3.46.670589.28.961600801528.20140313161528687.1

**Dose Area Product:**

3.3741319421E-05 Gy.m2

**Dose (RP):**

0.00090909090909 Gy

**Positioner Primary Angle:**

-0.4 deg

**Positioner Secondary Angle:**

0.1 deg

### X-Ray Filters

**X-Ray Filter Type:**

Strip filter (113650, DCM)

**X-Ray Filter Material:**

Copper or Copper compound (C-127F9, SRT)

**X-Ray Filter Thickness Minimum:**

0.4 mm

**X-Ray Filter Thickness Maximum:**

0.4 mm

### X-Ray Filters

**X-Ray Filter Type:**

Strip filter (113650, DCM)

**X-Ray Filter Material:**

Aluminum or Aluminum compound (C-120F9, SRT)

**X-Ray Filter Thickness Minimum:**

1 mm

**X-Ray Filter Thickness Maximum:**

1 mm

**Fluoro Mode:**

Pulsed (113631, DCM)

**Pulse Rate:**

15 {pulse}/s

**Number of Pulses:**

84 1

**X-Ray Tube Current:**

43.7 mA

**Distance Source to Isocenter:**

810 mm

**KVP:**

110.08 kV

**Pulse Width:**

4 ms

**Irradiation Duration:**

5.6 s

**Patient Table Relationship:**

headfirst (F-10470, SRT)

**Patient Orientation:**

recumbent (F-10450, SRT)

Concept Modifier: Patient Orientation Modifier = supine (F-10340, SRT)

**Table Longitudinal Position:**

27.9000000000000 mm

**Table Lateral Position:**

1681.4 mm

**Table Head Tilt Angle:**

0 deg

**Table Cradle Tilt Angle:**

0 deg

**Target Region:**

Abdomen (T-D400, SRT)

**Number of Frames:**

84 1

**SubImages per Frame:**

1 1

**Wedges and Shutters****Bottom Shutter:**

144 mm

**Left Shutter:**

144 mm

**Right Shutter:**

144 mm

**Top Shutter:**

144 mm

**Beam Position**

**Longitudinal Beam Position:**

1156.000000000000 mm

**Beam Angle:**

0 deg

**Table Height Position:**

885 mm

## Irradiation Event X-Ray Data

Concept Modifier: Acquisition Plane = Single Plane (113622, DCM)

**DateTime Started:**

2014-03-13 16:15:35

**Irradiation Event Type:**

Fluoroscopy (P5-06000, SRT)

**Reference Point Definition:**

15cm below BeamIsocenter

**Irradiation Event UID:**

1.3.46.670589.28.961600801528.20140313161535171.1

**Dose Area Product:**

8.4390330702E-05 Gy.m2

**Dose (RP):**

0.00235307621671 Gy

**Positioner Primary Angle:**

-0.4 deg

**Positioner Secondary Angle:**

0.1 deg

### X-Ray Filters

**X-Ray Filter Type:**

Strip filter (113650, DCM)

**X-Ray Filter Material:**

Copper or Copper compound (C-127F9, SRT)

**X-Ray Filter Thickness Minimum:**

0.4 mm

**X-Ray Filter Thickness Maximum:**

0.4 mm

### X-Ray Filters

**X-Ray Filter Type:**

Strip filter (113650, DCM)

**X-Ray Filter Material:**

Aluminum or Aluminum compound (C-120F9, SRT)

**X-Ray Filter Thickness Minimum:**

1 mm

**X-Ray Filter Thickness Maximum:**

1 mm



**Fluoro Mode:**

Pulsed (113631, DCM)

**Pulse Rate:**

15 {pulse}/s

**Number of Pulses:**

214 1

**X-Ray Tube Current:**

44 mA

**Distance Source to Isocenter:**

810 mm

**KVP:**

109.39 kV

**Pulse Width:**

4 ms

**Irradiation Duration:**

14.266 s

**Patient Table Relationship:**

headfirst (F-10470, SRT)

**Patient Orientation:**

recumbent (F-10450, SRT)

Concept Modifier: Patient Orientation Modifier = supine (F-10340, SRT)

**Table Longitudinal Position:**

27.9000000000000 mm

**Table Lateral Position:**

1681.4 mm

**Table Head Tilt Angle:**

0 deg

**Table Cradle Tilt Angle:**

0 deg

**Target Region:**

Abdomen (T-D400, SRT)

**Number of Frames:**

214 1

**SubImages per Frame:**

1 1

**Wedges and Shutters****Bottom Shutter:**

144 mm

**Left Shutter:**

144 mm

**Right Shutter:**

144 mm

**Top Shutter:**

144 mm

**Beam Position**

**Longitudinal Beam Position:**

1156.000000000000 mm

**Beam Angle:**

0 deg

**Table Height Position:**

885 mm

## Irradiation Event X-Ray Data

Concept Modifier: Acquisition Plane = Single Plane (113622, DCM)

**DateTime Started:**

2014-03-13 16:15:52

**Irradiation Event Type:**

Fluoroscopy (P5-06000, SRT)

**Reference Point Definition:**

15cm below BeamIsocenter

**Irradiation Event UID:**

1.3.46.670589.28.961600801528.20140313161551968.1

**Dose Area Product:**

0.00015956277286 Gy.m2

**Dose (RP):**

0.00455004591368 Gy

**Positioner Primary Angle:**

-0.4 deg

**Positioner Secondary Angle:**

0.1 deg

### X-Ray Filters

**X-Ray Filter Type:**

Strip filter (113650, DCM)

**X-Ray Filter Material:**

Copper or Copper compound (C-127F9, SRT)

**X-Ray Filter Thickness Minimum:**

0.4 mm

**X-Ray Filter Thickness Maximum:**

0.4 mm

### X-Ray Filters

**X-Ray Filter Type:**

Strip filter (113650, DCM)

**X-Ray Filter Material:**

Aluminum or Aluminum compound (C-120F9, SRT)

**X-Ray Filter Thickness Minimum:**

1 mm

**X-Ray Filter Thickness Maximum:**

1 mm

**Fluoro Mode:**

Pulsed (113631, DCM)

**Pulse Rate:**

15 {pulse}/s

**Number of Pulses:**

405 1

**X-Ray Tube Current:**

43.9 mA

**Distance Source to Isocenter:**

810 mm

**KVP:**

109.66 kV

**Pulse Width:**

4 ms

**Irradiation Duration:**

26.999 s

**Patient Table Relationship:**

headfirst (F-10470, SRT)

**Patient Orientation:**

recumbent (F-10450, SRT)

Concept Modifier: Patient Orientation Modifier = supine (F-10340, SRT)

**Table Longitudinal Position:**

27.9000000000000 mm

**Table Lateral Position:**

1681.4 mm

**Table Head Tilt Angle:**

0 deg

**Table Cradle Tilt Angle:**

0 deg

**Target Region:**

Abdomen (T-D400, SRT)

**Number of Frames:**

405 1

**SubImages per Frame:**

1 1

**Wedges and Shutters****Bottom Shutter:**

144 mm

**Left Shutter:**

144 mm

**Right Shutter:**

144 mm

**Top Shutter:**

144 mm

**Beam Position**

**Longitudinal Beam Position:**

1156.000000000000 mm

**Beam Angle:**

0 deg

**Table Height Position:**

885 mm

## Irradiation Event X-Ray Data

Concept Modifier: Acquisition Plane = Single Plane (113622, DCM)

**DateTime Started:**

2014-03-13 16:16:23

**Irradiation Event Type:**

Fluoroscopy (P5-06000, SRT)

**Reference Point Definition:**

15cm below BeamIsocenter

**Irradiation Event UID:**

1.3.46.670589.28.961600801528.20140313161622655.1

**Dose Area Product:**

2.6351602615E-05 Gy.m2

**Dose (RP):**

0.00073461891643 Gy

**Positioner Primary Angle:**

-0.4 deg

**Positioner Secondary Angle:**

0.1 deg

### X-Ray Filters

**X-Ray Filter Type:**

Strip filter (113650, DCM)

**X-Ray Filter Material:**

Copper or Copper compound (C-127F9, SRT)

**X-Ray Filter Thickness Minimum:**

0.4 mm

**X-Ray Filter Thickness Maximum:**

0.4 mm

### X-Ray Filters

**X-Ray Filter Type:**

Strip filter (113650, DCM)

**X-Ray Filter Material:**

Aluminum or Aluminum compound (C-120F9, SRT)

**X-Ray Filter Thickness Minimum:**

1 mm

**X-Ray Filter Thickness Maximum:**

1 mm

**Fluoro Mode:**

Pulsed (113631, DCM)

**Pulse Rate:**

15 {pulse}/s

**Number of Pulses:**

67 1

**X-Ray Tube Current:**

43.9 mA

**Distance Source to Isocenter:**

810 mm

**KVP:**

109.66 kV

**Pulse Width:**

4 ms

**Irradiation Duration:**

4.466 s

**Patient Table Relationship:**

headfirst (F-10470, SRT)

**Patient Orientation:**

recumbent (F-10450, SRT)

Concept Modifier: Patient Orientation Modifier = supine (F-10340, SRT)

**Table Longitudinal Position:**

27.9000000000000 mm

**Table Lateral Position:**

1681.4 mm

**Table Head Tilt Angle:**

0 deg

**Table Cradle Tilt Angle:**

0 deg

**Target Region:**

Abdomen (T-D400, SRT)

**Number of Frames:**

67 1

**SubImages per Frame:**

1 1

**Wedges and Shutters****Bottom Shutter:**

144 mm

**Left Shutter:**

144 mm

**Right Shutter:**

144 mm

**Top Shutter:**

144 mm

**Beam Position**

**Longitudinal Beam Position:**

1156.000000000000 mm

**Beam Angle:**

0 deg

**Table Height Position:**

885 mm

## Irradiation Event X-Ray Data

Concept Modifier: Acquisition Plane = Single Plane (113622, DCM)

**DateTime Started:**

2014-03-13 16:16:29

**Irradiation Event Type:**

Fluoroscopy (P5-06000, SRT)

**Reference Point Definition:**

15cm below BeamIsocenter

**Irradiation Event UID:**

1.3.46.670589.28.961600801528.20140313161628686.1

**Dose Area Product:**

7.0520842986E-05 Gy.m2

**Dose (RP):**

0.00203397612488 Gy

**Positioner Primary Angle:**

-0.4 deg

**Positioner Secondary Angle:**

0.1 deg

### X-Ray Filters

**X-Ray Filter Type:**

Strip filter (113650, DCM)

**X-Ray Filter Material:**

Copper or Copper compound (C-127F9, SRT)

**X-Ray Filter Thickness Minimum:**

0.4 mm

**X-Ray Filter Thickness Maximum:**

0.4 mm

### X-Ray Filters

**X-Ray Filter Type:**

Strip filter (113650, DCM)

**X-Ray Filter Material:**

Aluminum or Aluminum compound (C-120F9, SRT)

**X-Ray Filter Thickness Minimum:**

1 mm

**X-Ray Filter Thickness Maximum:**

1 mm

**Fluoro Mode:**

Pulsed (113631, DCM)

**Pulse Rate:**

15 {pulse}/s

**Number of Pulses:**

178 1

**X-Ray Tube Current:**

43.8 mA

**Distance Source to Isocenter:**

810 mm

**KVP:**

109.76 kV

**Pulse Width:**

4 ms

**Irradiation Duration:**

11.866 s

**Patient Table Relationship:**

headfirst (F-10470, SRT)

**Patient Orientation:**

recumbent (F-10450, SRT)

Concept Modifier: Patient Orientation Modifier = supine (F-10340, SRT)

**Table Longitudinal Position:**

27.9000000000000 mm

**Table Lateral Position:**

1681.4 mm

**Table Head Tilt Angle:**

0 deg

**Table Cradle Tilt Angle:**

0 deg

**Target Region:**

Abdomen (T-D400, SRT)

**Number of Frames:**

178 1

**SubImages per Frame:**

1 1

**Wedges and Shutters****Bottom Shutter:**

144 mm

**Left Shutter:**

144 mm

**Right Shutter:**

144 mm

**Top Shutter:**

144 mm

**Beam Position**

**Longitudinal Beam Position:**

1156.000000000000 mm

**Beam Angle:**

0 deg

**Table Height Position:**

885 mm

## Irradiation Event X-Ray Data

Concept Modifier: Acquisition Plane = Single Plane (113622, DCM)

**DateTime Started:**

2014-03-13 16:16:44

**Irradiation Event Type:**

Fluoroscopy (P5-06000, SRT)

**Reference Point Definition:**

15cm below BeamIsocenter

**Irradiation Event UID:**

1.3.46.670589.28.961600801528.20140313161644217.1

**Dose Area Product:**

1.1726239150E-05 Gy.m2

**Dose (RP):**

0.00032828282828 Gy

**Positioner Primary Angle:**

-0.4 deg

**Positioner Secondary Angle:**

0.1 deg

### X-Ray Filters

**X-Ray Filter Type:**

Strip filter (113650, DCM)

**X-Ray Filter Material:**

Copper or Copper compound (C-127F9, SRT)

**X-Ray Filter Thickness Minimum:**

0.4 mm

**X-Ray Filter Thickness Maximum:**

0.4 mm

### X-Ray Filters

**X-Ray Filter Type:**

Strip filter (113650, DCM)

**X-Ray Filter Material:**

Aluminum or Aluminum compound (C-120F9, SRT)

**X-Ray Filter Thickness Minimum:**

1 mm

**X-Ray Filter Thickness Maximum:**

1 mm



**Fluoro Mode:**

Pulsed (113631, DCM)

**Pulse Rate:**

15 {pulse}/s

**Number of Pulses:**

30 1

**X-Ray Tube Current:**

44 mA

**Distance Source to Isocenter:**

810 mm

**KVP:**

109.33 kV

**Pulse Width:**

4 ms

**Irradiation Duration:**

1.999 s

**Patient Table Relationship:**

headfirst (F-10470, SRT)

**Patient Orientation:**

recumbent (F-10450, SRT)

Concept Modifier: Patient Orientation Modifier = supine (F-10340, SRT)

**Table Longitudinal Position:**

27.9000000000000 mm

**Table Lateral Position:**

1681.4 mm

**Table Head Tilt Angle:**

0 deg

**Table Cradle Tilt Angle:**

0 deg

**Target Region:**

Abdomen (T-D400, SRT)

**Number of Frames:**

30 1

**SubImages per Frame:**

1 1

**Wedges and Shutters****Bottom Shutter:**

144 mm

**Left Shutter:**

144 mm

**Right Shutter:**

144 mm

**Top Shutter:**

144 mm

**Beam Position**

**Longitudinal Beam Position:**

1156.000000000000 mm

**Beam Angle:**

0 deg

**Table Height Position:**

885 mm

## Irradiation Event X-Ray Data

Concept Modifier: Acquisition Plane = Single Plane (113622, DCM)

**DateTime Started:**

2014-03-13 16:16:48

**Irradiation Event Type:**

Fluoroscopy (P5-06000, SRT)

**Reference Point Definition:**

15cm below BeamIsocenter

**Irradiation Event UID:**

1.3.46.670589.28.961600801528.20140313161647827.1

**Dose Area Product:**

4.7985920945E-05 Gy.m2

**Dose (RP):**

0.00132231404958 Gy

**Positioner Primary Angle:**

-0.4 deg

**Positioner Secondary Angle:**

0.1 deg

### X-Ray Filters

**X-Ray Filter Type:**

Strip filter (113650, DCM)

**X-Ray Filter Material:**

Copper or Copper compound (C-127F9, SRT)

**X-Ray Filter Thickness Minimum:**

0.4 mm

**X-Ray Filter Thickness Maximum:**

0.4 mm

### X-Ray Filters

**X-Ray Filter Type:**

Strip filter (113650, DCM)

**X-Ray Filter Material:**

Aluminum or Aluminum compound (C-120F9, SRT)

**X-Ray Filter Thickness Minimum:**

1 mm

**X-Ray Filter Thickness Maximum:**

1 mm

**Fluoro Mode:**

Pulsed (113631, DCM)

**Pulse Rate:**

15 {pulse}/s

**Number of Pulses:**

121 1

**X-Ray Tube Current:**

43.9 mA

**Distance Source to Isocenter:**

810 mm

**KVP:**

109.6 kV

**Pulse Width:**

4 ms

**Irradiation Duration:**

8.066 s

**Patient Table Relationship:**

headfirst (F-10470, SRT)

**Patient Orientation:**

recumbent (F-10450, SRT)

Concept Modifier: Patient Orientation Modifier = supine (F-10340, SRT)

**Table Longitudinal Position:**

27.9000000000000 mm

**Table Lateral Position:**

1681.4 mm

**Table Head Tilt Angle:**

0 deg

**Table Cradle Tilt Angle:**

0 deg

**Target Region:**

Abdomen (T-D400, SRT)

**Number of Frames:**

121 1

**SubImages per Frame:**

1 1

**Wedges and Shutters****Bottom Shutter:**

144 mm

**Left Shutter:**

144 mm

**Right Shutter:**

144 mm

**Top Shutter:**

144 mm

**Beam Position**

**Longitudinal Beam Position:**

1156.000000000000 mm

**Beam Angle:**

0 deg

**Table Height Position:**

885 mm

## Irradiation Event X-Ray Data

Concept Modifier: Acquisition Plane = Single Plane (113622, DCM)

**DateTime Started:**

2014-03-13 16:17:00

**Irradiation Event Type:**

Fluoroscopy (P5-06000, SRT)

**Reference Point Definition:**

15cm below BeamIsocenter

**Irradiation Event UID:**

1.3.46.670589.28.961600801528.20140313161659530.1

**Dose Area Product:**

1.9583752330E-05 Gy.m2

**Dose (RP):**

0.00055325987144 Gy

**Positioner Primary Angle:**

-0.4 deg

**Positioner Secondary Angle:**

0.1 deg

### X-Ray Filters

**X-Ray Filter Type:**

Strip filter (113650, DCM)

**X-Ray Filter Material:**

Copper or Copper compound (C-127F9, SRT)

**X-Ray Filter Thickness Minimum:**

0.4 mm

**X-Ray Filter Thickness Maximum:**

0.4 mm

### X-Ray Filters

**X-Ray Filter Type:**

Strip filter (113650, DCM)

**X-Ray Filter Material:**

Aluminum or Aluminum compound (C-120F9, SRT)

**X-Ray Filter Thickness Minimum:**

1 mm

**X-Ray Filter Thickness Maximum:**

1 mm

**Fluoro Mode:**

Pulsed (113631, DCM)

**Pulse Rate:**

15 {pulse}/s

**Number of Pulses:**

50 1

**X-Ray Tube Current:**

43.9 mA

**Distance Source to Isocenter:**

810 mm

**KVP:**

109.5 kV

**Pulse Width:**

4 ms

**Irradiation Duration:**

3.333 s

**Patient Table Relationship:**

headfirst (F-10470, SRT)

**Patient Orientation:**

recumbent (F-10450, SRT)

Concept Modifier: Patient Orientation Modifier = supine (F-10340, SRT)

**Table Longitudinal Position:**

27.9000000000000 mm

**Table Lateral Position:**

1681.4 mm

**Table Head Tilt Angle:**

0 deg

**Table Cradle Tilt Angle:**

0 deg

**Target Region:**

Abdomen (T-D400, SRT)

**Number of Frames:**

50 1

**SubImages per Frame:**

1 1

**Wedges and Shutters****Bottom Shutter:**

144 mm

**Left Shutter:**

144 mm

**Right Shutter:**

144 mm

**Top Shutter:**

144 mm

**Beam Position**

**Longitudinal Beam Position:**

1156.000000000000 mm

**Beam Angle:**

0 deg

**Table Height Position:**

885 mm

## Irradiation Event X-Ray Data

Concept Modifier: Acquisition Plane = Single Plane (113622, DCM)

**DateTime Started:**

2014-03-13 16:17:05

**Irradiation Event Type:**

Fluoroscopy (P5-06000, SRT)

**Reference Point Definition:**

15cm below BeamIsocenter

**Irradiation Event UID:**

1.3.46.670589.28.961600801528.20140313161705327.1

**Dose Area Product:**

1.9608226377E-05 Gy.m2

**Dose (RP):**

0.00059458218549 Gy

**Positioner Primary Angle:**

-0.4 deg

**Positioner Secondary Angle:**

0.1 deg

### X-Ray Filters

**X-Ray Filter Type:**

Strip filter (113650, DCM)

**X-Ray Filter Material:**

Copper or Copper compound (C-127F9, SRT)

**X-Ray Filter Thickness Minimum:**

0.4 mm

**X-Ray Filter Thickness Maximum:**

0.4 mm

### X-Ray Filters

**X-Ray Filter Type:**

Strip filter (113650, DCM)

**X-Ray Filter Material:**

Aluminum or Aluminum compound (C-120F9, SRT)

**X-Ray Filter Thickness Minimum:**

1 mm

**X-Ray Filter Thickness Maximum:**

1 mm

**Fluoro Mode:**

Pulsed (113631, DCM)

**Pulse Rate:**

15 {pulse}/s

**Number of Pulses:**

55 1

**X-Ray Tube Current:**

43.7 mA

**Distance Source to Isocenter:**

810 mm

**KVP:**

110.03 kV

**Pulse Width:**

4 ms

**Irradiation Duration:**

3.666 s

**Patient Table Relationship:**

headfirst (F-10470, SRT)

**Patient Orientation:**

recumbent (F-10450, SRT)

Concept Modifier: Patient Orientation Modifier = supine (F-10340, SRT)

**Table Longitudinal Position:**

27.9000000000000 mm

**Table Lateral Position:**

1681.4 mm

**Table Head Tilt Angle:**

0 deg

**Table Cradle Tilt Angle:**

0 deg

**Target Region:**

Abdomen (T-D400, SRT)

**Number of Frames:**

55 1

**SubImages per Frame:**

1 1

**Wedges and Shutters****Bottom Shutter:**

144 mm

**Left Shutter:**

144 mm

**Right Shutter:**

144 mm

**Top Shutter:**

144 mm

**Beam Position**

**Longitudinal Beam Position:**

1156.000000000000 mm

**Beam Angle:**

0 deg

**Table Height Position:**

885 mm

## Irradiation Event X-Ray Data

Concept Modifier: Acquisition Plane = Single Plane (113622, DCM)

**DateTime Started:**

2014-03-13 16:17:11

**Irradiation Event Type:**

Fluoroscopy (P5-06000, SRT)

**Reference Point Definition:**

15cm below BeamIsocenter

**Irradiation Event UID:**

1.3.46.670589.28.961600801528.20140313161710936.1

**Dose Area Product:**

6.2734676560E-05 Gy.m2

**Dose (RP):**

0.00173094582185 Gy

**Positioner Primary Angle:**

-0.4 deg

**Positioner Secondary Angle:**

0.1 deg

### X-Ray Filters

**X-Ray Filter Type:**

Strip filter (113650, DCM)

**X-Ray Filter Material:**

Copper or Copper compound (C-127F9, SRT)

**X-Ray Filter Thickness Minimum:**

0.4 mm

**X-Ray Filter Thickness Maximum:**

0.4 mm

### X-Ray Filters

**X-Ray Filter Type:**

Strip filter (113650, DCM)

**X-Ray Filter Material:**

Aluminum or Aluminum compound (C-120F9, SRT)

**X-Ray Filter Thickness Minimum:**

1 mm

**X-Ray Filter Thickness Maximum:**

1 mm



**Fluoro Mode:**

Pulsed (113631, DCM)

**Pulse Rate:**

15 {pulse}/s

**Number of Pulses:**

159 1

**X-Ray Tube Current:**

44 mA

**Distance Source to Isocenter:**

810 mm

**KVP:**

109.23 kV

**Pulse Width:**

4 ms

**Irradiation Duration:**

10.599 s

**Patient Table Relationship:**

headfirst (F-10470, SRT)

**Patient Orientation:**

recumbent (F-10450, SRT)

Concept Modifier: Patient Orientation Modifier = supine (F-10340, SRT)

**Table Longitudinal Position:**

27.9000000000000 mm

**Table Lateral Position:**

1681.4 mm

**Table Head Tilt Angle:**

0 deg

**Table Cradle Tilt Angle:**

0 deg

**Target Region:**

Abdomen (T-D400, SRT)

**Number of Frames:**

159 1

**SubImages per Frame:**

1 1

**Wedges and Shutters****Bottom Shutter:**

144 mm

**Left Shutter:**

144 mm

**Right Shutter:**

144 mm

**Top Shutter:**

144 mm

**Beam Position**

**Longitudinal Beam Position:**

1156.000000000000 mm

**Beam Angle:**

0 deg

**Table Height Position:**

885 mm

## Irradiation Event X-Ray Data

Concept Modifier: Acquisition Plane = Single Plane (113622, DCM)

**DateTime Started:**

2014-03-13 16:17:23

**Irradiation Event Type:**

Fluoroscopy (P5-06000, SRT)

**Reference Point Definition:**

15cm below BeamIsocenter

**Irradiation Event UID:**

1.3.46.670589.28.961600801528.20140313161723202.1

**Dose Area Product:**

0.00010512489425 Gy.m2

**Dose (RP):**

0.00299586776859 Gy

**Positioner Primary Angle:**

-0.4 deg

**Positioner Secondary Angle:**

0.1 deg

### X-Ray Filters

**X-Ray Filter Type:**

Strip filter (113650, DCM)

**X-Ray Filter Material:**

Copper or Copper compound (C-127F9, SRT)

**X-Ray Filter Thickness Minimum:**

0.4 mm

**X-Ray Filter Thickness Maximum:**

0.4 mm

### X-Ray Filters

**X-Ray Filter Type:**

Strip filter (113650, DCM)

**X-Ray Filter Material:**

Aluminum or Aluminum compound (C-120F9, SRT)

**X-Ray Filter Thickness Minimum:**

1 mm

**X-Ray Filter Thickness Maximum:**

1 mm

**Fluoro Mode:**

Pulsed (113631, DCM)

**Pulse Rate:**

15 {pulse}/s

**Number of Pulses:**

271 1

**X-Ray Tube Current:**

44.4 mA

**Distance Source to Isocenter:**

810 mm

**KVP:**

108.43 kV

**Pulse Width:**

4 ms

**Irradiation Duration:**

18.066 s

**Patient Table Relationship:**

headfirst (F-10470, SRT)

**Patient Orientation:**

recumbent (F-10450, SRT)

Concept Modifier: Patient Orientation Modifier = supine (F-10340, SRT)

**Table Longitudinal Position:**

27.9000000000000 mm

**Table Lateral Position:**

1681.4 mm

**Table Head Tilt Angle:**

0 deg

**Table Cradle Tilt Angle:**

0 deg

**Target Region:**

Abdomen (T-D400, SRT)

**Number of Frames:**

271 1

**SubImages per Frame:**

1 1

**Wedges and Shutters****Bottom Shutter:**

144 mm

**Left Shutter:**

144 mm

**Right Shutter:**

144 mm

**Top Shutter:**

144 mm

**Beam Position**

**Longitudinal Beam Position:**

1156.000000000000 mm

**Beam Angle:**

0 deg

**Table Height Position:**

885 mm

## Irradiation Event X-Ray Data

Concept Modifier: Acquisition Plane = Single Plane (113622, DCM)

**DateTime Started:**

2014-03-13 16:17:43

**Irradiation Event Type:**

Fluoroscopy (P5-06000, SRT)

**Reference Point Definition:**

15cm below BeamIsocenter

**Irradiation Event UID:**

1.3.46.670589.28.961600801528.20140313161743139.1

**Dose Area Product:**

7.2681034861E-06 Gy.m2

**Dose (RP):**

0.00018595041322 Gy

**Positioner Primary Angle:**

-0.4 deg

**Positioner Secondary Angle:**

0.1 deg

### X-Ray Filters

**X-Ray Filter Type:**

Strip filter (113650, DCM)

**X-Ray Filter Material:**

Copper or Copper compound (C-127F9, SRT)

**X-Ray Filter Thickness Minimum:**

0.4 mm

**X-Ray Filter Thickness Maximum:**

0.4 mm

### X-Ray Filters

**X-Ray Filter Type:**

Strip filter (113650, DCM)

**X-Ray Filter Material:**

Aluminum or Aluminum compound (C-120F9, SRT)

**X-Ray Filter Thickness Minimum:**

1 mm

**X-Ray Filter Thickness Maximum:**

1 mm

**Fluoro Mode:**

Pulsed (113631, DCM)

**Pulse Rate:**

15 {pulse}/s

**Number of Pulses:**

18 1

**X-Ray Tube Current:**

43.5 mA

**Distance Source to Isocenter:**

810 mm

**KVP:**

110.46 kV

**Pulse Width:**

4 ms

**Irradiation Duration:**

1.2 s

**Patient Table Relationship:**

headfirst (F-10470, SRT)

**Patient Orientation:**

recumbent (F-10450, SRT)

Concept Modifier: Patient Orientation Modifier = supine (F-10340, SRT)

**Table Longitudinal Position:**

27.9000000000000 mm

**Table Lateral Position:**

1681.4 mm

**Table Head Tilt Angle:**

0 deg

**Table Cradle Tilt Angle:**

0 deg

**Target Region:**

Abdomen (T-D400, SRT)

**Number of Frames:**

18 1

**SubImages per Frame:**

1 1

**Wedges and Shutters****Bottom Shutter:**

144 mm

**Left Shutter:**

144 mm

**Right Shutter:**

144 mm

**Top Shutter:**

144 mm

**Beam Position**

**Longitudinal Beam Position:**

1156.000000000000 mm

**Beam Angle:**

0 deg

**Table Height Position:**

885 mm

## Irradiation Event X-Ray Data

Concept Modifier: Acquisition Plane = Single Plane (113622, DCM)

**DateTime Started:**

2014-03-13 16:17:46

**Irradiation Event Type:**

Fluoroscopy (P5-06000, SRT)

**Reference Point Definition:**

15cm below BeamIsocenter

**Irradiation Event UID:**

1.3.46.670589.28.961600801528.20140313161745795.1

**Dose Area Product:**

4.5431212248E-05 Gy.m2

**Dose (RP):**

0.00124655647382 Gy

**Positioner Primary Angle:**

-0.4 deg

**Positioner Secondary Angle:**

0.1 deg

### X-Ray Filters

**X-Ray Filter Type:**

Strip filter (113650, DCM)

**X-Ray Filter Material:**

Copper or Copper compound (C-127F9, SRT)

**X-Ray Filter Thickness Minimum:**

0.4 mm

**X-Ray Filter Thickness Maximum:**

0.4 mm

### X-Ray Filters

**X-Ray Filter Type:**

Strip filter (113650, DCM)

**X-Ray Filter Material:**

Aluminum or Aluminum compound (C-120F9, SRT)

**X-Ray Filter Thickness Minimum:**

1 mm

**X-Ray Filter Thickness Maximum:**

1 mm

**Fluoro Mode:**

Pulsed (113631, DCM)

**Pulse Rate:**

15 {pulse}/s

**Number of Pulses:**

115 1

**X-Ray Tube Current:**

44 mA

**Distance Source to Isocenter:**

810 mm

**KVP:**

109.39 kV

**Pulse Width:**

4 ms

**Irradiation Duration:**

7.666 s

**Patient Table Relationship:**

headfirst (F-10470, SRT)

**Patient Orientation:**

recumbent (F-10450, SRT)

Concept Modifier: Patient Orientation Modifier = supine (F-10340, SRT)

**Table Longitudinal Position:**

27.9000000000000 mm

**Table Lateral Position:**

1681.4 mm

**Table Head Tilt Angle:**

0 deg

**Table Cradle Tilt Angle:**

0 deg

**Target Region:**

Abdomen (T-D400, SRT)

**Number of Frames:**

115 1

**SubImages per Frame:**

1 1

**Wedges and Shutters****Bottom Shutter:**

144 mm

**Left Shutter:**

144 mm

**Right Shutter:**

144 mm

**Top Shutter:**

144 mm

**Beam Position**

**Longitudinal Beam Position:**

1156.000000000000 mm

**Beam Angle:**

0 deg

**Table Height Position:**

885 mm

## Irradiation Event X-Ray Data

Concept Modifier: Acquisition Plane = Single Plane (113622, DCM)

**DateTime Started:**

2014-03-13 16:17:56

**Irradiation Event Type:**

Fluoroscopy (P5-06000, SRT)

**Reference Point Definition:**

15cm below BeamIsocenter

**Irradiation Event UID:**

1.3.46.670589.28.961600801528.20140313161755764.1

**Dose Area Product:**

2.0814225491E-05 Gy.m2

**Dose (RP):**

0.00058539944903 Gy

**Positioner Primary Angle:**

-0.4 deg

**Positioner Secondary Angle:**

0.1 deg

### X-Ray Filters

**X-Ray Filter Type:**

Strip filter (113650, DCM)

**X-Ray Filter Material:**

Copper or Copper compound (C-127F9, SRT)

**X-Ray Filter Thickness Minimum:**

0.4 mm

**X-Ray Filter Thickness Maximum:**

0.4 mm

### X-Ray Filters

**X-Ray Filter Type:**

Strip filter (113650, DCM)

**X-Ray Filter Material:**

Aluminum or Aluminum compound (C-120F9, SRT)

**X-Ray Filter Thickness Minimum:**

1 mm

**X-Ray Filter Thickness Maximum:**

1 mm



**Fluoro Mode:**

Pulsed (113631, DCM)

**Pulse Rate:**

15 {pulse}/s

**Number of Pulses:**

52 1

**X-Ray Tube Current:**

43.8 mA

**Distance Source to Isocenter:**

810 mm

**KVP:**

109.82 kV

**Pulse Width:**

4 ms

**Irradiation Duration:**

3.466 s

**Patient Table Relationship:**

headfirst (F-10470, SRT)

**Patient Orientation:**

recumbent (F-10450, SRT)

Concept Modifier: Patient Orientation Modifier = supine (F-10340, SRT)

**Table Longitudinal Position:**

27.9000000000000 mm

**Table Lateral Position:**

1681.4 mm

**Table Head Tilt Angle:**

0 deg

**Table Cradle Tilt Angle:**

0 deg

**Target Region:**

Abdomen (T-D400, SRT)

**Number of Frames:**

52 1

**SubImages per Frame:**

1 1

**Wedges and Shutters****Bottom Shutter:**

144 mm

**Left Shutter:**

144 mm

**Right Shutter:**

144 mm

**Top Shutter:**

144 mm

**Beam Position**

**Longitudinal Beam Position:**

1156.000000000000 mm

**Beam Angle:**

0 deg

**Table Height Position:**

885 mm

## Irradiation Event X-Ray Data

Concept Modifier: Acquisition Plane = Single Plane (113622, DCM)

**DateTime Started:**

2014-03-13 16:18:02

**Irradiation Event Type:**

Fluoroscopy (P5-06000, SRT)

**Reference Point Definition:**

15cm below BeamIsocenter

**Irradiation Event UID:**

1.3.46.670589.28.961600801528.20140313161802170.1

**Dose Area Product:**

2.9094651533E-05 Gy.m2

**Dose (RP):**

0.00085629017447 Gy

**Positioner Primary Angle:**

-0.4 deg

**Positioner Secondary Angle:**

0.1 deg

### X-Ray Filters

**X-Ray Filter Type:**

Strip filter (113650, DCM)

**X-Ray Filter Material:**

Copper or Copper compound (C-127F9, SRT)

**X-Ray Filter Thickness Minimum:**

0.4 mm

**X-Ray Filter Thickness Maximum:**

0.4 mm

### X-Ray Filters

**X-Ray Filter Type:**

Strip filter (113650, DCM)

**X-Ray Filter Material:**

Aluminum or Aluminum compound (C-120F9, SRT)

**X-Ray Filter Thickness Minimum:**

1 mm

**X-Ray Filter Thickness Maximum:**

1 mm

**Fluoro Mode:**

Pulsed (113631, DCM)

**Pulse Rate:**

15 {pulse}/s

**Number of Pulses:**

74 1

**X-Ray Tube Current:**

43.9 mA

**Distance Source to Isocenter:**

810 mm

**KVP:**

109.6 kV

**Pulse Width:**

4 ms

**Irradiation Duration:**

4.933 s

**Patient Table Relationship:**

headfirst (F-10470, SRT)

**Patient Orientation:**

recumbent (F-10450, SRT)

Concept Modifier: Patient Orientation Modifier = supine (F-10340, SRT)

**Table Longitudinal Position:**

27.9000000000000 mm

**Table Lateral Position:**

1681.4 mm

**Table Head Tilt Angle:**

0 deg

**Table Cradle Tilt Angle:**

0 deg

**Target Region:**

Abdomen (T-D400, SRT)

**Number of Frames:**

74 1

**SubImages per Frame:**

1 1

**Wedges and Shutters****Bottom Shutter:**

144 mm

**Left Shutter:**

144 mm

**Right Shutter:**

144 mm

**Top Shutter:**

144 mm

**Beam Position**

**Longitudinal Beam Position:**

1156.000000000000 mm

**Beam Angle:**

0 deg

**Table Height Position:**

885 mm

## Irradiation Event X-Ray Data

Concept Modifier: Acquisition Plane = Single Plane (113622, DCM)

**DateTime Started:**

2014-03-13 16:18:09

**Irradiation Event Type:**

Fluoroscopy (P5-06000, SRT)

**Reference Point Definition:**

15cm below BeamIsocenter

**Irradiation Event UID:**

1.3.46.670589.28.961600801528.20140313161809295.1

**Dose Area Product:**

0.00010273444596 Gy.m2

**Dose (RP):**

0.00300734618916 Gy

**Positioner Primary Angle:**

-0.4 deg

**Positioner Secondary Angle:**

0.1 deg

### X-Ray Filters

**X-Ray Filter Type:**

Strip filter (113650, DCM)

**X-Ray Filter Material:**

Copper or Copper compound (C-127F9, SRT)

**X-Ray Filter Thickness Minimum:**

0.4 mm

**X-Ray Filter Thickness Maximum:**

0.4 mm

### X-Ray Filters

**X-Ray Filter Type:**

Strip filter (113650, DCM)

**X-Ray Filter Material:**

Aluminum or Aluminum compound (C-120F9, SRT)

**X-Ray Filter Thickness Minimum:**

1 mm

**X-Ray Filter Thickness Maximum:**

1 mm

**Fluoro Mode:**

Pulsed (113631, DCM)

**Pulse Rate:**

15 {pulse}/s

**Number of Pulses:**

262 1

**X-Ray Tube Current:**

44 mA

**Distance Source to Isocenter:**

810 mm

**KVP:**

109.28 kV

**Pulse Width:**

4 ms

**Irradiation Duration:**

17.466 s

**Patient Table Relationship:**

headfirst (F-10470, SRT)

**Patient Orientation:**

recumbent (F-10450, SRT)

Concept Modifier: Patient Orientation Modifier = supine (F-10340, SRT)

**Table Longitudinal Position:**

27.9000000000000 mm

**Table Lateral Position:**

1681.4 mm

**Table Head Tilt Angle:**

0 deg

**Table Cradle Tilt Angle:**

0 deg

**Target Region:**

Abdomen (T-D400, SRT)

**Number of Frames:**

262 1

**SubImages per Frame:**

1 1

**Wedges and Shutters****Bottom Shutter:**

144 mm

**Left Shutter:**

144 mm

**Right Shutter:**

144 mm

**Top Shutter:**

144 mm

**Beam Position**

**Longitudinal Beam Position:**

1156.000000000000 mm

**Beam Angle:**

0 deg

**Table Height Position:**

885 mm

## Irradiation Event X-Ray Data

Concept Modifier: Acquisition Plane = Single Plane (113622, DCM)

**DateTime Started:**

2014-03-13 16:18:30

**Irradiation Event Type:**

Fluoroscopy (P5-06000, SRT)

**Reference Point Definition:**

15cm below BeamIsocenter

**Irradiation Event UID:**

1.3.46.670589.28.961600801528.20140313161829748.1

**Dose Area Product:**

1.3348958525E-05 Gy.m2

**Dose (RP):**

0.00039256198347 Gy

**Positioner Primary Angle:**

-0.4 deg

**Positioner Secondary Angle:**

0.1 deg

### X-Ray Filters

**X-Ray Filter Type:**

Strip filter (113650, DCM)

**X-Ray Filter Material:**

Copper or Copper compound (C-127F9, SRT)

**X-Ray Filter Thickness Minimum:**

0.4 mm

**X-Ray Filter Thickness Maximum:**

0.4 mm

### X-Ray Filters

**X-Ray Filter Type:**

Strip filter (113650, DCM)

**X-Ray Filter Material:**

Aluminum or Aluminum compound (C-120F9, SRT)

**X-Ray Filter Thickness Minimum:**

1 mm

**X-Ray Filter Thickness Maximum:**

1 mm

**Fluoro Mode:**

Pulsed (113631, DCM)

**Pulse Rate:**

15 {pulse}/s

**Number of Pulses:**

34 1

**X-Ray Tube Current:**

43.9 mA

**Distance Source to Isocenter:**

810 mm

**KVP:**

109.6 kV

**Pulse Width:**

4 ms

**Irradiation Duration:**

2.266 s

**Patient Table Relationship:**

headfirst (F-10470, SRT)

**Patient Orientation:**

recumbent (F-10450, SRT)

Concept Modifier: Patient Orientation Modifier = supine (F-10340, SRT)

**Table Longitudinal Position:**

27.9000000000000 mm

**Table Lateral Position:**

1681.4 mm

**Table Head Tilt Angle:**

0 deg

**Table Cradle Tilt Angle:**

0 deg

**Target Region:**

Abdomen (T-D400, SRT)

**Number of Frames:**

34 1

**SubImages per Frame:**

1 1

**Wedges and Shutters****Bottom Shutter:**

144 mm

**Left Shutter:**

144 mm

**Right Shutter:**

144 mm

**Top Shutter:**

144 mm

**Beam Position**

**Longitudinal Beam Position:**

1156.000000000000 mm

**Beam Angle:**

0 deg

**Table Height Position:**

885 mm

## Irradiation Event X-Ray Data

Concept Modifier: Acquisition Plane = Single Plane (113622, DCM)

**DateTime Started:**

2014-03-13 16:18:34

**Irradiation Event Type:**

Fluoroscopy (P5-06000, SRT)

**Reference Point Definition:**

15cm below BeamIsocenter

**Irradiation Event UID:**

1.3.46.670589.28.961600801528.20140313161833967.1

**Dose Area Product:**

3.6951799798E-05 Gy.m2

**Dose (RP):**

0.00106749311294 Gy

**Positioner Primary Angle:**

-0.4 deg

**Positioner Secondary Angle:**

0.1 deg

### X-Ray Filters

**X-Ray Filter Type:**

Strip filter (113650, DCM)

**X-Ray Filter Material:**

Copper or Copper compound (C-127F9, SRT)

**X-Ray Filter Thickness Minimum:**

0.4 mm

**X-Ray Filter Thickness Maximum:**

0.4 mm

### X-Ray Filters

**X-Ray Filter Type:**

Strip filter (113650, DCM)

**X-Ray Filter Material:**

Aluminum or Aluminum compound (C-120F9, SRT)

**X-Ray Filter Thickness Minimum:**

1 mm

**X-Ray Filter Thickness Maximum:**

1 mm



**Fluoro Mode:**

Pulsed (113631, DCM)

**Pulse Rate:**

15 {pulse}/s

**Number of Pulses:**

93 1

**X-Ray Tube Current:**

44.1 mA

**Distance Source to Isocenter:**

810 mm

**KVP:**

109.12 kV

**Pulse Width:**

4 ms

**Irradiation Duration:**

6.199 s

**Patient Table Relationship:**

headfirst (F-10470, SRT)

**Patient Orientation:**

recumbent (F-10450, SRT)

Concept Modifier: Patient Orientation Modifier = supine (F-10340, SRT)

**Table Longitudinal Position:**

27.9000000000000 mm

**Table Lateral Position:**

1681.4 mm

**Table Head Tilt Angle:**

0 deg

**Table Cradle Tilt Angle:**

0 deg

**Target Region:**

Abdomen (T-D400, SRT)

**Number of Frames:**

93 1

**SubImages per Frame:**

1 1

**Wedges and Shutters****Bottom Shutter:**

144 mm

**Left Shutter:**

144 mm

**Right Shutter:**

144 mm

**Top Shutter:**

144 mm

**Beam Position**

**Longitudinal Beam Position:**

1156.000000000000 mm

**Beam Angle:**

0 deg

**Table Height Position:**

885 mm

## Irradiation Event X-Ray Data

Concept Modifier: Acquisition Plane = Single Plane (113622, DCM)

**DateTime Started:**

2014-03-13 16:18:44

**Irradiation Event Type:**

Fluoroscopy (P5-06000, SRT)

**Reference Point Definition:**

15cm below BeamIsocenter

**Irradiation Event UID:**

1.3.46.670589.28.961600801528.20140313161844185.1

**Dose Area Product:**

7.0934130152E-05 Gy.m2

**Dose (RP):**

0.00205234159779 Gy

**Positioner Primary Angle:**

-0.4 deg

**Positioner Secondary Angle:**

0.1 deg

### X-Ray Filters

**X-Ray Filter Type:**

Strip filter (113650, DCM)

**X-Ray Filter Material:**

Copper or Copper compound (C-127F9, SRT)

**X-Ray Filter Thickness Minimum:**

0.4 mm

**X-Ray Filter Thickness Maximum:**

0.4 mm

### X-Ray Filters

**X-Ray Filter Type:**

Strip filter (113650, DCM)

**X-Ray Filter Material:**

Aluminum or Aluminum compound (C-120F9, SRT)

**X-Ray Filter Thickness Minimum:**

1 mm

**X-Ray Filter Thickness Maximum:**

1 mm

**Fluoro Mode:**

Pulsed (113631, DCM)

**Pulse Rate:**

15 {pulse}/s

**Number of Pulses:**

183 1

**X-Ray Tube Current:**

44.2 mA

**Distance Source to Isocenter:**

810 mm

**KVP:**

108.8 kV

**Pulse Width:**

4 ms

**Irradiation Duration:**

12.199 s

**Patient Table Relationship:**

headfirst (F-10470, SRT)

**Patient Orientation:**

recumbent (F-10450, SRT)

Concept Modifier: Patient Orientation Modifier = supine (F-10340, SRT)

**Table Longitudinal Position:**

27.9000000000000 mm

**Table Lateral Position:**

1681.4 mm

**Table Head Tilt Angle:**

0 deg

**Table Cradle Tilt Angle:**

0 deg

**Target Region:**

Abdomen (T-D400, SRT)

**Number of Frames:**

183 1

**SubImages per Frame:**

1 1

**Wedges and Shutters****Bottom Shutter:**

144 mm

**Left Shutter:**

144 mm

**Right Shutter:**

144 mm

**Top Shutter:**

144 mm

**Beam Position**

**Longitudinal Beam Position:**

1156.000000000000 mm

**Beam Angle:**

0 deg

**Table Height Position:**

885 mm

## Irradiation Event X-Ray Data

Concept Modifier: Acquisition Plane = Single Plane (113622, DCM)

**DateTime Started:**

2014-03-13 16:18:59

**Irradiation Event Type:**

Fluoroscopy (P5-06000, SRT)

**Reference Point Definition:**

15cm below BeamIsocenter

**Irradiation Event UID:**

1.3.46.670589.28.961600801528.20140313161858967.1

**Dose Area Product:**

4.7031706800E-05 Gy.m2

**Dose (RP):**

0.00129935720844 Gy

**Positioner Primary Angle:**

-0.4 deg

**Positioner Secondary Angle:**

0.1 deg

### X-Ray Filters

**X-Ray Filter Type:**

Strip filter (113650, DCM)

**X-Ray Filter Material:**

Copper or Copper compound (C-127F9, SRT)

**X-Ray Filter Thickness Minimum:**

0.4 mm

**X-Ray Filter Thickness Maximum:**

0.4 mm

### X-Ray Filters

**X-Ray Filter Type:**

Strip filter (113650, DCM)

**X-Ray Filter Material:**

Aluminum or Aluminum compound (C-120F9, SRT)

**X-Ray Filter Thickness Minimum:**

1 mm

**X-Ray Filter Thickness Maximum:**

1 mm

**Fluoro Mode:**

Pulsed (113631, DCM)

**Pulse Rate:**

15 {pulse}/s

**Number of Pulses:**

119 1

**X-Ray Tube Current:**

43.9 mA

**Distance Source to Isocenter:**

810 mm

**KVP:**

109.6 kV

**Pulse Width:**

4 ms

**Irradiation Duration:**

7.933 s

**Patient Table Relationship:**

headfirst (F-10470, SRT)

**Patient Orientation:**

recumbent (F-10450, SRT)

Concept Modifier: Patient Orientation Modifier = supine (F-10340, SRT)

**Table Longitudinal Position:**

27.9000000000000 mm

**Table Lateral Position:**

1681.4 mm

**Table Head Tilt Angle:**

0 deg

**Table Cradle Tilt Angle:**

0 deg

**Target Region:**

Abdomen (T-D400, SRT)

**Number of Frames:**

119 1

**SubImages per Frame:**

1 1

**Wedges and Shutters****Bottom Shutter:**

144 mm

**Left Shutter:**

144 mm

**Right Shutter:**

144 mm

**Top Shutter:**

144 mm

**Beam Position**

**Longitudinal Beam Position:**

1156.000000000000 mm

**Beam Angle:**

0 deg

**Table Height Position:**

885 mm

## Irradiation Event X-Ray Data

Concept Modifier: Acquisition Plane = Single Plane (113622, DCM)

**DateTime Started:**

2014-03-13 16:19:09

**Irradiation Event Type:**

Fluoroscopy (P5-06000, SRT)

**Reference Point Definition:**

15cm below BeamIsocenter

**Irradiation Event UID:**

1.3.46.670589.28.961600801528.20140313161908638.1

**Dose Area Product:**

3.5359749384E-05 Gy.m2

**Dose (RP):**

0.00101010101010 Gy

**Positioner Primary Angle:**

-0.4 deg

**Positioner Secondary Angle:**

0.1 deg

### X-Ray Filters

**X-Ray Filter Type:**

Strip filter (113650, DCM)

**X-Ray Filter Material:**

Copper or Copper compound (C-127F9, SRT)

**X-Ray Filter Thickness Minimum:**

0.4 mm

**X-Ray Filter Thickness Maximum:**

0.4 mm

### X-Ray Filters

**X-Ray Filter Type:**

Strip filter (113650, DCM)

**X-Ray Filter Material:**

Aluminum or Aluminum compound (C-120F9, SRT)

**X-Ray Filter Thickness Minimum:**

1 mm

**X-Ray Filter Thickness Maximum:**

1 mm

**Fluoro Mode:**

Pulsed (113631, DCM)

**Pulse Rate:**

15 {pulse}/s

**Number of Pulses:**

89 1

**X-Ray Tube Current:**

43.8 mA

**Distance Source to Isocenter:**

810 mm

**KVP:**

109.71 kV

**Pulse Width:**

4 ms

**Irradiation Duration:**

5.933 s

**Patient Table Relationship:**

headfirst (F-10470, SRT)

**Patient Orientation:**

recumbent (F-10450, SRT)

Concept Modifier: Patient Orientation Modifier = supine (F-10340, SRT)

**Table Longitudinal Position:**

27.9000000000000 mm

**Table Lateral Position:**

1681.4 mm

**Table Head Tilt Angle:**

0 deg

**Table Cradle Tilt Angle:**

0 deg

**Target Region:**

Abdomen (T-D400, SRT)

**Number of Frames:**

89 1

**SubImages per Frame:**

1 1

**Wedges and Shutters****Bottom Shutter:**

144 mm

**Left Shutter:**

144 mm

**Right Shutter:**

144 mm

**Top Shutter:**

144 mm

**Beam Position**

**Longitudinal Beam Position:**

1156.000000000000 mm

**Beam Angle:**

0 deg

**Table Height Position:**

885 mm

## Irradiation Event X-Ray Data

Concept Modifier: Acquisition Plane = Single Plane (113622, DCM)

**DateTime Started:**

2014-03-13 16:19:20

**Irradiation Event Type:**

Fluoroscopy (P5-06000, SRT)

**Reference Point Definition:**

15cm below BeamIsocenter

**Irradiation Event UID:**

1.3.46.670589.28.961600801528.20140313161919560.1

**Dose Area Product:**

1.2180737242E-05 Gy.m2

**Dose (RP):**

0.00034435261707 Gy

**Positioner Primary Angle:**

-0.4 deg

**Positioner Secondary Angle:**

0.1 deg

### X-Ray Filters

**X-Ray Filter Type:**

Strip filter (113650, DCM)

**X-Ray Filter Material:**

Copper or Copper compound (C-127F9, SRT)

**X-Ray Filter Thickness Minimum:**

0.4 mm

**X-Ray Filter Thickness Maximum:**

0.4 mm

### X-Ray Filters

**X-Ray Filter Type:**

Strip filter (113650, DCM)

**X-Ray Filter Material:**

Aluminum or Aluminum compound (C-120F9, SRT)

**X-Ray Filter Thickness Minimum:**

1 mm

**X-Ray Filter Thickness Maximum:**

1 mm



**Fluoro Mode:**

Pulsed (113631, DCM)

**Pulse Rate:**

15 {pulse}/s

**Number of Pulses:**

31 1

**X-Ray Tube Current:**

43.8 mA

**Distance Source to Isocenter:**

810 mm

**KVP:**

109.71 kV

**Pulse Width:**

4 ms

**Irradiation Duration:**

2.066 s

**Patient Table Relationship:**

headfirst (F-10470, SRT)

**Patient Orientation:**

recumbent (F-10450, SRT)

Concept Modifier: Patient Orientation Modifier = supine (F-10340, SRT)

**Table Longitudinal Position:**

27.9000000000000 mm

**Table Lateral Position:**

1681.4 mm

**Table Head Tilt Angle:**

0 deg

**Table Cradle Tilt Angle:**

0 deg

**Target Region:**

Abdomen (T-D400, SRT)

**Number of Frames:**

31 1

**SubImages per Frame:**

1 1

**Wedges and Shutters****Bottom Shutter:**

144 mm

**Left Shutter:**

144 mm

**Right Shutter:**

144 mm

**Top Shutter:**

144 mm

**Beam Position**

**Longitudinal Beam Position:**

1156.000000000000 mm

**Beam Angle:**

0 deg

**Table Height Position:**

885 mm

## Irradiation Event X-Ray Data

Concept Modifier: Acquisition Plane = Single Plane (113622, DCM)

**DateTime Started:**

2014-03-13 16:20:33

**Irradiation Event Type:**

Fluoroscopy (P5-06000, SRT)

**Reference Point Definition:**

15cm below BeamIsocenter

**Irradiation Event UID:**

1.3.46.670589.28.961600801528.20140313162032857.1

**Dose Area Product:**

8.7061416073E-06 Gy.m2

**Dose (RP):**

0.00023645546372 Gy

**Positioner Primary Angle:**

-0.4 deg

**Positioner Secondary Angle:**

0.1 deg

### X-Ray Filters

**X-Ray Filter Type:**

Strip filter (113650, DCM)

**X-Ray Filter Material:**

Copper or Copper compound (C-127F9, SRT)

**X-Ray Filter Thickness Minimum:**

0.4 mm

**X-Ray Filter Thickness Maximum:**

0.4 mm

### X-Ray Filters

**X-Ray Filter Type:**

Strip filter (113650, DCM)

**X-Ray Filter Material:**

Aluminum or Aluminum compound (C-120F9, SRT)

**X-Ray Filter Thickness Minimum:**

1 mm

**X-Ray Filter Thickness Maximum:**

1 mm

**Fluoro Mode:**

Pulsed (113631, DCM)

**Pulse Rate:**

15 {pulse}/s

**Number of Pulses:**

22 1

**X-Ray Tube Current:**

43.7 mA

**Distance Source to Isocenter:**

810 mm

**KVP:**

110.08 kV

**Pulse Width:**

4 ms

**Irradiation Duration:**

1.466 s

**Patient Table Relationship:**

headfirst (F-10470, SRT)

**Patient Orientation:**

recumbent (F-10450, SRT)

Concept Modifier: Patient Orientation Modifier = supine (F-10340, SRT)

**Table Longitudinal Position:**

27.9000000000000 mm

**Table Lateral Position:**

1681.4 mm

**Table Head Tilt Angle:**

0 deg

**Table Cradle Tilt Angle:**

0 deg

**Target Region:**

Abdomen (T-D400, SRT)

**Number of Frames:**

22 1

**SubImages per Frame:**

1 1

**Wedges and Shutters****Bottom Shutter:**

144 mm

**Left Shutter:**

144 mm

**Right Shutter:**

144 mm

**Top Shutter:**

144 mm

**Beam Position**

**Longitudinal Beam Position:**

1156.000000000000 mm

**Beam Angle:**

0 deg

**Table Height Position:**

885 mm

## Irradiation Event X-Ray Data

Concept Modifier: Acquisition Plane = Single Plane (113622, DCM)

**DateTime Started:**

2014-03-13 16:20:39

**Irradiation Event Type:**

Fluoroscopy (P5-06000, SRT)

**Reference Point Definition:**

15cm below BeamIsocenter

**Irradiation Event UID:**

1.3.46.670589.28.961600801528.20140313162038810.1

**Dose Area Product:**

4.1861902169E-05 Gy.m2

**Dose (RP):**

0.00124655647382 Gy

**Positioner Primary Angle:**

-0.4 deg

**Positioner Secondary Angle:**

0.1 deg

### X-Ray Filters

**X-Ray Filter Type:**

Strip filter (113650, DCM)

**X-Ray Filter Material:**

Copper or Copper compound (C-127F9, SRT)

**X-Ray Filter Thickness Minimum:**

0.4 mm

**X-Ray Filter Thickness Maximum:**

0.4 mm

### X-Ray Filters

**X-Ray Filter Type:**

Strip filter (113650, DCM)

**X-Ray Filter Material:**

Aluminum or Aluminum compound (C-120F9, SRT)

**X-Ray Filter Thickness Minimum:**

1 mm

**X-Ray Filter Thickness Maximum:**

1 mm

**Fluoro Mode:**

Pulsed (113631, DCM)

**Pulse Rate:**

15 {pulse}/s

**Number of Pulses:**

111 1

**X-Ray Tube Current:**

43.7 mA

**Distance Source to Isocenter:**

810 mm

**KVP:**

110.19 kV

**Pulse Width:**

4 ms

**Irradiation Duration:**

7.399 s

**Patient Table Relationship:**

headfirst (F-10470, SRT)

**Patient Orientation:**

recumbent (F-10450, SRT)

Concept Modifier: Patient Orientation Modifier = supine (F-10340, SRT)

**Table Longitudinal Position:**

27.9000000000000 mm

**Table Lateral Position:**

1681.4 mm

**Table Head Tilt Angle:**

0 deg

**Table Cradle Tilt Angle:**

0 deg

**Target Region:**

Abdomen (T-D400, SRT)

**Number of Frames:**

111 1

**SubImages per Frame:**

1 1

**Wedges and Shutters****Bottom Shutter:**

136 mm

**Left Shutter:**

144 mm

**Right Shutter:**

144 mm

**Top Shutter:**

136 mm

**Beam Position**

**Longitudinal Beam Position:**

1156.000000000000 mm

**Beam Angle:**

0 deg

**Table Height Position:**

885 mm

## Irradiation Event X-Ray Data

Concept Modifier: Acquisition Plane = Single Plane (113622, DCM)

**DateTime Started:**

2014-03-13 16:20:48

**Irradiation Event Type:**

Fluoroscopy (P5-06000, SRT)

**Reference Point Definition:**

15cm below BeamIsocenter

**Irradiation Event UID:**

1.3.46.670589.28.961600801528.20140313162047935.1

**Dose Area Product:**

0.00011918567153 Gy.m2

**Dose (RP):**

0.00355831037649 Gy

**Positioner Primary Angle:**

-0.4 deg

**Positioner Secondary Angle:**

0.1 deg

### X-Ray Filters

**X-Ray Filter Type:**

Strip filter (113650, DCM)

**X-Ray Filter Material:**

Copper or Copper compound (C-127F9, SRT)

**X-Ray Filter Thickness Minimum:**

0.4 mm

**X-Ray Filter Thickness Maximum:**

0.4 mm

### X-Ray Filters

**X-Ray Filter Type:**

Strip filter (113650, DCM)

**X-Ray Filter Material:**

Aluminum or Aluminum compound (C-120F9, SRT)

**X-Ray Filter Thickness Minimum:**

1 mm

**X-Ray Filter Thickness Maximum:**

1 mm

**Fluoro Mode:**

Pulsed (113631, DCM)

**Pulse Rate:**

15 {pulse}/s

**Number of Pulses:**

315 1

**X-Ray Tube Current:**

43.8 mA

**Distance Source to Isocenter:**

810 mm

**KVP:**

109.87 kV

**Pulse Width:**

4 ms

**Irradiation Duration:**

20.999 s

**Patient Table Relationship:**

headfirst (F-10470, SRT)

**Patient Orientation:**

recumbent (F-10450, SRT)

Concept Modifier: Patient Orientation Modifier = supine (F-10340, SRT)

**Table Longitudinal Position:**

27.90000000000000 mm

**Table Lateral Position:**

1681.4 mm

**Table Head Tilt Angle:**

0 deg

**Table Cradle Tilt Angle:**

0 deg

**Target Region:**

Abdomen (T-D400, SRT)

**Number of Frames:**

315 1

**SubImages per Frame:**

1 1

**Wedges and Shutters****Bottom Shutter:**

136 mm

**Left Shutter:**

144 mm

**Right Shutter:**

144 mm

**Top Shutter:**

136 mm

**Beam Position**

**Longitudinal Beam Position:**

1156.000000000000 mm

**Beam Angle:**

0 deg

**Table Height Position:**

885 mm

## Irradiation Event X-Ray Data

Concept Modifier: Acquisition Plane = Single Plane (113622, DCM)

**DateTime Started:**

2014-03-13 16:21:11

**Irradiation Event Type:**

Fluoroscopy (P5-06000, SRT)

**Reference Point Definition:**

15cm below BeamIsocenter

**Irradiation Event UID:**

1.3.46.670589.28.961600801528.20140313162111122.1

**Dose Area Product:**

0.00012374067475 Gy.m2

**Dose (RP):**

0.00379706152433 Gy

**Positioner Primary Angle:**

-0.4 deg

**Positioner Secondary Angle:**

0.1 deg

### X-Ray Filters

**X-Ray Filter Type:**

Strip filter (113650, DCM)

**X-Ray Filter Material:**

Copper or Copper compound (C-127F9, SRT)

**X-Ray Filter Thickness Minimum:**

0.4 mm

**X-Ray Filter Thickness Maximum:**

0.4 mm

### X-Ray Filters

**X-Ray Filter Type:**

Strip filter (113650, DCM)

**X-Ray Filter Material:**

Aluminum or Aluminum compound (C-120F9, SRT)

**X-Ray Filter Thickness Minimum:**

1 mm

**X-Ray Filter Thickness Maximum:**

1 mm



**Fluoro Mode:**

Pulsed (113631, DCM)

**Pulse Rate:**

15 {pulse}/s

**Number of Pulses:**

328 1

**X-Ray Tube Current:**

43.7 mA

**Distance Source to Isocenter:**

810 mm

**KVP:**

110.08 kV

**Pulse Width:**

4 ms

**Irradiation Duration:**

21.866 s

**Patient Table Relationship:**

headfirst (F-10470, SRT)

**Patient Orientation:**

recumbent (F-10450, SRT)

Concept Modifier: Patient Orientation Modifier = supine (F-10340, SRT)

**Table Longitudinal Position:**

27.9000000000000 mm

**Table Lateral Position:**

1681.4 mm

**Table Head Tilt Angle:**

0 deg

**Table Cradle Tilt Angle:**

0 deg

**Target Region:**

Abdomen (T-D400, SRT)

**Number of Frames:**

328 1

**SubImages per Frame:**

1 1

**Wedges and Shutters****Bottom Shutter:**

136 mm

**Left Shutter:**

144 mm

**Right Shutter:**

144 mm

**Top Shutter:**

136 mm

**Beam Position**

**Longitudinal Beam Position:**

1156.000000000000 mm

**Beam Angle:**

0 deg

**Table Height Position:**

885 mm

## Irradiation Event X-Ray Data

Concept Modifier: Acquisition Plane = Single Plane (113622, DCM)

**DateTime Started:**

2014-03-13 16:21:35

**Irradiation Event Type:**

Fluoroscopy (P5-06000, SRT)

**Reference Point Definition:**

15cm below BeamIsocenter

**Irradiation Event UID:**

1.3.46.670589.28.961600801528.20140313162135075.1

**Dose Area Product:**

6.4035544750E-06 Gy.m2

**Dose (RP):**

0.00025711662075 Gy

**Positioner Primary Angle:**

-0.4 deg

**Positioner Secondary Angle:**

0.1 deg

### X-Ray Filters

**X-Ray Filter Type:**

Strip filter (113650, DCM)

**X-Ray Filter Material:**

Copper or Copper compound (C-127F9, SRT)

**X-Ray Filter Thickness Minimum:**

0.4 mm

**X-Ray Filter Thickness Maximum:**

0.4 mm

### X-Ray Filters

**X-Ray Filter Type:**

Strip filter (113650, DCM)

**X-Ray Filter Material:**

Aluminum or Aluminum compound (C-120F9, SRT)

**X-Ray Filter Thickness Minimum:**

1 mm

**X-Ray Filter Thickness Maximum:**

1 mm

**Fluoro Mode:**

Pulsed (113631, DCM)

**Pulse Rate:**

15 {pulse}/s

**Number of Pulses:**

22 1

**X-Ray Tube Current:**

42.7 mA

**Distance Source to Isocenter:**

810 mm

**KVP:**

112.59 kV

**Pulse Width:**

4 ms

**Irradiation Duration:**

1.466 s

**Patient Table Relationship:**

headfirst (F-10470, SRT)

**Patient Orientation:**

recumbent (F-10450, SRT)

Concept Modifier: Patient Orientation Modifier = supine (F-10340, SRT)

**Table Longitudinal Position:**

27.9000000000000 mm

**Table Lateral Position:**

1681.4 mm

**Table Head Tilt Angle:**

0 deg

**Table Cradle Tilt Angle:**

0 deg

**Target Region:**

Abdomen (T-D400, SRT)

**Number of Frames:**

22 1

**SubImages per Frame:**

1 1

**Wedges and Shutters****Bottom Shutter:**

114 mm

**Left Shutter:**

144 mm

**Right Shutter:**

144 mm

**Top Shutter:**

114 mm

**Beam Position**

**Longitudinal Beam Position:**

1156.000000000000 mm

**Beam Angle:**

0 deg

**Table Height Position:**

885 mm

## Irradiation Event X-Ray Data

Concept Modifier: Acquisition Plane = Single Plane (113622, DCM)

**DateTime Started:**

2014-03-13 16:21:40

**Irradiation Event Type:**

Fluoroscopy (P5-06000, SRT)

**Reference Point Definition:**

15cm below BeamIsocenter

**Irradiation Event UID:**

1.3.46.670589.28.961600801528.20140313162139997.1

**Dose Area Product:**

0.00013296340323 Gy.m2

**Dose (RP):**

0.00468549127640 Gy

**Positioner Primary Angle:**

-0.4 deg

**Positioner Secondary Angle:**

0.1 deg

### X-Ray Filters

**X-Ray Filter Type:**

Strip filter (113650, DCM)

**X-Ray Filter Material:**

Copper or Copper compound (C-127F9, SRT)

**X-Ray Filter Thickness Minimum:**

0.4 mm

**X-Ray Filter Thickness Maximum:**

0.4 mm

### X-Ray Filters

**X-Ray Filter Type:**

Strip filter (113650, DCM)

**X-Ray Filter Material:**

Aluminum or Aluminum compound (C-120F9, SRT)

**X-Ray Filter Thickness Minimum:**

1 mm

**X-Ray Filter Thickness Maximum:**

1 mm

**Fluoro Mode:**

Pulsed (113631, DCM)

**Pulse Rate:**

15 {pulse}/s

**Number of Pulses:**

229 1

**X-Ray Tube Current:**

125.9 mA

**Distance Source to Isocenter:**

810 mm

**KVP:**

95.31 kV

**Pulse Width:**

4 ms

**Irradiation Duration:**

15.266 s

**Patient Table Relationship:**

headfirst (F-10470, SRT)

**Patient Orientation:**

recumbent (F-10450, SRT)

Concept Modifier: Patient Orientation Modifier = supine (F-10340, SRT)

**Table Longitudinal Position:**

27.9000000000000 mm

**Table Lateral Position:**

1681.4 mm

**Table Head Tilt Angle:**

0 deg

**Table Cradle Tilt Angle:**

0 deg

**Target Region:**

Abdomen (T-D400, SRT)

**Number of Frames:**

229 1

**SubImages per Frame:**

1 1

**Wedges and Shutters****Bottom Shutter:**

114 mm

**Left Shutter:**

144 mm

**Right Shutter:**

144 mm

**Top Shutter:**

114 mm

**Beam Position**

**Longitudinal Beam Position:**

1156.000000000000 mm

**Beam Angle:**

0 deg

**Table Height Position:**

885 mm

## Irradiation Event X-Ray Data

Concept Modifier: Acquisition Plane = Single Plane (113622, DCM)

**DateTime Started:**

2014-03-13 16:21:57

**Irradiation Event Type:**

Fluoroscopy (P5-06000, SRT)

**Reference Point Definition:**

15cm below BeamIsocenter

**Irradiation Event UID:**

1.3.46.670589.28.961600801528.20140313162157200.1

**Dose Area Product:**

8.0887786538E-05 Gy.m2

**Dose (RP):**

0.00283746556473 Gy

**Positioner Primary Angle:**

-0.4 deg

**Positioner Secondary Angle:**

0.1 deg

### X-Ray Filters

**X-Ray Filter Type:**

Strip filter (113650, DCM)

**X-Ray Filter Material:**

Copper or Copper compound (C-127F9, SRT)

**X-Ray Filter Thickness Minimum:**

0.4 mm

**X-Ray Filter Thickness Maximum:**

0.4 mm

### X-Ray Filters

**X-Ray Filter Type:**

Strip filter (113650, DCM)

**X-Ray Filter Material:**

Aluminum or Aluminum compound (C-120F9, SRT)

**X-Ray Filter Thickness Minimum:**

1 mm

**X-Ray Filter Thickness Maximum:**

1 mm

**Fluoro Mode:**

Pulsed (113631, DCM)

**Pulse Rate:**

15 {pulse}/s

**Number of Pulses:**

137 1

**X-Ray Tube Current:**

125.4 mA

**Distance Source to Isocenter:**

810 mm

**KVP:**

95.71 kV

**Pulse Width:**

4 ms

**Irradiation Duration:**

9.133 s

**Patient Table Relationship:**

headfirst (F-10470, SRT)

**Patient Orientation:**

recumbent (F-10450, SRT)

Concept Modifier: Patient Orientation Modifier = supine (F-10340, SRT)

**Table Longitudinal Position:**

27.9000000000000 mm

**Table Lateral Position:**

1681.4 mm

**Table Head Tilt Angle:**

0 deg

**Table Cradle Tilt Angle:**

0 deg

**Target Region:**

Abdomen (T-D400, SRT)

**Number of Frames:**

137 1

**SubImages per Frame:**

1 1

**Wedges and Shutters****Bottom Shutter:**

114 mm

**Left Shutter:**

144 mm

**Right Shutter:**

144 mm

**Top Shutter:**

114 mm

**Beam Position**

**Longitudinal Beam Position:**

1156.000000000000 mm

**Beam Angle:**

0 deg

**Table Height Position:**

885 mm

## Irradiation Event X-Ray Data

Concept Modifier: Acquisition Plane = Single Plane (113622, DCM)

**DateTime Started:**

2014-03-13 16:22:20

**Irradiation Event Type:**

Fluoroscopy (P5-06000, SRT)

**Reference Point Definition:**

15cm below BeamIsocenter

**Irradiation Event UID:**

1.3.46.670589.28.961600801528.20140313162219638.1

**Dose Area Product:**

7.0837758482E-06 Gy.m2

**Dose (RP):**

0.00024334251606 Gy

**Positioner Primary Angle:**

-0.4 deg

**Positioner Secondary Angle:**

0.1 deg

### X-Ray Filters

**X-Ray Filter Type:**

Strip filter (113650, DCM)

**X-Ray Filter Material:**

Copper or Copper compound (C-127F9, SRT)

**X-Ray Filter Thickness Minimum:**

0.4 mm

**X-Ray Filter Thickness Maximum:**

0.4 mm

### X-Ray Filters

**X-Ray Filter Type:**

Strip filter (113650, DCM)

**X-Ray Filter Material:**

Aluminum or Aluminum compound (C-120F9, SRT)

**X-Ray Filter Thickness Minimum:**

1 mm

**X-Ray Filter Thickness Maximum:**

1 mm



**Fluoro Mode:**

Pulsed (113631, DCM)

**Pulse Rate:**

15 {pulse}/s

**Number of Pulses:**

12 1

**X-Ray Tube Current:**

125.2 mA

**Distance Source to Isocenter:**

810 mm

**KVP:**

95.89 kV

**Pulse Width:**

4 ms

**Irradiation Duration:**

0.7989999999999999 s

**Patient Table Relationship:**

headfirst (F-10470, SRT)

**Patient Orientation:**

recumbent (F-10450, SRT)

Concept Modifier: Patient Orientation Modifier = supine (F-10340, SRT)

**Table Longitudinal Position:**

27.90000000000000 mm

**Table Lateral Position:**

1681.4 mm

**Table Head Tilt Angle:**

0 deg

**Table Cradle Tilt Angle:**

0 deg

**Target Region:**

Abdomen (T-D400, SRT)

**Number of Frames:**

12 1

**SubImages per Frame:**

1 1

**Wedges and Shutters****Bottom Shutter:**

114 mm

**Left Shutter:**

144 mm

**Right Shutter:**

144 mm

**Top Shutter:**

114 mm

**Beam Position**

**Longitudinal Beam Position:**

1156.000000000000 mm

**Beam Angle:**

0 deg

**Table Height Position:**

885 mm

## Irradiation Event X-Ray Data

Concept Modifier: Acquisition Plane = Single Plane (113622, DCM)

**DateTime Started:**

2014-03-13 16:22:31

**Irradiation Event Type:**

Fluoroscopy (P5-06000, SRT)

**Reference Point Definition:**

15cm below BeamIsocenter

**Irradiation Event UID:**

1.3.46.670589.28.961600801528.20140313162230747.1

**Dose Area Product:**

3.2725774826E-05 Gy.m2

**Dose (RP):**

0.00124196510560 Gy

**Positioner Primary Angle:**

-0.4 deg

**Positioner Secondary Angle:**

0.1 deg

### X-Ray Filters

**X-Ray Filter Type:**

Strip filter (113650, DCM)

**X-Ray Filter Material:**

Copper or Copper compound (C-127F9, SRT)

**X-Ray Filter Thickness Minimum:**

0.4 mm

**X-Ray Filter Thickness Maximum:**

0.4 mm

### X-Ray Filters

**X-Ray Filter Type:**

Strip filter (113650, DCM)

**X-Ray Filter Material:**

Aluminum or Aluminum compound (C-120F9, SRT)

**X-Ray Filter Thickness Minimum:**

1 mm

**X-Ray Filter Thickness Maximum:**

1 mm

**Fluoro Mode:**

Pulsed (113631, DCM)

**Pulse Rate:**

15 {pulse}/s

**Number of Pulses:**

61 1

**X-Ray Tube Current:**

124.8 mA

**Distance Source to Isocenter:**

810 mm

**KVP:**

96.21 kV

**Pulse Width:**

4 ms

**Irradiation Duration:**

4.066 s

**Patient Table Relationship:**

headfirst (F-10470, SRT)

**Patient Orientation:**

recumbent (F-10450, SRT)

Concept Modifier: Patient Orientation Modifier = supine (F-10340, SRT)

**Table Longitudinal Position:**

27.9000000000000 mm

**Table Lateral Position:**

1681.4 mm

**Table Head Tilt Angle:**

0 deg

**Table Cradle Tilt Angle:**

0 deg

**Target Region:**

Abdomen (T-D400, SRT)

**Number of Frames:**

61 1

**SubImages per Frame:**

1 1

**Wedges and Shutters****Bottom Shutter:**

114 mm

**Left Shutter:**

144 mm

**Right Shutter:**

144 mm

**Top Shutter:**

114 mm

**Beam Position**

**Longitudinal Beam Position:**

1156.000000000000 mm

**Beam Angle:**

0 deg

**Table Height Position:**

885 mm

## Irradiation Event X-Ray Data

Concept Modifier: Acquisition Plane = Single Plane (113622, DCM)

**DateTime Started:**

2014-03-13 16:22:37

**Irradiation Event Type:**

Fluoroscopy (P5-06000, SRT)

**Reference Point Definition:**

15cm below BeamIsocenter

**Irradiation Event UID:**

1.3.46.670589.28.961600801528.20140313162236653.1

**Dose Area Product:**

5.8793077481E-05 Gy.m2

**Dose (RP):**

0.00200642791551 Gy

**Positioner Primary Angle:**

-0.4 deg

**Positioner Secondary Angle:**

0.1 deg

### X-Ray Filters

**X-Ray Filter Type:**

Strip filter (113650, DCM)

**X-Ray Filter Material:**

Copper or Copper compound (C-127F9, SRT)

**X-Ray Filter Thickness Minimum:**

0.4 mm

**X-Ray Filter Thickness Maximum:**

0.4 mm

### X-Ray Filters

**X-Ray Filter Type:**

Strip filter (113650, DCM)

**X-Ray Filter Material:**

Aluminum or Aluminum compound (C-120F9, SRT)

**X-Ray Filter Thickness Minimum:**

1 mm

**X-Ray Filter Thickness Maximum:**

1 mm

**Fluoro Mode:**

Pulsed (113631, DCM)

**Pulse Rate:**

15 {pulse}/s

**Number of Pulses:**

98 1

**X-Ray Tube Current:**

124.6 mA

**Distance Source to Isocenter:**

810 mm

**KVP:**

96.3 kV

**Pulse Width:**

4 ms

**Irradiation Duration:**

6.533 s

**Patient Table Relationship:**

headfirst (F-10470, SRT)

**Patient Orientation:**

recumbent (F-10450, SRT)

Concept Modifier: Patient Orientation Modifier = supine (F-10340, SRT)

**Table Longitudinal Position:**

27.9000000000000 mm

**Table Lateral Position:**

1681.4 mm

**Table Head Tilt Angle:**

0 deg

**Table Cradle Tilt Angle:**

0 deg

**Target Region:**

Abdomen (T-D400, SRT)

**Number of Frames:**

98 1

**SubImages per Frame:**

1 1

**Wedges and Shutters****Bottom Shutter:**

114 mm

**Left Shutter:**

144 mm

**Right Shutter:**

144 mm

**Top Shutter:**

114 mm

**Beam Position**

**Longitudinal Beam Position:**

1156.000000000000 mm

**Beam Angle:**

0 deg

**Table Height Position:**

885 mm

## Irradiation Event X-Ray Data

Concept Modifier: Acquisition Plane = Single Plane (113622, DCM)

**DateTime Started:**

2014-03-13 16:23:10

**Irradiation Event Type:**

Fluoroscopy (P5-06000, SRT)

**Reference Point Definition:**

15cm below BeamIsocenter

**Irradiation Event UID:**

1.3.46.670589.28.961600801528.20140313162309856.1

**Dose Area Product:**

0.00021231755132 Gy.m2

**Dose (RP):**

0.00736455463728 Gy

**Positioner Primary Angle:**

-0.4 deg

**Positioner Secondary Angle:**

0.1 deg

### X-Ray Filters

**X-Ray Filter Type:**

Strip filter (113650, DCM)

**X-Ray Filter Material:**

Copper or Copper compound (C-127F9, SRT)

**X-Ray Filter Thickness Minimum:**

0.4 mm

**X-Ray Filter Thickness Maximum:**

0.4 mm

### X-Ray Filters

**X-Ray Filter Type:**

Strip filter (113650, DCM)

**X-Ray Filter Material:**

Aluminum or Aluminum compound (C-120F9, SRT)

**X-Ray Filter Thickness Minimum:**

1 mm

**X-Ray Filter Thickness Maximum:**

1 mm

**Fluoro Mode:**

Pulsed (113631, DCM)

**Pulse Rate:**

15 {pulse}/s

**Number of Pulses:**

357 1

**X-Ray Tube Current:**

125.2 mA

**Distance Source to Isocenter:**

810 mm

**KVP:**

95.89 kV

**Pulse Width:**

4 ms

**Irradiation Duration:**

23.799 s

**Patient Table Relationship:**

headfirst (F-10470, SRT)

**Patient Orientation:**

recumbent (F-10450, SRT)

Concept Modifier: Patient Orientation Modifier = supine (F-10340, SRT)

**Table Longitudinal Position:**

27.9000000000000 mm

**Table Lateral Position:**

1681.4 mm

**Table Head Tilt Angle:**

0 deg

**Table Cradle Tilt Angle:**

0 deg

**Target Region:**

Abdomen (T-D400, SRT)

**Number of Frames:**

357 1

**SubImages per Frame:**

1 1

**Wedges and Shutters****Bottom Shutter:**

114 mm

**Left Shutter:**

144 mm

**Right Shutter:**

144 mm

**Top Shutter:**

114 mm

**Beam Position**

**Longitudinal Beam Position:**

1156.000000000000 mm

**Beam Angle:**

0 deg

**Table Height Position:**

885 mm

## Irradiation Event X-Ray Data

Concept Modifier: Acquisition Plane = Single Plane (113622, DCM)

**DateTime Started:**

2014-03-13 16:23:36

**Irradiation Event Type:**

Fluoroscopy (P5-06000, SRT)

**Reference Point Definition:**

15cm below BeamIsocenter

**Irradiation Event UID:**

1.3.46.670589.28.961600801528.20140313162336388.1

**Dose Area Product:**

1.3751393197E-05 Gy.m2

**Dose (RP):**

0.00046602387511 Gy

**Positioner Primary Angle:**

-0.4 deg

**Positioner Secondary Angle:**

0.1 deg

### X-Ray Filters

**X-Ray Filter Type:**

Strip filter (113650, DCM)

**X-Ray Filter Material:**

Copper or Copper compound (C-127F9, SRT)

**X-Ray Filter Thickness Minimum:**

0.4 mm

**X-Ray Filter Thickness Maximum:**

0.4 mm

### X-Ray Filters

**X-Ray Filter Type:**

Strip filter (113650, DCM)

**X-Ray Filter Material:**

Aluminum or Aluminum compound (C-120F9, SRT)

**X-Ray Filter Thickness Minimum:**

1 mm

**X-Ray Filter Thickness Maximum:**

1 mm



**Fluoro Mode:**

Pulsed (113631, DCM)

**Pulse Rate:**

15 {pulse}/s

**Number of Pulses:**

23 1

**X-Ray Tube Current:**

124.8 mA

**Distance Source to Isocenter:**

810 mm

**KVP:**

96.16 kV

**Pulse Width:**

4 ms

**Irradiation Duration:**

1.533 s

**Patient Table Relationship:**

headfirst (F-10470, SRT)

**Patient Orientation:**

recumbent (F-10450, SRT)

Concept Modifier: Patient Orientation Modifier = supine (F-10340, SRT)

**Table Longitudinal Position:**

27.9000000000000 mm

**Table Lateral Position:**

1681.4 mm

**Table Head Tilt Angle:**

0 deg

**Table Cradle Tilt Angle:**

0 deg

**Target Region:**

Abdomen (T-D400, SRT)

**Number of Frames:**

23 1

**SubImages per Frame:**

1 1

**Wedges and Shutters****Bottom Shutter:**

114 mm

**Left Shutter:**

144 mm

**Right Shutter:**

144 mm

**Top Shutter:**

114 mm

**Beam Position**

**Longitudinal Beam Position:**

1156.000000000000 mm

**Beam Angle:**

0 deg

**Table Height Position:**

885 mm

## Irradiation Event X-Ray Data

Concept Modifier: Acquisition Plane = Single Plane (113622, DCM)

**DateTime Started:**

2014-03-13 16:23:41

**Irradiation Event Type:**

Fluoroscopy (P5-06000, SRT)

**Reference Point Definition:**

15cm below BeamIsocenter

**Irradiation Event UID:**

1.3.46.670589.28.961600801528.20140313162340606.1

**Dose Area Product:**

0.00014681316901 Gy.m2

**Dose (RP):**

0.00508953168044 Gy

**Positioner Primary Angle:**

-0.4 deg

**Positioner Secondary Angle:**

0.1 deg

### X-Ray Filters

**X-Ray Filter Type:**

Strip filter (113650, DCM)

**X-Ray Filter Material:**

Copper or Copper compound (C-127F9, SRT)

**X-Ray Filter Thickness Minimum:**

0.4 mm

**X-Ray Filter Thickness Maximum:**

0.4 mm

### X-Ray Filters

**X-Ray Filter Type:**

Strip filter (113650, DCM)

**X-Ray Filter Material:**

Aluminum or Aluminum compound (C-120F9, SRT)

**X-Ray Filter Thickness Minimum:**

1 mm

**X-Ray Filter Thickness Maximum:**

1 mm

**Fluoro Mode:**

Pulsed (113631, DCM)

**Pulse Rate:**

15 {pulse}/s

**Number of Pulses:**

248 1

**X-Ray Tube Current:**

125.4 mA

**Distance Source to Isocenter:**

810 mm

**KVP:**

95.76 kV

**Pulse Width:**

4 ms

**Irradiation Duration:**

16.533 s

**Patient Table Relationship:**

headfirst (F-10470, SRT)

**Patient Orientation:**

recumbent (F-10450, SRT)

Concept Modifier: Patient Orientation Modifier = supine (F-10340, SRT)

**Table Longitudinal Position:**

27.9000000000000 mm

**Table Lateral Position:**

1681.4 mm

**Table Head Tilt Angle:**

0 deg

**Table Cradle Tilt Angle:**

0 deg

**Target Region:**

Abdomen (T-D400, SRT)

**Number of Frames:**

248 1

**SubImages per Frame:**

1 1

**Wedges and Shutters****Bottom Shutter:**

114 mm

**Left Shutter:**

144 mm

**Right Shutter:**

144 mm

**Top Shutter:**

114 mm

**Beam Position**

**Longitudinal Beam Position:**

1156.000000000000 mm

**Beam Angle:**

0 deg

**Table Height Position:**

885 mm

## Irradiation Event X-Ray Data

Concept Modifier: Acquisition Plane = Single Plane (113622, DCM)

**DateTime Started:**

2014-03-13 16:24:00

**Irradiation Event Type:**

Fluoroscopy (P5-06000, SRT)

**Reference Point Definition:**

15cm below BeamIsocenter

**Irradiation Event UID:**

1.3.46.670589.28.961600801528.20140313162359841.1

**Dose Area Product:**

1.6108657009E-05 Gy.m2

**Dose (RP):**

0.00055325987144 Gy

**Positioner Primary Angle:**

-0.4 deg

**Positioner Secondary Angle:**

0.1 deg

### X-Ray Filters

**X-Ray Filter Type:**

Strip filter (113650, DCM)

**X-Ray Filter Material:**

Copper or Copper compound (C-127F9, SRT)

**X-Ray Filter Thickness Minimum:**

0.4 mm

**X-Ray Filter Thickness Maximum:**

0.4 mm

### X-Ray Filters

**X-Ray Filter Type:**

Strip filter (113650, DCM)

**X-Ray Filter Material:**

Aluminum or Aluminum compound (C-120F9, SRT)

**X-Ray Filter Thickness Minimum:**

1 mm

**X-Ray Filter Thickness Maximum:**

1 mm

**Fluoro Mode:**

Pulsed (113631, DCM)

**Pulse Rate:**

15 {pulse}/s

**Number of Pulses:**

27 1

**X-Ray Tube Current:**

124.8 mA

**Distance Source to Isocenter:**

810 mm

**KVP:**

96.21 kV

**Pulse Width:**

4 ms

**Irradiation Duration:**

1.799 s

**Patient Table Relationship:**

headfirst (F-10470, SRT)

**Patient Orientation:**

recumbent (F-10450, SRT)

Concept Modifier: Patient Orientation Modifier = supine (F-10340, SRT)

**Table Longitudinal Position:**

27.9000000000000 mm

**Table Lateral Position:**

1681.4 mm

**Table Head Tilt Angle:**

0 deg

**Table Cradle Tilt Angle:**

0 deg

**Target Region:**

Abdomen (T-D400, SRT)

**Number of Frames:**

27 1

**SubImages per Frame:**

1 1

**Wedges and Shutters****Bottom Shutter:**

114 mm

**Left Shutter:**

144 mm

**Right Shutter:**

144 mm

**Top Shutter:**

114 mm

**Beam Position**

**Longitudinal Beam Position:**

1156.000000000000 mm

**Beam Angle:**

0 deg

**Table Height Position:**

885 mm

## Irradiation Event X-Ray Data

Concept Modifier: Acquisition Plane = Single Plane (113622, DCM)

**DateTime Started:**

2014-03-13 16:24:04

**Irradiation Event Type:**

Fluoroscopy (P5-06000, SRT)

**Reference Point Definition:**

15cm below BeamIsocenter

**Irradiation Event UID:**

1.3.46.670589.28.961600801528.20140313162403919.1

**Dose Area Product:**

0.00027519331959 Gy.m2

**Dose (RP):**

0.00952479338842 Gy

**Positioner Primary Angle:**

-0.4 deg

**Positioner Secondary Angle:**

0.1 deg

### X-Ray Filters

**X-Ray Filter Type:**

Strip filter (113650, DCM)

**X-Ray Filter Material:**

Copper or Copper compound (C-127F9, SRT)

**X-Ray Filter Thickness Minimum:**

0.4 mm

**X-Ray Filter Thickness Maximum:**

0.4 mm

### X-Ray Filters

**X-Ray Filter Type:**

Strip filter (113650, DCM)

**X-Ray Filter Material:**

Aluminum or Aluminum compound (C-120F9, SRT)

**X-Ray Filter Thickness Minimum:**

1 mm

**X-Ray Filter Thickness Maximum:**

1 mm

**Fluoro Mode:**

Pulsed (113631, DCM)

**Pulse Rate:**

15 {pulse}/s

**Number of Pulses:**

467 1

**X-Ray Tube Current:**

125.6 mA

**Distance Source to Isocenter:**

810 mm

**KVP:**

95.58 kV

**Pulse Width:**

4 ms

**Irradiation Duration:**

31.133 s

**Patient Table Relationship:**

headfirst (F-10470, SRT)

**Patient Orientation:**

recumbent (F-10450, SRT)

Concept Modifier: Patient Orientation Modifier = supine (F-10340, SRT)

**Table Longitudinal Position:**

27.9000000000000 mm

**Table Lateral Position:**

1681.4 mm

**Table Head Tilt Angle:**

0 deg

**Table Cradle Tilt Angle:**

0 deg

**Target Region:**

Abdomen (T-D400, SRT)

**Number of Frames:**

467 1

**SubImages per Frame:**

1 1

**Wedges and Shutters****Bottom Shutter:**

114 mm

**Left Shutter:**

144 mm

**Right Shutter:**

144 mm

**Top Shutter:**

114 mm

**Beam Position**

**Longitudinal Beam Position:**

1156.000000000000 mm

**Beam Angle:**

0 deg

**Table Height Position:**

885 mm

## Irradiation Event X-Ray Data

Concept Modifier: Acquisition Plane = Single Plane (113622, DCM)

**DateTime Started:**

2014-03-13 16:24:37

**Irradiation Event Type:**

Fluoroscopy (P5-06000, SRT)

**Reference Point Definition:**

15cm below BeamIsocenter

**Irradiation Event UID:**

1.3.46.670589.28.961600801528.20140313162437013.1

**Dose Area Product:**

2.0278269164E-05 Gy.m2

**Dose (RP):**

0.00068640955004 Gy

**Positioner Primary Angle:**

-0.4 deg

**Positioner Secondary Angle:**

0.1 deg

### X-Ray Filters

**X-Ray Filter Type:**

Strip filter (113650, DCM)

**X-Ray Filter Material:**

Copper or Copper compound (C-127F9, SRT)

**X-Ray Filter Thickness Minimum:**

0.4 mm

**X-Ray Filter Thickness Maximum:**

0.4 mm

### X-Ray Filters

**X-Ray Filter Type:**

Strip filter (113650, DCM)

**X-Ray Filter Material:**

Aluminum or Aluminum compound (C-120F9, SRT)

**X-Ray Filter Thickness Minimum:**

1 mm

**X-Ray Filter Thickness Maximum:**

1 mm



**Fluoro Mode:**

Pulsed (113631, DCM)

**Pulse Rate:**

15 {pulse}/s

**Number of Pulses:**

34 1

**X-Ray Tube Current:**

125.1 mA

**Distance Source to Isocenter:**

810 mm

**KVP:**

95.94 kV

**Pulse Width:**

4 ms

**Irradiation Duration:**

2.266 s

**Patient Table Relationship:**

headfirst (F-10470, SRT)

**Patient Orientation:**

recumbent (F-10450, SRT)

Concept Modifier: Patient Orientation Modifier = supine (F-10340, SRT)

**Table Longitudinal Position:**

27.9000000000000 mm

**Table Lateral Position:**

1681.4 mm

**Table Head Tilt Angle:**

0 deg

**Table Cradle Tilt Angle:**

0 deg

**Target Region:**

Abdomen (T-D400, SRT)

**Number of Frames:**

34 1

**SubImages per Frame:**

1 1

**Wedges and Shutters****Bottom Shutter:**

114 mm

**Left Shutter:**

144 mm

**Right Shutter:**

144 mm

**Top Shutter:**

114 mm

**Beam Position**

**Longitudinal Beam Position:**

1156.000000000000 mm

**Beam Angle:**

0 deg

**Table Height Position:**

885 mm

## Irradiation Event X-Ray Data

Concept Modifier: Acquisition Plane = Single Plane (113622, DCM)

**DateTime Started:**

2014-03-13 16:24:41

**Irradiation Event Type:**

Fluoroscopy (P5-06000, SRT)

**Reference Point Definition:**

15cm below BeamIsocenter

**Irradiation Event UID:**

1.3.46.670589.28.961600801528.20140313162441153.1

**Dose Area Product:**

0.00013882194079 Gy.m2

**Dose (RP):**

0.00484848484848 Gy

**Positioner Primary Angle:**

-0.4 deg

**Positioner Secondary Angle:**

0.1 deg

### X-Ray Filters

**X-Ray Filter Type:**

Strip filter (113650, DCM)

**X-Ray Filter Material:**

Copper or Copper compound (C-127F9, SRT)

**X-Ray Filter Thickness Minimum:**

0.4 mm

**X-Ray Filter Thickness Maximum:**

0.4 mm

### X-Ray Filters

**X-Ray Filter Type:**

Strip filter (113650, DCM)

**X-Ray Filter Material:**

Aluminum or Aluminum compound (C-120F9, SRT)

**X-Ray Filter Thickness Minimum:**

1 mm

**X-Ray Filter Thickness Maximum:**

1 mm

**Fluoro Mode:**

Pulsed (113631, DCM)

**Pulse Rate:**

15 {pulse}/s

**Number of Pulses:**

236 1

**X-Ray Tube Current:**

125.7 mA

**Distance Source to Isocenter:**

810 mm

**KVP:**

95.49 kV

**Pulse Width:**

4 ms

**Irradiation Duration:**

15.733 s

**Patient Table Relationship:**

headfirst (F-10470, SRT)

**Patient Orientation:**

recumbent (F-10450, SRT)

Concept Modifier: Patient Orientation Modifier = supine (F-10340, SRT)

**Table Longitudinal Position:**

27.9000000000000 mm

**Table Lateral Position:**

1681.4 mm

**Table Head Tilt Angle:**

0 deg

**Table Cradle Tilt Angle:**

0 deg

**Target Region:**

Abdomen (T-D400, SRT)

**Number of Frames:**

236 1

**SubImages per Frame:**

1 1

**Wedges and Shutters****Bottom Shutter:**

114 mm

**Left Shutter:**

144 mm

**Right Shutter:**

144 mm

**Top Shutter:**

114 mm

**Beam Position**

**Longitudinal Beam Position:**

1156.000000000000 mm

**Beam Angle:**

0 deg

**Table Height Position:**

885 mm

## Irradiation Event X-Ray Data

Concept Modifier: Acquisition Plane = Single Plane (113622, DCM)

**DateTime Started:**

2014-03-13 16:29:12

**Irradiation Event Type:**

Fluoroscopy (P5-06000, SRT)

**Reference Point Definition:**

15cm below BeamIsocenter

**Irradiation Event UID:**

1.3.46.670589.28.961600801528.20140313162911434.1

**Dose Area Product:**

0.00011638562883 Gy.m2

**Dose (RP):**

0.00472910927456 Gy

**Positioner Primary Angle:**

-0.4 deg

**Positioner Secondary Angle:**

0.1 deg

### X-Ray Filters

**X-Ray Filter Type:**

Strip filter (113650, DCM)

**X-Ray Filter Material:**

Copper or Copper compound (C-127F9, SRT)

**X-Ray Filter Thickness Minimum:**

0.4 mm

**X-Ray Filter Thickness Maximum:**

0.4 mm

### X-Ray Filters

**X-Ray Filter Type:**

Strip filter (113650, DCM)

**X-Ray Filter Material:**

Aluminum or Aluminum compound (C-120F9, SRT)

**X-Ray Filter Thickness Minimum:**

1 mm

**X-Ray Filter Thickness Maximum:**

1 mm

**Fluoro Mode:**

Pulsed (113631, DCM)

**Pulse Rate:**

15 {pulse}/s

**Number of Pulses:**

228 1

**X-Ray Tube Current:**

122.8 mA

**Distance Source to Isocenter:**

810 mm

**KVP:**

97.76 kV

**Pulse Width:**

4 ms

**Irradiation Duration:**

15.199 s

**Patient Table Relationship:**

headfirst (F-10470, SRT)

**Patient Orientation:**

recumbent (F-10450, SRT)

Concept Modifier: Patient Orientation Modifier = supine (F-10340, SRT)

**Table Longitudinal Position:**

27.9000000000000 mm

**Table Lateral Position:**

1681.4 mm

**Table Head Tilt Angle:**

0 deg

**Table Cradle Tilt Angle:**

0 deg

**Target Region:**

Abdomen (T-D400, SRT)

**Number of Frames:**

228 1

**SubImages per Frame:**

1 1

**Wedges and Shutters****Bottom Shutter:**

100 mm

**Left Shutter:**

118 mm

**Right Shutter:**

118 mm

**Top Shutter:**

100 mm

**Beam Position**

**Longitudinal Beam Position:**

1156.000000000000 mm

**Beam Angle:**

0 deg

**Table Height Position:**

885 mm

## Irradiation Event X-Ray Data

Concept Modifier: Acquisition Plane = Single Plane (113622, DCM)

**DateTime Started:**

2014-03-13 16:29:28

**Irradiation Event Type:**

Fluoroscopy (P5-06000, SRT)

**Reference Point Definition:**

15cm below BeamIsocenter

**Irradiation Event UID:**

1.3.46.670589.28.961600801528.20140313162928325.1

**Dose Area Product:**

6.4967454364E-06 Gy.m2

**Dose (RP):**

0.00029384756657 Gy

**Positioner Primary Angle:**

-0.4 deg

**Positioner Secondary Angle:**

0.1 deg

### X-Ray Filters

**X-Ray Filter Type:**

Strip filter (113650, DCM)

**X-Ray Filter Material:**

Copper or Copper compound (C-127F9, SRT)

**X-Ray Filter Thickness Minimum:**

0.4 mm

**X-Ray Filter Thickness Maximum:**

0.4 mm

### X-Ray Filters

**X-Ray Filter Type:**

Strip filter (113650, DCM)

**X-Ray Filter Material:**

Aluminum or Aluminum compound (C-120F9, SRT)

**X-Ray Filter Thickness Minimum:**

1 mm

**X-Ray Filter Thickness Maximum:**

1 mm

**Fluoro Mode:**

Pulsed (113631, DCM)

**Pulse Rate:**

15 {pulse}/s

**Number of Pulses:**

14 1

**X-Ray Tube Current:**

120.7 mA

**Distance Source to Isocenter:**

810 mm

**KVP:**

99.45 kV

**Pulse Width:**

4 ms

**Irradiation Duration:**

0.933 s

**Patient Table Relationship:**

headfirst (F-10470, SRT)

**Patient Orientation:**

recumbent (F-10450, SRT)

Concept Modifier: Patient Orientation Modifier = supine (F-10340, SRT)

**Table Longitudinal Position:**

27.9000000000000 mm

**Table Lateral Position:**

1681.4 mm

**Table Head Tilt Angle:**

0 deg

**Table Cradle Tilt Angle:**

0 deg

**Target Region:**

Abdomen (T-D400, SRT)

**Number of Frames:**

14 1

**SubImages per Frame:**

1 1

**Wedges and Shutters****Bottom Shutter:**

100 mm

**Left Shutter:**

118 mm

**Right Shutter:**

118 mm

**Top Shutter:**

100 mm

**Beam Position**

**Longitudinal Beam Position:**

1156.000000000000 mm

**Beam Angle:**

0 deg

**Table Height Position:**

885 mm

## Irradiation Event X-Ray Data

Concept Modifier: Acquisition Plane = Single Plane (113622, DCM)

**DateTime Started:**

2014-03-13 16:29:31

**Irradiation Event Type:**

Fluoroscopy (P5-06000, SRT)

**Reference Point Definition:**

15cm below BeamIsocenter

**Irradiation Event UID:**

1.3.46.670589.28.961600801528.20140313162930638.1

**Dose Area Product:**

6.7998959120E-05 Gy.m2

**Dose (RP):**

0.00327594123048 Gy

**Positioner Primary Angle:**

-0.4 deg

**Positioner Secondary Angle:**

0.1 deg

### X-Ray Filters

**X-Ray Filter Type:**

Strip filter (113650, DCM)

**X-Ray Filter Material:**

Copper or Copper compound (C-127F9, SRT)

**X-Ray Filter Thickness Minimum:**

0.4 mm

**X-Ray Filter Thickness Maximum:**

0.4 mm

### X-Ray Filters

**X-Ray Filter Type:**

Strip filter (113650, DCM)

**X-Ray Filter Material:**

Aluminum or Aluminum compound (C-120F9, SRT)

**X-Ray Filter Thickness Minimum:**

1 mm

**X-Ray Filter Thickness Maximum:**

1 mm



**Fluoro Mode:**

Pulsed (113631, DCM)

**Pulse Rate:**

15 {pulse}/s

**Number of Pulses:**

150 1

**X-Ray Tube Current:**

122.3 mA

**Distance Source to Isocenter:**

810 mm

**KVP:**

98.18 kV

**Pulse Width:**

4 ms

**Irradiation Duration:**

9.999 s

**Patient Table Relationship:**

headfirst (F-10470, SRT)

**Patient Orientation:**

recumbent (F-10450, SRT)

Concept Modifier: Patient Orientation Modifier = supine (F-10340, SRT)

**Table Longitudinal Position:**

27.9000000000000 mm

**Table Lateral Position:**

1681.4 mm

**Table Head Tilt Angle:**

0 deg

**Table Cradle Tilt Angle:**

0 deg

**Target Region:**

Abdomen (T-D400, SRT)

**Number of Frames:**

150 1

**SubImages per Frame:**

1 1

**Wedges and Shutters****Bottom Shutter:**

100 mm

**Left Shutter:**

118 mm

**Right Shutter:**

118 mm

**Top Shutter:**

100 mm

**Beam Position**

**Longitudinal Beam Position:**

1156.000000000000 mm

**Beam Angle:**

0 deg

**Table Height Position:**

885 mm

## Irradiation Event X-Ray Data

Concept Modifier: Acquisition Plane = Single Plane (113622, DCM)

**DateTime Started:**

2014-03-13 16:29:42

**Irradiation Event Type:**

Fluoroscopy (P5-06000, SRT)

**Reference Point Definition:**

15cm below BeamIsocenter

**Acquired Image:**

[XA image](#)

**Irradiation Event UID:**

1.3.46.670589.28.961600801528.20140313162941716.1

**Dose Area Product:**

0.00011247286551 Gy.m2

**Dose (RP):**

0.00547291092745 Gy

**Positioner Primary Angle:**

-0.4 deg

**Positioner Secondary Angle:**

0.1 deg

### X-Ray Filters

**X-Ray Filter Type:**

Strip filter (113650, DCM)

**X-Ray Filter Material:**

Copper or Copper compound (C-127F9, SRT)

**X-Ray Filter Thickness Minimum:**

0.4 mm

**X-Ray Filter Thickness Maximum:**

0.4 mm

### X-Ray Filters

**X-Ray Filter Type:**

Strip filter (113650, DCM)

**X-Ray Filter Material:**

Aluminum or Aluminum compound (C-120F9, SRT)

**X-Ray Filter Thickness Minimum:**

1 mm

**X-Ray Filter Thickness Maximum:**

1 mm

**Fluoro Mode:**

Pulsed (113631, DCM)

**Pulse Rate:**

15 {pulse}/s

**Number of Pulses:**

250 1

**X-Ray Tube Current:**

122.3 mA

**Distance Source to Isocenter:**

810 mm

**KVP:**

98.18 kV

**Pulse Width:**

4 ms

**Distance Source to Detector:**

1040 mm

**Irradiation Duration:**

16.666 s

**Patient Table Relationship:**

headfirst (F-10470, SRT)

**Patient Orientation:**

recumbent (F-10450, SRT)

Concept Modifier: Patient Orientation Modifier = supine (F-10340, SRT)

**Table Longitudinal Position:**

27.90000000000000 mm

**Table Lateral Position:**

1681.4 mm

**Table Head Tilt Angle:**

0 deg

**Table Cradle Tilt Angle:**

0 deg

**Target Region:**

Abdomen (T-D400, SRT)

**Number of Frames:**

250 1

**SubImages per Frame:**

1 1

**Wedges and Shutters****Bottom Shutter:**

100 mm

**Left Shutter:**

118 mm

**Right Shutter:**

118 mm

**Top Shutter:**

100 mm

**Beam Position****Longitudinal Beam Position:**

1156.000000000000 mm

**Beam Angle:**

0 deg

**Table Height Position:**

885 mm

**Irradiation Event X-Ray Data**

Concept Modifier: Acquisition Plane = Single Plane (113622, DCM)

**DateTime Started:**

2014-03-13 16:30:49

**Irradiation Event Type:**

Fluoroscopy (P5-06000, SRT)

**Reference Point Definition:**

15cm below BeamIsocenter

**Acquired Image:**

[XA image](#)

**Irradiation Event UID:**

1.3.46.670589.28.961600801528.20140313163048856.1

**Dose Area Product:**

2.4957815343E-05 Gy.m2

**Dose (RP):**

0.00119146005509 Gy

**Positioner Primary Angle:**

-0.4 deg

**Positioner Secondary Angle:**

0.1 deg

**X-Ray Filters****X-Ray Filter Type:**

Strip filter (113650, DCM)

**X-Ray Filter Material:**

Copper or Copper compound (C-127F9, SRT)

**X-Ray Filter Thickness Minimum:**

0.4 mm

**X-Ray Filter Thickness Maximum:**

0.4 mm

**X-Ray Filters****X-Ray Filter Type:**

Strip filter (113650, DCM)

**X-Ray Filter Material:**

Aluminum or Aluminum compound (C-120F9, SRT)

**X-Ray Filter Thickness Minimum:**

1 mm

**X-Ray Filter Thickness Maximum:**

1 mm

**Fluoro Mode:**

Pulsed (113631, DCM)

**Pulse Rate:**

15 {pulse}/s

**Number of Pulses:**

55 1

**X-Ray Tube Current:**

121.7 mA

**Distance Source to Isocenter:**

810 mm

**KVP:**

98.65 kV

**Pulse Width:**

4 ms

**Distance Source to Detector:**

1040 mm

**Irradiation Duration:**

3.666 s

**Patient Table Relationship:**

headfirst (F-10470, SRT)

**Patient Orientation:**

recumbent (F-10450, SRT)

Concept Modifier: Patient Orientation Modifier = supine (F-10340, SRT)

**Table Longitudinal Position:**

27.9000000000000 mm

**Table Lateral Position:**

1681.4 mm

**Table Head Tilt Angle:**

0 deg

**Table Cradle Tilt Angle:**

0 deg

**Target Region:**

Abdomen (T-D400, SRT)

**Number of Frames:**

55 1

**SubImages per Frame:**

1 1

## Wedges and Shutters

**Bottom Shutter:**

100 mm

**Left Shutter:**

118 mm

**Right Shutter:**

118 mm

**Top Shutter:**

100 mm

## Beam Position

**Longitudinal Beam Position:**

1156.000000000000 mm

**Beam Angle:**

0 deg

**Table Height Position:**

885 mm

## Irradiation Event X-Ray Data

Concept Modifier: Acquisition Plane = Single Plane (113622, DCM)

**DateTime Started:**

2014-03-13 16:31:17

**Irradiation Event Type:**

Fluoroscopy (P5-06000, SRT)

**Reference Point Definition:**

15cm below BeamIsocenter

**Irradiation Event UID:**

1.3.46.670589.28.961600801528.20140313163116419.1

**Dose Area Product:**

2.2878714187E-05 Gy.m2

**Dose (RP):**

0.00074150596877 Gy

**Positioner Primary Angle:**

-0.4 deg

**Positioner Secondary Angle:**

0.1 deg

## X-Ray Filters

**X-Ray Filter Type:**

Strip filter (113650, DCM)

**X-Ray Filter Material:**

Copper or Copper compound (C-127F9, SRT)

**X-Ray Filter Thickness Minimum:**

0.4 mm

**X-Ray Filter Thickness Maximum:**

0.4 mm

## **X-Ray Filters**

**X-Ray Filter Type:**

Strip filter (113650, DCM)

**X-Ray Filter Material:**

Aluminum or Aluminum compound (C-120F9, SRT)

**X-Ray Filter Thickness Minimum:**

1 mm

**X-Ray Filter Thickness Maximum:**

1 mm

**Fluoro Mode:**

Pulsed (113631, DCM)

**Pulse Rate:**

15 {pulse}/s

**Number of Pulses:**

36 1

**X-Ray Tube Current:**

125.7 mA

**Distance Source to Isocenter:**

810 mm

**KVP:**

95.49 kV

**Pulse Width:**

4 ms

**Irradiation Duration:**

2.4 s

**Patient Table Relationship:**

headfirst (F-10470, SRT)

**Patient Orientation:**

recumbent (F-10450, SRT)

Concept Modifier: Patient Orientation Modifier = supine (F-10340, SRT)

**Table Longitudinal Position:**

27.9000000000000 mm

**Table Lateral Position:**

1681.4 mm

**Table Head Tilt Angle:**

0 deg

**Table Cradle Tilt Angle:**

0 deg

**Target Region:**

Abdomen (T-D400, SRT)

**Number of Frames:**

36 1

**SubImages per Frame:**

1 1

## **Wedges and Shutters**

**Bottom Shutter:**

137.5 mm

**Left Shutter:**

144 mm

**Right Shutter:**

144 mm

**Top Shutter:**

137.5 mm

**Beam Position****Longitudinal Beam Position:**

1156.000000000000 mm

**Beam Angle:**

0 deg

**Table Height Position:**

885 mm

**Irradiation Event X-Ray Data**

Concept Modifier: Acquisition Plane = Single Plane (113622, DCM)

**DateTime Started:**

2014-03-13 16:32:03

**Irradiation Event Type:**

Stationary Acquisition (113611, DCM)

**Reference Point Definition:**

15cm below BeamIsocenter

**Acquired Image:**

[XA image](#)

**Irradiation Event UID:**

1.3.46.670589.28.961600801528.20140313163203122.1

**Dose Area Product:**

0.00124217725733 Gy.m2

**Dose (RP):**

0.03782139577594 Gy

**Positioner Primary Angle:**

-0.4 deg

**Positioner Secondary Angle:**

0.1 deg

**X-Ray Filters****X-Ray Filter Type:**

Strip filter (113650, DCM)

**X-Ray Filter Material:**

Copper or Copper compound (C-127F9, SRT)

**X-Ray Filter Thickness Minimum:**

0.1 mm



**X-Ray Filter Thickness Maximum:**

0.1 mm

**X-Ray Filters****X-Ray Filter Type:**

Strip filter (113650, DCM)

**X-Ray Filter Material:**

Aluminum or Aluminum compound (C-120F9, SRT)

**X-Ray Filter Thickness Minimum:**

1 mm

**X-Ray Filter Thickness Maximum:**

1 mm

**X-Ray Tube Current:**

420 mA

**Distance Source to Isocenter:**

810 mm

**KVP:**

80 kV

**Pulse Width:**

81.5 ms

**Distance Source to Detector:**

1040 mm

**Irradiation Duration:**

7.333 s

**Patient Table Relationship:**

headfirst (F-10470, SRT)

**Patient Orientation:**

recumbent (F-10450, SRT)

Concept Modifier: Patient Orientation Modifier = supine (F-10340, SRT)

**Table Longitudinal Position:**

27.9000000000000 mm

**Table Lateral Position:**

1681.4 mm

**Table Head Tilt Angle:**

0 deg

**Table Cradle Tilt Angle:**

0 deg

**Target Region:**

Abdomen (T-D400, SRT)

**Number of Frames:**

20 1

**SubImages per Frame:**

1 1

**Wedges and Shutters****Bottom Shutter:**

137.5 mm

**Left Shutter:**

144 mm

**Right Shutter:**

144 mm

**Top Shutter:**

137.5 mm

## Beam Position

**Longitudinal Beam Position:**

1156.000000000000 mm

**Beam Angle:**

0 deg

**Table Height Position:**

885 mm

## Irradiation Event X-Ray Data

Concept Modifier: Acquisition Plane = Single Plane (113622, DCM)

**DateTime Started:**

2014-03-13 16:32:37

**Irradiation Event Type:**

Stationary Acquisition (113611, DCM)

**Reference Point Definition:**

15cm below BeamIsocenter

**Acquired Image:**

[XA image](#)

**Irradiation Event UID:**

1.3.46.670589.28.961600801528.20140313163236778.1

**Dose Area Product:**

0.00230592403181 Gy.m2

**Dose (RP):**

0.07018135904499 Gy

**Positioner Primary Angle:**

-0.4 deg

**Positioner Secondary Angle:**

0.1 deg

## X-Ray Filters

**X-Ray Filter Type:**

Strip filter (113650, DCM)

**X-Ray Filter Material:**

Copper or Copper compound (C-127F9, SRT)

**X-Ray Filter Thickness Minimum:**

0.1 mm

**X-Ray Filter Thickness Maximum:**

0.1 mm

## **X-Ray Filters**

**X-Ray Filter Type:**

Strip filter (113650, DCM)

**X-Ray Filter Material:**

Aluminum or Aluminum compound (C-120F9, SRT)

**X-Ray Filter Thickness Minimum:**

1 mm

**X-Ray Filter Thickness Maximum:**

1 mm

**X-Ray Tube Current:**

420 mA

**Distance Source to Isocenter:**

810 mm

**KVP:**

80 kV

**Pulse Width:**

85.9 ms

**Distance Source to Detector:**

1040 mm

**Irradiation Duration:**

16.333 s

**Patient Table Relationship:**

headfirst (F-10470, SRT)

**Patient Orientation:**

recumbent (F-10450, SRT)

Concept Modifier: Patient Orientation Modifier = supine (F-10340, SRT)

**Table Longitudinal Position:**

27.9000000000000 mm

**Table Lateral Position:**

1681.4 mm

**Table Head Tilt Angle:**

0 deg

**Table Cradle Tilt Angle:**

0 deg

**Target Region:**

Abdomen (T-D400, SRT)

**Number of Frames:**

35 1

**SubImages per Frame:**

1 1

## **Wedges and Shutters**

**Bottom Shutter:**

137.5 mm

**Left Shutter:**

144 mm

**Right Shutter:**

144 mm

**Top Shutter:**

137.5 mm

**Beam Position****Longitudinal Beam Position:**

1156.000000000000 mm

**Beam Angle:**

0 deg

**Table Height Position:**

885 mm

**Irradiation Event X-Ray Data**

Concept Modifier: Acquisition Plane = Single Plane (113622, DCM)

**DateTime Started:**

2014-03-13 16:36:35

**Irradiation Event Type:**

Fluoroscopy (P5-06000, SRT)

**Reference Point Definition:**

15cm below BeamIsocenter

**Irradiation Event UID:**

1.3.46.670589.28.961600801528.20140313163635263.1

**Dose Area Product:**

0.00011184981572 Gy.m2

**Dose (RP):**

0.00322084481175 Gy

**Positioner Primary Angle:**

-0.4 deg

**Positioner Secondary Angle:**

0.1 deg

**X-Ray Filters****X-Ray Filter Type:**

Strip filter (113650, DCM)

**X-Ray Filter Material:**

Copper or Copper compound (C-127F9, SRT)

**X-Ray Filter Thickness Minimum:**

0.4 mm

**X-Ray Filter Thickness Maximum:**

0.4 mm

**X-Ray Filters**

**X-Ray Filter Type:**

Strip filter (113650, DCM)

**X-Ray Filter Material:**

Aluminum or Aluminum compound (C-120F9, SRT)

**X-Ray Filter Thickness Minimum:**

1 mm

**X-Ray Filter Thickness Maximum:**

1 mm

**Fluoro Mode:**

Pulsed (113631, DCM)

**Pulse Rate:**

15 {pulse}/s

**Number of Pulses:**

162 1

**X-Ray Tube Current:**

126.5 mA

**Distance Source to Isocenter:**

810 mm

**KVP:**

94.89 kV

**Pulse Width:**

4 ms

**Irradiation Duration:**

10.799 s

**Patient Table Relationship:**

headfirst (F-10470, SRT)

**Patient Orientation:**

recumbent (F-10450, SRT)

Concept Modifier: Patient Orientation Modifier = supine (F-10340, SRT)

**Table Longitudinal Position:**

27.9000000000000 mm

**Table Lateral Position:**

1681.4 mm

**Table Head Tilt Angle:**

0 deg

**Table Cradle Tilt Angle:**

0 deg

**Target Region:**

Abdomen (T-D400, SRT)

**Number of Frames:**

162 1

**SubImages per Frame:**

1 1

**Wedges and Shutters****Bottom Shutter:**

137.5 mm

**Left Shutter:**

144 mm

**Right Shutter:**

144 mm

**Top Shutter:**

137.5 mm

**Beam Position****Longitudinal Beam Position:**

1156.000000000000 mm

**Beam Angle:**

0 deg

**Table Height Position:**

885 mm

**Irradiation Event X-Ray Data**

Concept Modifier: Acquisition Plane = Single Plane (113622, DCM)

**DateTime Started:**

2014-03-13 16:36:47

**Irradiation Event Type:**

Fluoroscopy (P5-06000, SRT)

**Reference Point Definition:**

15cm below BeamIsocenter

**Irradiation Event UID:**

1.3.46.670589.28.961600801528.20140313163647528.1

**Dose Area Product:**

4.4425394013E-05 Gy.m2

**Dose (RP):**

0.00126951331496 Gy

**Positioner Primary Angle:**

-0.4 deg

**Positioner Secondary Angle:**

0.1 deg

**X-Ray Filters****X-Ray Filter Type:**

Strip filter (113650, DCM)

**X-Ray Filter Material:**

Copper or Copper compound (C-127F9, SRT)

**X-Ray Filter Thickness Minimum:**

0.4 mm

**X-Ray Filter Thickness Maximum:**

0.4 mm

**X-Ray Filters**

**X-Ray Filter Type:**

Strip filter (113650, DCM)

**X-Ray Filter Material:**

Aluminum or Aluminum compound (C-120F9, SRT)

**X-Ray Filter Thickness Minimum:**

1 mm

**X-Ray Filter Thickness Maximum:**

1 mm

**Fluoro Mode:**

Pulsed (113631, DCM)

**Pulse Rate:**

15 {pulse}/s

**Number of Pulses:**

64 1

**X-Ray Tube Current:**

126.1 mA

**Distance Source to Isocenter:**

810 mm

**KVP:**

95.16 kV

**Pulse Width:**

4 ms

**Irradiation Duration:**

4.266 s

**Patient Table Relationship:**

headfirst (F-10470, SRT)

**Patient Orientation:**

recumbent (F-10450, SRT)

Concept Modifier: Patient Orientation Modifier = supine (F-10340, SRT)

**Table Longitudinal Position:**

27.90000000000000 mm

**Table Lateral Position:**

1681.4 mm

**Table Head Tilt Angle:**

0 deg

**Table Cradle Tilt Angle:**

0 deg

**Target Region:**

Abdomen (T-D400, SRT)

**Number of Frames:**

64 1

**SubImages per Frame:**

1 1

**Wedges and Shutters****Bottom Shutter:**

137.5 mm

**Left Shutter:**

144 mm

**Right Shutter:**

144 mm

**Top Shutter:**

137.5 mm

**Beam Position****Longitudinal Beam Position:**

1156.000000000000 mm

**Beam Angle:**

0 deg

**Table Height Position:**

885 mm

**Irradiation Event X-Ray Data**

Concept Modifier: Acquisition Plane = Single Plane (113622, DCM)

**DateTime Started:**

2014-03-13 16:37:32

**Irradiation Event Type:**

Fluoroscopy (P5-06000, SRT)

**Reference Point Definition:**

15cm below BeamIsocenter

**Irradiation Event UID:**

1.3.46.670589.28.961600801528.20140313163731747.1

**Dose Area Product:**

9.4933918711E-05 Gy.m2

**Dose (RP):**

0.00365013774104 Gy

**Positioner Primary Angle:**

-0.4 deg

**Positioner Secondary Angle:**

0.1 deg

**X-Ray Filters****X-Ray Filter Type:**

Strip filter (113650, DCM)

**X-Ray Filter Material:**

Copper or Copper compound (C-127F9, SRT)

**X-Ray Filter Thickness Minimum:**

0.4 mm

**X-Ray Filter Thickness Maximum:**

0.4 mm

**X-Ray Filters**



**X-Ray Filter Type:**

Strip filter (113650, DCM)

**X-Ray Filter Material:**

Aluminum or Aluminum compound (C-120F9, SRT)

**X-Ray Filter Thickness Minimum:**

1 mm

**X-Ray Filter Thickness Maximum:**

1 mm

**Fluoro Mode:**

Pulsed (113631, DCM)

**Pulse Rate:**

15 {pulse}/s

**Number of Pulses:**

174 1

**X-Ray Tube Current:**

123.8 mA

**Distance Source to Isocenter:**

810 mm

**KVP:**

96.96 kV

**Pulse Width:**

4 ms

**Irradiation Duration:**

11.599 s

**Patient Table Relationship:**

headfirst (F-10470, SRT)

**Patient Orientation:**

recumbent (F-10450, SRT)

Concept Modifier: Patient Orientation Modifier = supine (F-10340, SRT)

**Table Longitudinal Position:**

27.90000000000000 mm

**Table Lateral Position:**

1681.4 mm

**Table Head Tilt Angle:**

0 deg

**Table Cradle Tilt Angle:**

0 deg

**Target Region:**

Abdomen (T-D400, SRT)

**Number of Frames:**

174 1

**SubImages per Frame:**

1 1

**Wedges and Shutters****Bottom Shutter:**

116 mm

**Left Shutter:**

121.5 mm

**Right Shutter:**

121.5 mm

**Top Shutter:**

116 mm

**Beam Position****Longitudinal Beam Position:**

1156.000000000000 mm

**Beam Angle:**

0 deg

**Table Height Position:**

885 mm

**Irradiation Event X-Ray Data**

Concept Modifier: Acquisition Plane = Single Plane (113622, DCM)

**DateTime Started:**

2014-03-13 16:37:48

**Irradiation Event Type:**

Fluoroscopy (P5-06000, SRT)

**Reference Point Definition:**

15cm below BeamIsocenter

**Irradiation Event UID:**

1.3.46.670589.28.961600801528.20140313163747763.1

**Dose Area Product:**

5.1643370099E-05 Gy.m2

**Dose (RP):**

0.00212121212121 Gy

**Positioner Primary Angle:**

-0.4 deg

**Positioner Secondary Angle:**

0.1 deg

**X-Ray Filters****X-Ray Filter Type:**

Strip filter (113650, DCM)

**X-Ray Filter Material:**

Copper or Copper compound (C-127F9, SRT)

**X-Ray Filter Thickness Minimum:**

0.4 mm

**X-Ray Filter Thickness Maximum:**

0.4 mm

**X-Ray Filters**

**X-Ray Filter Type:**

Strip filter (113650, DCM)

**X-Ray Filter Material:**

Aluminum or Aluminum compound (C-120F9, SRT)

**X-Ray Filter Thickness Minimum:**

1 mm

**X-Ray Filter Thickness Maximum:**

1 mm

**Fluoro Mode:**

Pulsed (113631, DCM)

**Pulse Rate:**

15 {pulse}/s

**Number of Pulses:**

99 1

**X-Ray Tube Current:**

123.6 mA

**Distance Source to Isocenter:**

810 mm

**KVP:**

97.15 kV

**Pulse Width:**

4 ms

**Irradiation Duration:**

6.599 s

**Patient Table Relationship:**

headfirst (F-10470, SRT)

**Patient Orientation:**

recumbent (F-10450, SRT)

Concept Modifier: Patient Orientation Modifier = supine (F-10340, SRT)

**Table Longitudinal Position:**

27.90000000000000 mm

**Table Lateral Position:**

1681.4 mm

**Table Head Tilt Angle:**

0 deg

**Table Cradle Tilt Angle:**

0 deg

**Target Region:**

Abdomen (T-D400, SRT)

**Number of Frames:**

99 1

**SubImages per Frame:**

1 1

**Wedges and Shutters****Bottom Shutter:**

116 mm

**Left Shutter:**

121.5 mm

**Right Shutter:**

121.5 mm

**Top Shutter:**

116 mm

**Beam Position****Longitudinal Beam Position:**

1156.000000000000 mm

**Beam Angle:**

0 deg

**Table Height Position:**

885 mm

**Irradiation Event X-Ray Data**

Concept Modifier: Acquisition Plane = Single Plane (113622, DCM)

**DateTime Started:**

2014-03-13 16:38:03

**Irradiation Event Type:**

Fluoroscopy (P5-06000, SRT)

**Reference Point Definition:**

15cm below BeamIsocenter

**Irradiation Event UID:**

1.3.46.670589.28.961600801528.20140313163803231.1

**Dose Area Product:**

3.8273714179E-05 Gy.m2

**Dose (RP):**

0.00169880624426 Gy

**Positioner Primary Angle:**

-0.4 deg

**Positioner Secondary Angle:**

0.1 deg

**X-Ray Filters****X-Ray Filter Type:**

Strip filter (113650, DCM)

**X-Ray Filter Material:**

Copper or Copper compound (C-127F9, SRT)

**X-Ray Filter Thickness Minimum:**

0.4 mm

**X-Ray Filter Thickness Maximum:**

0.4 mm

**X-Ray Filters**

**X-Ray Filter Type:**

Strip filter (113650, DCM)

**X-Ray Filter Material:**

Aluminum or Aluminum compound (C-120F9, SRT)

**X-Ray Filter Thickness Minimum:**

1 mm

**X-Ray Filter Thickness Maximum:**

1 mm

**Fluoro Mode:**

Pulsed (113631, DCM)

**Pulse Rate:**

15 {pulse}/s

**Number of Pulses:**

79 1

**X-Ray Tube Current:**

123.3 mA

**Distance Source to Isocenter:**

810 mm

**KVP:**

97.38 kV

**Pulse Width:**

4 ms

**Irradiation Duration:**

5.266 s

**Patient Table Relationship:**

headfirst (F-10470, SRT)

**Patient Orientation:**

recumbent (F-10450, SRT)

Concept Modifier: Patient Orientation Modifier = supine (F-10340, SRT)

**Table Longitudinal Position:**

27.90000000000000 mm

**Table Lateral Position:**

1681.4 mm

**Table Head Tilt Angle:**

0 deg

**Table Cradle Tilt Angle:**

0 deg

**Target Region:**

Abdomen (T-D400, SRT)

**Number of Frames:**

79 1

**SubImages per Frame:**

1 1

**Wedges and Shutters****Bottom Shutter:**

116 mm

**Left Shutter:**

121.5 mm

**Right Shutter:**

121.5 mm

**Top Shutter:**

116 mm

**Beam Position****Longitudinal Beam Position:**

1156.000000000000 mm

**Beam Angle:**

0 deg

**Table Height Position:**

885 mm

**Irradiation Event X-Ray Data**

Concept Modifier: Acquisition Plane = Single Plane (113622, DCM)

**DateTime Started:**

2014-03-13 16:39:22

**Irradiation Event Type:**

Fluoroscopy (P5-06000, SRT)

**Reference Point Definition:**

15cm below BeamIsocenter

**Irradiation Event UID:**

1.3.46.670589.28.961600801528.20140313163922278.1

**Dose Area Product:**

6.0662620355E-05 Gy.m2

**Dose (RP):**

0.00241046831955 Gy

**Positioner Primary Angle:**

-0.4 deg

**Positioner Secondary Angle:**

0.1 deg

**X-Ray Filters****X-Ray Filter Type:**

Strip filter (113650, DCM)

**X-Ray Filter Material:**

Copper or Copper compound (C-127F9, SRT)

**X-Ray Filter Thickness Minimum:**

0.4 mm

**X-Ray Filter Thickness Maximum:**

0.4 mm

**X-Ray Filters**

**X-Ray Filter Type:**

Strip filter (113650, DCM)

**X-Ray Filter Material:**

Aluminum or Aluminum compound (C-120F9, SRT)

**X-Ray Filter Thickness Minimum:**

1 mm

**X-Ray Filter Thickness Maximum:**

1 mm

**Fluoro Mode:**

Pulsed (113631, DCM)

**Pulse Rate:**

15 {pulse}/s

**Number of Pulses:**

114 1

**X-Ray Tube Current:**

122.4 mA

**Distance Source to Isocenter:**

810 mm

**KVP:**

98.07 kV

**Pulse Width:**

4 ms

**Irradiation Duration:**

7.599 s

**Patient Table Relationship:**

headfirst (F-10470, SRT)

**Patient Orientation:**

recumbent (F-10450, SRT)

Concept Modifier: Patient Orientation Modifier = supine (F-10340, SRT)

**Table Longitudinal Position:**

27.9000000000000 mm

**Table Lateral Position:**

1681.4 mm

**Table Head Tilt Angle:**

0 deg

**Table Cradle Tilt Angle:**

0 deg

**Target Region:**

Abdomen (T-D400, SRT)

**Number of Frames:**

114 1

**SubImages per Frame:**

1 1

**Wedges and Shutters****Bottom Shutter:**

116 mm

**Left Shutter:**

121.5 mm

**Right Shutter:**

121.5 mm

**Top Shutter:**

116 mm

**Beam Position****Longitudinal Beam Position:**

1156.000000000000 mm

**Beam Angle:**

0 deg

**Table Height Position:**

885 mm

**Irradiation Event X-Ray Data**

Concept Modifier: Acquisition Plane = Single Plane (113622, DCM)

**DateTime Started:**

2014-03-13 16:39:40

**Irradiation Event Type:**

Fluoroscopy (P5-06000, SRT)

**Reference Point Definition:**

15cm below BeamIsocenter

**Irradiation Event UID:**

1.3.46.670589.28.961600801528.20140313163939434.1

**Dose Area Product:**

0.00042649316782 Gy.m2

**Dose (RP):**

0.0172222222222222 Gy

**Positioner Primary Angle:**

-0.4 deg

**Positioner Secondary Angle:**

0.1 deg

**X-Ray Filters****X-Ray Filter Type:**

Strip filter (113650, DCM)

**X-Ray Filter Material:**

Copper or Copper compound (C-127F9, SRT)

**X-Ray Filter Thickness Minimum:**

0.4 mm

**X-Ray Filter Thickness Maximum:**

0.4 mm

**X-Ray Filters**



**X-Ray Filter Type:**

Strip filter (113650, DCM)

**X-Ray Filter Material:**

Aluminum or Aluminum compound (C-120F9, SRT)

**X-Ray Filter Thickness Minimum:**

1 mm

**X-Ray Filter Thickness Maximum:**

1 mm

**Fluoro Mode:**

Pulsed (113631, DCM)

**Pulse Rate:**

15 {pulse}/s

**Number of Pulses:**

796 1

**X-Ray Tube Current:**

121.6 mA

**Distance Source to Isocenter:**

810 mm

**KVP:**

98.68 kV

**Pulse Width:**

4 ms

**Irradiation Duration:**

53.066 s

**Patient Table Relationship:**

headfirst (F-10470, SRT)

**Patient Orientation:**

recumbent (F-10450, SRT)

Concept Modifier: Patient Orientation Modifier = supine (F-10340, SRT)

**Table Longitudinal Position:**

27.90000000000000 mm

**Table Lateral Position:**

1681.4 mm

**Table Head Tilt Angle:**

0 deg

**Table Cradle Tilt Angle:**

0 deg

**Target Region:**

Abdomen (T-D400, SRT)

**Number of Frames:**

796 1

**SubImages per Frame:**

1 1

**Wedges and Shutters****Bottom Shutter:**

116 mm

**Left Shutter:**

121.5 mm

**Right Shutter:**

121.5 mm

**Top Shutter:**

116 mm

**Beam Position****Longitudinal Beam Position:**

1156.000000000000 mm

**Beam Angle:**

0 deg

**Table Height Position:**

885 mm

**Irradiation Event X-Ray Data**

Concept Modifier: Acquisition Plane = Single Plane (113622, DCM)

**DateTime Started:**

2014-03-13 16:41:01

**Irradiation Event Type:**

Fluoroscopy (P5-06000, SRT)

**Reference Point Definition:**

15cm below BeamIsocenter

**Irradiation Event UID:**

1.3.46.670589.28.961600801528.20140313164100497.1

**Dose Area Product:**

0.00016191340624 Gy.m2

**Dose (RP):**

0.00660009182736 Gy

**Positioner Primary Angle:**

-0.4 deg

**Positioner Secondary Angle:**

0.1 deg

**X-Ray Filters****X-Ray Filter Type:**

Strip filter (113650, DCM)

**X-Ray Filter Material:**

Copper or Copper compound (C-127F9, SRT)

**X-Ray Filter Thickness Minimum:**

0.4 mm

**X-Ray Filter Thickness Maximum:**

0.4 mm

**X-Ray Filters**

**X-Ray Filter Type:**

Strip filter (113650, DCM)

**X-Ray Filter Material:**

Aluminum or Aluminum compound (C-120F9, SRT)

**X-Ray Filter Thickness Minimum:**

1 mm

**X-Ray Filter Thickness Maximum:**

1 mm

**Fluoro Mode:**

Pulsed (113631, DCM)

**Pulse Rate:**

15 {pulse}/s

**Number of Pulses:**

299 1

**X-Ray Tube Current:**

121.3 mA

**Distance Source to Isocenter:**

810 mm

**KVP:**

98.96 kV

**Pulse Width:**

4 ms

**Irradiation Duration:**

19.933 s

**Patient Table Relationship:**

headfirst (F-10470, SRT)

**Patient Orientation:**

recumbent (F-10450, SRT)

Concept Modifier: Patient Orientation Modifier = supine (F-10340, SRT)

**Table Longitudinal Position:**

27.90000000000000 mm

**Table Lateral Position:**

1681.4 mm

**Table Head Tilt Angle:**

0 deg

**Table Cradle Tilt Angle:**

0 deg

**Target Region:**

Abdomen (T-D400, SRT)

**Number of Frames:**

299 1

**SubImages per Frame:**

1 1

**Wedges and Shutters****Bottom Shutter:**

116 mm

**Left Shutter:**

121.5 mm

**Right Shutter:**

121.5 mm

**Top Shutter:**

116 mm

**Beam Position****Longitudinal Beam Position:**

1156.000000000000 mm

**Beam Angle:**

0 deg

**Table Height Position:**

885 mm

**Irradiation Event X-Ray Data**

Concept Modifier: Acquisition Plane = Single Plane (113622, DCM)

**DateTime Started:**

2014-03-13 16:41:48

**Irradiation Event Type:**

Fluoroscopy (P5-06000, SRT)

**Reference Point Definition:**

15cm below BeamIsocenter

**Irradiation Event UID:**

1.3.46.670589.28.961600801528.20140313164148325.1

**Dose Area Product:**

7.2240317886E-05 Gy.m2

**Dose (RP):**

0.00291322314049 Gy

**Positioner Primary Angle:**

-0.4 deg

**Positioner Secondary Angle:**

0.1 deg

**X-Ray Filters****X-Ray Filter Type:**

Strip filter (113650, DCM)

**X-Ray Filter Material:**

Copper or Copper compound (C-127F9, SRT)

**X-Ray Filter Thickness Minimum:**

0.4 mm

**X-Ray Filter Thickness Maximum:**

0.4 mm

**X-Ray Filters**

**X-Ray Filter Type:**

Strip filter (113650, DCM)

**X-Ray Filter Material:**

Aluminum or Aluminum compound (C-120F9, SRT)

**X-Ray Filter Thickness Minimum:**

1 mm

**X-Ray Filter Thickness Maximum:**

1 mm

**Fluoro Mode:**

Pulsed (113631, DCM)

**Pulse Rate:**

15 {pulse}/s

**Number of Pulses:**

132 1

**X-Ray Tube Current:**

120.8 mA

**Distance Source to Isocenter:**

810 mm

**KVP:**

99.39 kV

**Pulse Width:**

4 ms

**Irradiation Duration:**

8.799 s

**Patient Table Relationship:**

headfirst (F-10470, SRT)

**Patient Orientation:**

recumbent (F-10450, SRT)

Concept Modifier: Patient Orientation Modifier = supine (F-10340, SRT)

**Table Longitudinal Position:**

27.90000000000000 mm

**Table Lateral Position:**

1681.4 mm

**Table Head Tilt Angle:**

0 deg

**Table Cradle Tilt Angle:**

0 deg

**Target Region:**

Abdomen (T-D400, SRT)

**Number of Frames:**

132 1

**SubImages per Frame:**

1 1

**Wedges and Shutters****Bottom Shutter:**

116 mm

**Left Shutter:**

121.5 mm

**Right Shutter:**

121.5 mm

**Top Shutter:**

116 mm

**Beam Position****Longitudinal Beam Position:**

1156.000000000000 mm

**Beam Angle:**

0 deg

**Table Height Position:**

885 mm

**Irradiation Event X-Ray Data**

Concept Modifier: Acquisition Plane = Single Plane (113622, DCM)

**DateTime Started:**

2014-03-13 16:42:03

**Irradiation Event Type:**

Fluoroscopy (P5-06000, SRT)

**Reference Point Definition:**

15cm below BeamIsocenter

**Irradiation Event UID:**

1.3.46.670589.28.961600801528.20140313164203184.1

**Dose Area Product:**

5.0996734317E-05 Gy.m2

**Dose (RP):**

0.00209366391184 Gy

**Positioner Primary Angle:**

-0.4 deg

**Positioner Secondary Angle:**

0.1 deg

**X-Ray Filters****X-Ray Filter Type:**

Strip filter (113650, DCM)

**X-Ray Filter Material:**

Copper or Copper compound (C-127F9, SRT)

**X-Ray Filter Thickness Minimum:**

0.4 mm

**X-Ray Filter Thickness Maximum:**

0.4 mm

**X-Ray Filters**

**X-Ray Filter Type:**

Strip filter (113650, DCM)

**X-Ray Filter Material:**

Aluminum or Aluminum compound (C-120F9, SRT)

**X-Ray Filter Thickness Minimum:**

1 mm

**X-Ray Filter Thickness Maximum:**

1 mm

**Fluoro Mode:**

Pulsed (113631, DCM)

**Pulse Rate:**

15 {pulse}/s

**Number of Pulses:**

93 1

**X-Ray Tube Current:**

120.7 mA

**Distance Source to Isocenter:**

810 mm

**KVP:**

99.48 kV

**Pulse Width:**

4 ms

**Irradiation Duration:**

6.199 s

**Patient Table Relationship:**

headfirst (F-10470, SRT)

**Patient Orientation:**

recumbent (F-10450, SRT)

Concept Modifier: Patient Orientation Modifier = supine (F-10340, SRT)

**Table Longitudinal Position:**

27.90000000000000 mm

**Table Lateral Position:**

1681.4 mm

**Table Head Tilt Angle:**

0 deg

**Table Cradle Tilt Angle:**

0 deg

**Target Region:**

Abdomen (T-D400, SRT)

**Number of Frames:**

93 1

**SubImages per Frame:**

1 1

**Wedges and Shutters****Bottom Shutter:**

116 mm

**Left Shutter:**

121.5 mm

**Right Shutter:**

121.5 mm

**Top Shutter:**

116 mm

**Beam Position****Longitudinal Beam Position:**

1156.000000000000 mm

**Beam Angle:**

0 deg

**Table Height Position:**

885 mm

**Irradiation Event X-Ray Data**

Concept Modifier: Acquisition Plane = Single Plane (113622, DCM)

**DateTime Started:**

2014-03-13 16:42:39

**Irradiation Event Type:**

Fluoroscopy (P5-06000, SRT)

**Reference Point Definition:**

15cm below BeamIsocenter

**Irradiation Event UID:**

1.3.46.670589.28.961600801528.20140313164238840.1

**Dose Area Product:**

9.7587994350E-05 Gy.m2

**Dose (RP):**

0.00394398530762 Gy

**Positioner Primary Angle:**

-0.4 deg

**Positioner Secondary Angle:**

0.1 deg

**X-Ray Filters****X-Ray Filter Type:**

Strip filter (113650, DCM)

**X-Ray Filter Material:**

Copper or Copper compound (C-127F9, SRT)

**X-Ray Filter Thickness Minimum:**

0.4 mm

**X-Ray Filter Thickness Maximum:**

0.4 mm

**X-Ray Filters**



**X-Ray Filter Type:**

Strip filter (113650, DCM)

**X-Ray Filter Material:**

Aluminum or Aluminum compound (C-120F9, SRT)

**X-Ray Filter Thickness Minimum:**

1 mm

**X-Ray Filter Thickness Maximum:**

1 mm

**Fluoro Mode:**

Pulsed (113631, DCM)

**Pulse Rate:**

15 {pulse}/s

**Number of Pulses:**

178 1

**X-Ray Tube Current:**

120.9 mA

**Distance Source to Isocenter:**

810 mm

**KVP:**

99.25 kV

**Pulse Width:**

4 ms

**Irradiation Duration:**

11.866 s

**Patient Table Relationship:**

headfirst (F-10470, SRT)

**Patient Orientation:**

recumbent (F-10450, SRT)

Concept Modifier: Patient Orientation Modifier = supine (F-10340, SRT)

**Table Longitudinal Position:**

27.90000000000000 mm

**Table Lateral Position:**

1681.4 mm

**Table Head Tilt Angle:**

0 deg

**Table Cradle Tilt Angle:**

0 deg

**Target Region:**

Abdomen (T-D400, SRT)

**Number of Frames:**

178 1

**SubImages per Frame:**

1 1

**Wedges and Shutters****Bottom Shutter:**

116 mm

**Left Shutter:**

121.5 mm

**Right Shutter:**

121.5 mm

**Top Shutter:**

116 mm

**Beam Position****Longitudinal Beam Position:**

1156.000000000000 mm

**Beam Angle:**

0 deg

**Table Height Position:**

885 mm

**Irradiation Event X-Ray Data**

Concept Modifier: Acquisition Plane = Single Plane (113622, DCM)

**DateTime Started:**

2014-03-13 16:42:57

**Irradiation Event Type:**

Fluoroscopy (P5-06000, SRT)

**Reference Point Definition:**

15cm below BeamIsocenter

**Irradiation Event UID:**

1.3.46.670589.28.961600801528.20140313164257449.1

**Dose Area Product:**

0.00122556453005 Gy.m2

**Dose (RP):**

0.05197887970615 Gy

**Positioner Primary Angle:**

-0.4 deg

**Positioner Secondary Angle:**

0.1 deg

**X-Ray Filters****X-Ray Filter Type:**

Strip filter (113650, DCM)

**X-Ray Filter Material:**

Copper or Copper compound (C-127F9, SRT)

**X-Ray Filter Thickness Minimum:**

0.4 mm

**X-Ray Filter Thickness Maximum:**

0.4 mm

**X-Ray Filters**

**X-Ray Filter Type:**

Strip filter (113650, DCM)

**X-Ray Filter Material:**

Aluminum or Aluminum compound (C-120F9, SRT)

**X-Ray Filter Thickness Minimum:**

1 mm

**X-Ray Filter Thickness Maximum:**

1 mm

**Fluoro Mode:**

Pulsed (113631, DCM)

**Pulse Rate:**

15 {pulse}/s

**Number of Pulses:**

2335 1

**X-Ray Tube Current:**

117.4 mA

**Distance Source to Isocenter:**

810 mm

**KVP:**

103.37 kV

**Pulse Width:**

4 ms

**Irradiation Duration:**

155.666 s

**Patient Table Relationship:**

headfirst (F-10470, SRT)

**Patient Orientation:**

recumbent (F-10450, SRT)

Concept Modifier: Patient Orientation Modifier = supine (F-10340, SRT)

**Table Longitudinal Position:**

27.9000000000000 mm

**Table Lateral Position:**

1681.4 mm

**Table Head Tilt Angle:**

0 deg

**Table Cradle Tilt Angle:**

0 deg

**Target Region:**

Abdomen (T-D400, SRT)

**Number of Frames:**

2335 1

**SubImages per Frame:**

1 1

**Wedges and Shutters****Bottom Shutter:**

92.5 mm

**Left Shutter:**

112 mm

**Right Shutter:**

112 mm

**Top Shutter:**

92.5 mm

**Beam Position****Longitudinal Beam Position:**

1156.000000000000 mm

**Beam Angle:**

0 deg

**Table Height Position:**

885 mm

**Irradiation Event X-Ray Data**

Concept Modifier: Acquisition Plane = Single Plane (113622, DCM)

**DateTime Started:**

2014-03-13 16:46:06

**Irradiation Event Type:**

Fluoroscopy (P5-06000, SRT)

**Reference Point Definition:**

15cm below BeamIsocenter

**Irradiation Event UID:**

1.3.46.670589.28.961600801528.20140313164605636.1

**Dose Area Product:**

0.00014553492500 Gy.m2

**Dose (RP):**

0.00790174471992 Gy

**Positioner Primary Angle:**

-0.4 deg

**Positioner Secondary Angle:**

0.1 deg

**X-Ray Filters****X-Ray Filter Type:**

Strip filter (113650, DCM)

**X-Ray Filter Material:**

Copper or Copper compound (C-127F9, SRT)

**X-Ray Filter Thickness Minimum:**

0.4 mm

**X-Ray Filter Thickness Maximum:**

0.4 mm

**X-Ray Filters**

**X-Ray Filter Type:**

Strip filter (113650, DCM)

**X-Ray Filter Material:**

Aluminum or Aluminum compound (C-120F9, SRT)

**X-Ray Filter Thickness Minimum:**

1 mm

**X-Ray Filter Thickness Maximum:**

1 mm

**Fluoro Mode:**

Pulsed (113631, DCM)

**Pulse Rate:**

15 {pulse}/s

**Number of Pulses:**

318 1

**X-Ray Tube Current:**

116 mA

**Distance Source to Isocenter:**

810 mm

**KVP:**

104.56 kV

**Pulse Width:**

4 ms

**Irradiation Duration:**

21.199 s

**Patient Table Relationship:**

headfirst (F-10470, SRT)

**Patient Orientation:**

recumbent (F-10450, SRT)

Concept Modifier: Patient Orientation Modifier = supine (F-10340, SRT)

**Table Longitudinal Position:**

27.90000000000000 mm

**Table Lateral Position:**

1681.4 mm

**Table Head Tilt Angle:**

0 deg

**Table Cradle Tilt Angle:**

0 deg

**Target Region:**

Abdomen (T-D400, SRT)

**Number of Frames:**

318 1

**SubImages per Frame:**

1 1

**Wedges and Shutters****Bottom Shutter:**

92.5 mm

**Left Shutter:**

112 mm

**Right Shutter:**

112 mm

**Top Shutter:**

92.5 mm

**Beam Position****Longitudinal Beam Position:**

1168.000000000000 mm

**Beam Angle:**

0 deg

**Table Height Position:**

885 mm

**Irradiation Event X-Ray Data**

Concept Modifier: Acquisition Plane = Single Plane (113622, DCM)

**DateTime Started:**

2014-03-13 16:46:31

**Irradiation Event Type:**

Fluoroscopy (P5-06000, SRT)

**Reference Point Definition:**

15cm below BeamIsocenter

**Irradiation Event UID:**

1.3.46.670589.28.961600801528.20140313164630511.1

**Dose Area Product:**

7.3171185522E-05 Gy.m2

**Dose (RP):**

0.00384067952249 Gy

**Positioner Primary Angle:**

-0.4 deg

**Positioner Secondary Angle:**

0.1 deg

**X-Ray Filters****X-Ray Filter Type:**

Strip filter (113650, DCM)

**X-Ray Filter Material:**

Copper or Copper compound (C-127F9, SRT)

**X-Ray Filter Thickness Minimum:**

0.4 mm

**X-Ray Filter Thickness Maximum:**

0.4 mm

**X-Ray Filters**

**X-Ray Filter Type:**

Strip filter (113650, DCM)

**X-Ray Filter Material:**

Aluminum or Aluminum compound (C-120F9, SRT)

**X-Ray Filter Thickness Minimum:**

1 mm

**X-Ray Filter Thickness Maximum:**

1 mm

**Fluoro Mode:**

Pulsed (113631, DCM)

**Pulse Rate:**

15 {pulse}/s

**Number of Pulses:**

154 1

**X-Ray Tube Current:**

116.9 mA

**Distance Source to Isocenter:**

810 mm

**KVP:**

103.81 kV

**Pulse Width:**

4 ms

**Irradiation Duration:**

10.266 s

**Patient Table Relationship:**

headfirst (F-10470, SRT)

**Patient Orientation:**

recumbent (F-10450, SRT)

Concept Modifier: Patient Orientation Modifier = supine (F-10340, SRT)

**Table Longitudinal Position:**

27.90000000000000 mm

**Table Lateral Position:**

1681.4 mm

**Table Head Tilt Angle:**

0 deg

**Table Cradle Tilt Angle:**

0 deg

**Target Region:**

Abdomen (T-D400, SRT)

**Number of Frames:**

154 1

**SubImages per Frame:**

1 1

**Wedges and Shutters****Bottom Shutter:**

97.5 mm

**Left Shutter:**

112 mm

**Right Shutter:**

112 mm

**Top Shutter:**

97.5 mm

**Beam Position****Longitudinal Beam Position:**

1183 mm

**Beam Angle:**

0 deg

**Table Height Position:**

885 mm

**Irradiation Event X-Ray Data**

Concept Modifier: Acquisition Plane = Single Plane (113622, DCM)

**DateTime Started:**

2014-03-13 16:48:28

**Irradiation Event Type:**

Fluoroscopy (P5-06000, SRT)

**Reference Point Definition:**

15cm below BeamIsocenter

**Irradiation Event UID:**

1.3.46.670589.28.961600801528.20140313164827775.1

**Dose Area Product:**

0.00039161580173 Gy.m2

**Dose (RP):**

0.02042470156106 Gy

**Positioner Primary Angle:**

-0.4 deg

**Positioner Secondary Angle:**

0.1 deg

**X-Ray Filters****X-Ray Filter Type:**

Strip filter (113650, DCM)

**X-Ray Filter Material:**

Copper or Copper compound (C-127F9, SRT)

**X-Ray Filter Thickness Minimum:**

0.4 mm

**X-Ray Filter Thickness Maximum:**

0.4 mm

**X-Ray Filters**



**X-Ray Filter Type:**

Strip filter (113650, DCM)

**X-Ray Filter Material:**

Aluminum or Aluminum compound (C-120F9, SRT)

**X-Ray Filter Thickness Minimum:**

1 mm

**X-Ray Filter Thickness Maximum:**

1 mm

**Fluoro Mode:**

Pulsed (113631, DCM)

**Pulse Rate:**

15 {pulse}/s

**Number of Pulses:**

818 1

**X-Ray Tube Current:**

115.7 mA

**Distance Source to Isocenter:**

810 mm

**KVP:**

104.86 kV

**Pulse Width:**

4 ms

**Irradiation Duration:**

54.533 s

**Patient Table Relationship:**

headfirst (F-10470, SRT)

**Patient Orientation:**

recumbent (F-10450, SRT)

Concept Modifier: Patient Orientation Modifier = supine (F-10340, SRT)

**Table Longitudinal Position:**

27.9000000000000 mm

**Table Lateral Position:**

1681.4 mm

**Table Head Tilt Angle:**

0 deg

**Table Cradle Tilt Angle:**

0 deg

**Target Region:**

Abdomen (T-D400, SRT)

**Number of Frames:**

818 1

**SubImages per Frame:**

1 1

**Wedges and Shutters****Bottom Shutter:**

97.5 mm

**Left Shutter:**

112 mm

**Right Shutter:**

112 mm

**Top Shutter:**

97.5 mm

**Beam Position****Longitudinal Beam Position:**

1183 mm

**Beam Angle:**

0 deg

**Table Height Position:**

885 mm

**Irradiation Event X-Ray Data**

Concept Modifier: Acquisition Plane = Single Plane (113622, DCM)

**Date Time Started:**

2014-03-13 16:51:34

**Irradiation Event Type:**

Fluoroscopy (P5-06000, SRT)

**Reference Point Definition:**

15cm below BeamIsocenter

**Irradiation Event UID:**

1.3.46.670589.28.961600801528.20140313165134352.1

**Dose Area Product:**

0.00035924404555 Gy.m2

**Dose (RP):**

0.01868227731864 Gy

**Positioner Primary Angle:**

-0.4 deg

**Positioner Secondary Angle:**

0.1 deg

**X-Ray Filters****X-Ray Filter Type:**

Strip filter (113650, DCM)

**X-Ray Filter Material:**

Copper or Copper compound (C-127F9, SRT)

**X-Ray Filter Thickness Minimum:**

0.4 mm

**X-Ray Filter Thickness Maximum:**

0.4 mm

**X-Ray Filters**

**X-Ray Filter Type:**

Strip filter (113650, DCM)

**X-Ray Filter Material:**

Aluminum or Aluminum compound (C-120F9, SRT)

**X-Ray Filter Thickness Minimum:**

1 mm

**X-Ray Filter Thickness Maximum:**

1 mm

**Fluoro Mode:**

Pulsed (113631, DCM)

**Pulse Rate:**

15 {pulse}/s

**Number of Pulses:**

742 1

**X-Ray Tube Current:**

116.3 mA

**Distance Source to Isocenter:**

810 mm

**KVP:**

104.36 kV

**Pulse Width:**

4 ms

**Irradiation Duration:**

49.466 s

**Patient Table Relationship:**

headfirst (F-10470, SRT)

**Patient Orientation:**

recumbent (F-10450, SRT)

Concept Modifier: Patient Orientation Modifier = supine (F-10340, SRT)

**Table Longitudinal Position:**

27.9000000000000 mm

**Table Lateral Position:**

1681.4 mm

**Table Head Tilt Angle:**

0 deg

**Table Cradle Tilt Angle:**

0 deg

**Target Region:**

Abdomen (T-D400, SRT)

**Number of Frames:**

742 1

**SubImages per Frame:**

1 1

**Wedges and Shutters****Bottom Shutter:**

97.5 mm

**Left Shutter:**

112 mm

**Right Shutter:**

112 mm

**Top Shutter:**

97.5 mm

**Beam Position****Longitudinal Beam Position:**

1183 mm

**Beam Angle:**

0 deg

**Table Height Position:**

885 mm

**Irradiation Event X-Ray Data**

Concept Modifier: Acquisition Plane = Single Plane (113622, DCM)

**DateTime Started:**

2014-03-13 16:52:32

**Irradiation Event Type:**

Fluoroscopy (P5-06000, SRT)

**Reference Point Definition:**

15cm below BeamIsocenter

**Irradiation Event UID:**

1.3.46.670589.28.961600801528.20140313165231914.1

**Dose Area Product:**

0.00011783228964 Gy.m2

**Dose (RP):**

0.00616850321395 Gy

**Positioner Primary Angle:**

-0.4 deg

**Positioner Secondary Angle:**

0.1 deg

**X-Ray Filters****X-Ray Filter Type:**

Strip filter (113650, DCM)

**X-Ray Filter Material:**

Copper or Copper compound (C-127F9, SRT)

**X-Ray Filter Thickness Minimum:**

0.4 mm

**X-Ray Filter Thickness Maximum:**

0.4 mm

**X-Ray Filters**

**X-Ray Filter Type:**

Strip filter (113650, DCM)

**X-Ray Filter Material:**

Aluminum or Aluminum compound (C-120F9, SRT)

**X-Ray Filter Thickness Minimum:**

1 mm

**X-Ray Filter Thickness Maximum:**

1 mm

**Fluoro Mode:**

Pulsed (113631, DCM)

**Pulse Rate:**

15 {pulse}/s

**Number of Pulses:**

244 1

**X-Ray Tube Current:**

115.5 mA

**Distance Source to Isocenter:**

810 mm

**KVP:**

105.01 kV

**Pulse Width:**

4 ms

**Irradiation Duration:**

16.266 s

**Patient Table Relationship:**

headfirst (F-10470, SRT)

**Patient Orientation:**

recumbent (F-10450, SRT)

Concept Modifier: Patient Orientation Modifier = supine (F-10340, SRT)

**Table Longitudinal Position:**

27.90000000000000 mm

**Table Lateral Position:**

1681.4 mm

**Table Head Tilt Angle:**

0 deg

**Table Cradle Tilt Angle:**

0 deg

**Target Region:**

Abdomen (T-D400, SRT)

**Number of Frames:**

244 1

**SubImages per Frame:**

1 1

**Wedges and Shutters****Bottom Shutter:**

97.5 mm

**Left Shutter:**

112 mm

**Right Shutter:**

112 mm

**Top Shutter:**

97.5 mm

**Beam Position****Longitudinal Beam Position:**

1183 mm

**Beam Angle:**

0 deg

**Table Height Position:**

885 mm

**Irradiation Event X-Ray Data**

Concept Modifier: Acquisition Plane = Single Plane (113622, DCM)

**DateTime Started:**

2014-03-13 16:53:39

**Irradiation Event Type:**

Fluoroscopy (P5-06000, SRT)

**Reference Point Definition:**

15cm below BeamIsocenter

**Irradiation Event UID:**

1.3.46.670589.28.961600801528.20140313165339133.1

**Dose Area Product:**

0.00017356278739 Gy.m2

**Dose (RP):**

0.00905417814508 Gy

**Positioner Primary Angle:**

-0.4 deg

**Positioner Secondary Angle:**

0.1 deg

**X-Ray Filters****X-Ray Filter Type:**

Strip filter (113650, DCM)

**X-Ray Filter Material:**

Copper or Copper compound (C-127F9, SRT)

**X-Ray Filter Thickness Minimum:**

0.4 mm

**X-Ray Filter Thickness Maximum:**

0.4 mm

**X-Ray Filters**

**X-Ray Filter Type:**

Strip filter (113650, DCM)

**X-Ray Filter Material:**

Aluminum or Aluminum compound (C-120F9, SRT)

**X-Ray Filter Thickness Minimum:**

1 mm

**X-Ray Filter Thickness Maximum:**

1 mm

**Fluoro Mode:**

Pulsed (113631, DCM)

**Pulse Rate:**

15 {pulse}/s

**Number of Pulses:**

352 1

**X-Ray Tube Current:**

115.1 mA

**Distance Source to Isocenter:**

810 mm

**KVP:**

105.42 kV

**Pulse Width:**

4 ms

**Irradiation Duration:**

23.466 s

**Patient Table Relationship:**

headfirst (F-10470, SRT)

**Patient Orientation:**

recumbent (F-10450, SRT)

Concept Modifier: Patient Orientation Modifier = supine (F-10340, SRT)

**Table Longitudinal Position:**

27.9000000000000 mm

**Table Lateral Position:**

1681.4 mm

**Table Head Tilt Angle:**

0 deg

**Table Cradle Tilt Angle:**

0 deg

**Target Region:**

Abdomen (T-D400, SRT)

**Number of Frames:**

352 1

**SubImages per Frame:**

1 1

**Wedges and Shutters****Bottom Shutter:**

97.5 mm

**Left Shutter:**

112 mm

**Right Shutter:**

112 mm

**Top Shutter:**

97.5 mm

**Beam Position****Longitudinal Beam Position:**

1183 mm

**Beam Angle:**

0 deg

**Table Height Position:**

885 mm

**Irradiation Event X-Ray Data**

Concept Modifier: Acquisition Plane = Single Plane (113622, DCM)

**DateTime Started:**

2014-03-13 16:54:37

**Irradiation Event Type:**

Fluoroscopy (P5-06000, SRT)

**Reference Point Definition:**

15cm below BeamIsocenter

**Irradiation Event UID:**

1.3.46.670589.28.961600801528.20140313165436726.1

**Dose Area Product:**

0.00016843916819 Gy.m2

**Dose (RP):**

0.00876492194674 Gy

**Positioner Primary Angle:**

-0.4 deg

**Positioner Secondary Angle:**

0.1 deg

**X-Ray Filters****X-Ray Filter Type:**

Strip filter (113650, DCM)

**X-Ray Filter Material:**

Copper or Copper compound (C-127F9, SRT)

**X-Ray Filter Thickness Minimum:**

0.4 mm

**X-Ray Filter Thickness Maximum:**

0.4 mm

**X-Ray Filters**



**X-Ray Filter Type:**

Strip filter (113650, DCM)

**X-Ray Filter Material:**

Aluminum or Aluminum compound (C-120F9, SRT)

**X-Ray Filter Thickness Minimum:**

1 mm

**X-Ray Filter Thickness Maximum:**

1 mm

**Fluoro Mode:**

Pulsed (113631, DCM)

**Pulse Rate:**

15 {pulse}/s

**Number of Pulses:**

342 1

**X-Ray Tube Current:**

115.1 mA

**Distance Source to Isocenter:**

810 mm

**KVP:**

105.42 kV

**Pulse Width:**

4 ms

**Irradiation Duration:**

22.799 s

**Patient Table Relationship:**

headfirst (F-10470, SRT)

**Patient Orientation:**

recumbent (F-10450, SRT)

Concept Modifier: Patient Orientation Modifier = supine (F-10340, SRT)

**Table Longitudinal Position:**

27.90000000000000 mm

**Table Lateral Position:**

1681.4 mm

**Table Head Tilt Angle:**

0 deg

**Table Cradle Tilt Angle:**

0 deg

**Target Region:**

Abdomen (T-D400, SRT)

**Number of Frames:**

342 1

**SubImages per Frame:**

1 1

**Wedges and Shutters****Bottom Shutter:**

97.5 mm

**Left Shutter:**

112 mm

**Right Shutter:**

112 mm

**Top Shutter:**

97.5 mm

**Beam Position****Longitudinal Beam Position:**

1183 mm

**Beam Angle:**

0 deg

**Table Height Position:**

885 mm

**Irradiation Event X-Ray Data**

Concept Modifier: Acquisition Plane = Single Plane (113622, DCM)

**DateTime Started:**

2014-03-13 16:55:14

**Irradiation Event Type:**

Fluoroscopy (P5-06000, SRT)

**Reference Point Definition:**

15cm below BeamIsocenter

**Irradiation Event UID:**

1.3.46.670589.28.961600801528.20140313165514038.1

**Dose Area Product:**

9.2745609440E-05 Gy.m2

**Dose (RP):**

0.00483241505968 Gy

**Positioner Primary Angle:**

-0.4 deg

**Positioner Secondary Angle:**

0.1 deg

**X-Ray Filters****X-Ray Filter Type:**

Strip filter (113650, DCM)

**X-Ray Filter Material:**

Copper or Copper compound (C-127F9, SRT)

**X-Ray Filter Thickness Minimum:**

0.4 mm

**X-Ray Filter Thickness Maximum:**

0.4 mm

**X-Ray Filters**

**X-Ray Filter Type:**

Strip filter (113650, DCM)

**X-Ray Filter Material:**

Aluminum or Aluminum compound (C-120F9, SRT)

**X-Ray Filter Thickness Minimum:**

1 mm

**X-Ray Filter Thickness Maximum:**

1 mm

**Fluoro Mode:**

Pulsed (113631, DCM)

**Pulse Rate:**

15 {pulse}/s

**Number of Pulses:**

188 1

**X-Ray Tube Current:**

115 mA

**Distance Source to Isocenter:**

810 mm

**KVP:**

105.47 kV

**Pulse Width:**

4 ms

**Irradiation Duration:**

12.533 s

**Patient Table Relationship:**

headfirst (F-10470, SRT)

**Patient Orientation:**

recumbent (F-10450, SRT)

Concept Modifier: Patient Orientation Modifier = supine (F-10340, SRT)

**Table Longitudinal Position:**

27.9000000000000 mm

**Table Lateral Position:**

1681.4 mm

**Table Head Tilt Angle:**

0 deg

**Table Cradle Tilt Angle:**

0 deg

**Target Region:**

Abdomen (T-D400, SRT)

**Number of Frames:**

188 1

**SubImages per Frame:**

1 1

**Wedges and Shutters****Bottom Shutter:**

97.5 mm

**Left Shutter:**

112 mm

**Right Shutter:**

112 mm

**Top Shutter:**

97.5 mm

**Beam Position****Longitudinal Beam Position:**

1183 mm

**Beam Angle:**

0 deg

**Table Height Position:**

885 mm

**Irradiation Event X-Ray Data**

Concept Modifier: Acquisition Plane = Single Plane (113622, DCM)

**Date Time Started:**

2014-03-13 16:55:43

**Irradiation Event Type:**

Fluoroscopy (P5-06000, SRT)

**Reference Point Definition:**

15cm below BeamIsocenter

**Irradiation Event UID:**

1.3.46.670589.28.961600801528.20140313165543007.1

**Dose Area Product:**

0.00018509501404 Gy.m2

**Dose (RP):**

0.00957759412304 Gy

**Positioner Primary Angle:**

-0.4 deg

**Positioner Secondary Angle:**

0.1 deg

**X-Ray Filters****X-Ray Filter Type:**

Strip filter (113650, DCM)

**X-Ray Filter Material:**

Copper or Copper compound (C-127F9, SRT)

**X-Ray Filter Thickness Minimum:**

0.4 mm

**X-Ray Filter Thickness Maximum:**

0.4 mm

**X-Ray Filters**

**X-Ray Filter Type:**

Strip filter (113650, DCM)

**X-Ray Filter Material:**

Aluminum or Aluminum compound (C-120F9, SRT)

**X-Ray Filter Thickness Minimum:**

1 mm

**X-Ray Filter Thickness Maximum:**

1 mm

**Fluoro Mode:**

Pulsed (113631, DCM)

**Pulse Rate:**

15 {pulse}/s

**Number of Pulses:**

380 1

**X-Ray Tube Current:**

116.8 mA

**Distance Source to Isocenter:**

810 mm

**KVP:**

103.91 kV

**Pulse Width:**

4 ms

**Irradiation Duration:**

25.333 s

**Patient Table Relationship:**

headfirst (F-10470, SRT)

**Patient Orientation:**

recumbent (F-10450, SRT)

Concept Modifier: Patient Orientation Modifier = supine (F-10340, SRT)

**Table Longitudinal Position:**

27.90000000000000 mm

**Table Lateral Position:**

1681.4 mm

**Table Head Tilt Angle:**

0 deg

**Table Cradle Tilt Angle:**

0 deg

**Target Region:**

Abdomen (T-D400, SRT)

**Number of Frames:**

380 1

**SubImages per Frame:**

1 1

**Wedges and Shutters****Bottom Shutter:**

97.5 mm

**Left Shutter:**

112 mm

**Right Shutter:**

112 mm

**Top Shutter:**

97.5 mm

**Beam Position****Longitudinal Beam Position:**

1183 mm

**Beam Angle:**

0 deg

**Table Height Position:**

885 mm

**Irradiation Event X-Ray Data**

Concept Modifier: Acquisition Plane = Single Plane (113622, DCM)

**DateTime Started:**

2014-03-13 16:56:24

**Irradiation Event Type:**

Fluoroscopy (P5-06000, SRT)

**Reference Point Definition:**

15cm below BeamIsocenter

**Irradiation Event UID:**

1.3.46.670589.28.961600801528.20140313165623897.1

**Dose Area Product:**

0.00033025826302 Gy.m2

**Dose (RP):**

0.01725206611570 Gy

**Positioner Primary Angle:**

-0.4 deg

**Positioner Secondary Angle:**

0.1 deg

**X-Ray Filters****X-Ray Filter Type:**

Strip filter (113650, DCM)

**X-Ray Filter Material:**

Copper or Copper compound (C-127F9, SRT)

**X-Ray Filter Thickness Minimum:**

0.4 mm

**X-Ray Filter Thickness Maximum:**

0.4 mm

**X-Ray Filters**

**X-Ray Filter Type:**

Strip filter (113650, DCM)

**X-Ray Filter Material:**

Aluminum or Aluminum compound (C-120F9, SRT)

**X-Ray Filter Thickness Minimum:**

1 mm

**X-Ray Filter Thickness Maximum:**

1 mm

**Fluoro Mode:**

Pulsed (113631, DCM)

**Pulse Rate:**

15 {pulse}/s

**Number of Pulses:**

696 1

**X-Ray Tube Current:**

116.4 mA

**Distance Source to Isocenter:**

810 mm

**KVP:**

104.21 kV

**Pulse Width:**

4 ms

**Irradiation Duration:**

46.4 s

**Patient Table Relationship:**

headfirst (F-10470, SRT)

**Patient Orientation:**

recumbent (F-10450, SRT)

Concept Modifier: Patient Orientation Modifier = supine (F-10340, SRT)

**Table Longitudinal Position:**

44.90000000000000 mm

**Table Lateral Position:**

1681.4 mm

**Table Head Tilt Angle:**

0 deg

**Table Cradle Tilt Angle:**

0 deg

**Target Region:**

Abdomen (T-D400, SRT)

**Number of Frames:**

696 1

**SubImages per Frame:**

1 1

**Wedges and Shutters****Bottom Shutter:**

97.5 mm

**Left Shutter:**

112 mm

**Right Shutter:**

112 mm

**Top Shutter:**

97.5 mm

**Beam Position****Longitudinal Beam Position:**

1183 mm

**Beam Angle:**

0 deg

**Table Height Position:**

885 mm

**Irradiation Event X-Ray Data**

Concept Modifier: Acquisition Plane = Single Plane (113622, DCM)

**DateTime Started:**

2014-03-13 16:57:30

**Irradiation Event Type:**

Fluoroscopy (P5-06000, SRT)

**Reference Point Definition:**

15cm below BeamIsocenter

**Irradiation Event UID:**

1.3.46.670589.28.961600801528.20140313165729350.1

**Dose Area Product:**

0.00031755732475 Gy.m2

**Dose (RP):**

0.01679981634527 Gy

**Positioner Primary Angle:**

-0.4 deg

**Positioner Secondary Angle:**

0.1 deg

**X-Ray Filters****X-Ray Filter Type:**

Strip filter (113650, DCM)

**X-Ray Filter Material:**

Copper or Copper compound (C-127F9, SRT)

**X-Ray Filter Thickness Minimum:**

0.4 mm

**X-Ray Filter Thickness Maximum:**

0.4 mm

**X-Ray Filters**



**X-Ray Filter Type:**

Strip filter (113650, DCM)

**X-Ray Filter Material:**

Aluminum or Aluminum compound (C-120F9, SRT)

**X-Ray Filter Thickness Minimum:**

1 mm

**X-Ray Filter Thickness Maximum:**

1 mm

**Fluoro Mode:**

Pulsed (113631, DCM)

**Pulse Rate:**

15 {pulse}/s

**Number of Pulses:**

672 1

**X-Ray Tube Current:**

117.1 mA

**Distance Source to Isocenter:**

810 mm

**KVP:**

103.62 kV

**Pulse Width:**

4 ms

**Irradiation Duration:**

44.8 s

**Patient Table Relationship:**

headfirst (F-10470, SRT)

**Patient Orientation:**

recumbent (F-10450, SRT)

Concept Modifier: Patient Orientation Modifier = supine (F-10340, SRT)

**Table Longitudinal Position:**

44.90000000000000 mm

**Table Lateral Position:**

1681.4 mm

**Table Head Tilt Angle:**

0 deg

**Table Cradle Tilt Angle:**

0 deg

**Target Region:**

Abdomen (T-D400, SRT)

**Number of Frames:**

672 1

**SubImages per Frame:**

1 1

**Wedges and Shutters****Bottom Shutter:**

97.5 mm

**Left Shutter:**

112 mm

**Right Shutter:**

112 mm

**Top Shutter:**

97.5 mm

**Beam Position****Longitudinal Beam Position:**

1183 mm

**Beam Angle:**

0 deg

**Table Height Position:**

885 mm

**Irradiation Event X-Ray Data**

Concept Modifier: Acquisition Plane = Single Plane (113622, DCM)

**DateTime Started:**

2014-03-13 16:58:30

**Irradiation Event Type:**

Fluoroscopy (P5-06000, SRT)

**Reference Point Definition:**

15cm below BeamIsocenter

**Irradiation Event UID:**

1.3.46.670589.28.961600801528.20140313165830068.1

**Dose Area Product:**

0.00019444579050 Gy.m2

**Dose (RP):**

0.01034664830119 Gy

**Positioner Primary Angle:**

-0.4 deg

**Positioner Secondary Angle:**

0.1 deg

**X-Ray Filters****X-Ray Filter Type:**

Strip filter (113650, DCM)

**X-Ray Filter Material:**

Copper or Copper compound (C-127F9, SRT)

**X-Ray Filter Thickness Minimum:**

0.4 mm

**X-Ray Filter Thickness Maximum:**

0.4 mm

**X-Ray Filters**

**X-Ray Filter Type:**

Strip filter (113650, DCM)

**X-Ray Filter Material:**

Aluminum or Aluminum compound (C-120F9, SRT)

**X-Ray Filter Thickness Minimum:**

1 mm

**X-Ray Filter Thickness Maximum:**

1 mm

**Fluoro Mode:**

Pulsed (113631, DCM)

**Pulse Rate:**

15 {pulse}/s

**Number of Pulses:**

415 1

**X-Ray Tube Current:**

116.4 mA

**Distance Source to Isocenter:**

810 mm

**KVP:**

104.26 kV

**Pulse Width:**

4 ms

**Irradiation Duration:**

27.666 s

**Patient Table Relationship:**

headfirst (F-10470, SRT)

**Patient Orientation:**

recumbent (F-10450, SRT)

Concept Modifier: Patient Orientation Modifier = supine (F-10340, SRT)

**Table Longitudinal Position:**

44.90000000000000 mm

**Table Lateral Position:**

1681.4 mm

**Table Head Tilt Angle:**

0 deg

**Table Cradle Tilt Angle:**

0 deg

**Target Region:**

Abdomen (T-D400, SRT)

**Number of Frames:**

415 1

**SubImages per Frame:**

1 1

**Wedges and Shutters****Bottom Shutter:**

97.5 mm

**Left Shutter:**

112 mm

**Right Shutter:**

112 mm

**Top Shutter:**

97.5 mm

**Beam Position****Longitudinal Beam Position:**

1183 mm

**Beam Angle:**

0 deg

**Table Height Position:**

885 mm

**Irradiation Event X-Ray Data**

Concept Modifier: Acquisition Plane = Single Plane (113622, DCM)

**DateTime Started:**

2014-03-13 16:59:20

**Irradiation Event Type:**

Fluoroscopy (P5-06000, SRT)

**Reference Point Definition:**

15cm below BeamIsocenter

**Irradiation Event UID:**

1.3.46.670589.28.961600801528.20140313165919615.1

**Dose Area Product:**

0.00011892649541 Gy.m2

**Dose (RP):**

0.00617079889807 Gy

**Positioner Primary Angle:**

-0.4 deg

**Positioner Secondary Angle:**

0.1 deg

**X-Ray Filters****X-Ray Filter Type:**

Strip filter (113650, DCM)

**X-Ray Filter Material:**

Copper or Copper compound (C-127F9, SRT)

**X-Ray Filter Thickness Minimum:**

0.4 mm

**X-Ray Filter Thickness Maximum:**

0.4 mm

**X-Ray Filters**

**X-Ray Filter Type:**

Strip filter (113650, DCM)

**X-Ray Filter Material:**

Aluminum or Aluminum compound (C-120F9, SRT)

**X-Ray Filter Thickness Minimum:**

1 mm

**X-Ray Filter Thickness Maximum:**

1 mm

**Fluoro Mode:**

Pulsed (113631, DCM)

**Pulse Rate:**

15 {pulse}/s

**Number of Pulses:**

246 1

**X-Ray Tube Current:**

116.3 mA

**Distance Source to Isocenter:**

810 mm

**KVP:**

104.31 kV

**Pulse Width:**

4 ms

**Irradiation Duration:**

16.399 s

**Patient Table Relationship:**

headfirst (F-10470, SRT)

**Patient Orientation:**

recumbent (F-10450, SRT)

Concept Modifier: Patient Orientation Modifier = supine (F-10340, SRT)

**Table Longitudinal Position:**

44.90000000000000 mm

**Table Lateral Position:**

1681.4 mm

**Table Head Tilt Angle:**

0 deg

**Table Cradle Tilt Angle:**

0 deg

**Target Region:**

Abdomen (T-D400, SRT)

**Number of Frames:**

246 1

**SubImages per Frame:**

1 1

**Wedges and Shutters****Bottom Shutter:**

97.5 mm

**Left Shutter:**

112 mm

**Right Shutter:**

112 mm

**Top Shutter:**

97.5 mm

**Beam Position****Longitudinal Beam Position:**

1183 mm

**Beam Angle:**

0 deg

**Table Height Position:**

885 mm

**Irradiation Event X-Ray Data**

Concept Modifier: Acquisition Plane = Single Plane (113622, DCM)

**DateTime Started:**

2014-03-13 16:59:51

**Irradiation Event Type:**

Fluoroscopy (P5-06000, SRT)

**Reference Point Definition:**

15cm below BeamIsocenter

**Irradiation Event UID:**

1.3.46.670589.28.961600801528.20140313165950959.1

**Dose Area Product:**

0.00028102149479 Gy.m2

**Dose (RP):**

0.01461432506887 Gy

**Positioner Primary Angle:**

-0.4 deg

**Positioner Secondary Angle:**

0.1 deg

**X-Ray Filters****X-Ray Filter Type:**

Strip filter (113650, DCM)

**X-Ray Filter Material:**

Copper or Copper compound (C-127F9, SRT)

**X-Ray Filter Thickness Minimum:**

0.4 mm

**X-Ray Filter Thickness Maximum:**

0.4 mm

**X-Ray Filters**

**X-Ray Filter Type:**

Strip filter (113650, DCM)

**X-Ray Filter Material:**

Aluminum or Aluminum compound (C-120F9, SRT)

**X-Ray Filter Thickness Minimum:**

1 mm

**X-Ray Filter Thickness Maximum:**

1 mm

**Fluoro Mode:**

Pulsed (113631, DCM)

**Pulse Rate:**

15 {pulse}/s

**Number of Pulses:**

593 1

**X-Ray Tube Current:**

116.9 mA

**Distance Source to Isocenter:**

810 mm

**KVP:**

103.81 kV

**Pulse Width:**

4 ms

**Irradiation Duration:**

39.533 s

**Patient Table Relationship:**

headfirst (F-10470, SRT)

**Patient Orientation:**

recumbent (F-10450, SRT)

Concept Modifier: Patient Orientation Modifier = supine (F-10340, SRT)

**Table Longitudinal Position:**

44.90000000000000 mm

**Table Lateral Position:**

1681.4 mm

**Table Head Tilt Angle:**

0 deg

**Table Cradle Tilt Angle:**

0 deg

**Target Region:**

Abdomen (T-D400, SRT)

**Number of Frames:**

593 1

**SubImages per Frame:**

1 1

**Wedges and Shutters****Bottom Shutter:**

97.5 mm

**Left Shutter:**

112 mm

**Right Shutter:**

112 mm

**Top Shutter:**

97.5 mm

**Beam Position****Longitudinal Beam Position:**

1183 mm

**Beam Angle:**

0 deg

**Table Height Position:**

885 mm

**Irradiation Event X-Ray Data**

Concept Modifier: Acquisition Plane = Single Plane (113622, DCM)

**DateTime Started:**

2014-03-13 17:00:40

**Irradiation Event Type:**

Fluoroscopy (P5-06000, SRT)

**Reference Point Definition:**

15cm below BeamIsocenter

**Irradiation Event UID:**

1.3.46.670589.28.961600801528.20140313170040021.1

**Dose Area Product:**

1.8486233884E-05 Gy.m2

**Dose (RP):**

0.00097566574839 Gy

**Positioner Primary Angle:**

-0.4 deg

**Positioner Secondary Angle:**

0.1 deg

**X-Ray Filters****X-Ray Filter Type:**

Strip filter (113650, DCM)

**X-Ray Filter Material:**

Copper or Copper compound (C-127F9, SRT)

**X-Ray Filter Thickness Minimum:**

0.4 mm

**X-Ray Filter Thickness Maximum:**

0.4 mm

**X-Ray Filters**



**X-Ray Filter Type:**

Strip filter (113650, DCM)

**X-Ray Filter Material:**

Aluminum or Aluminum compound (C-120F9, SRT)

**X-Ray Filter Thickness Minimum:**

1 mm

**X-Ray Filter Thickness Maximum:**

1 mm

**Fluoro Mode:**

Pulsed (113631, DCM)

**Pulse Rate:**

15 {pulse}/s

**Number of Pulses:**

39 1

**X-Ray Tube Current:**

116.4 mA

**Distance Source to Isocenter:**

810 mm

**KVP:**

104.21 kV

**Pulse Width:**

4 ms

**Irradiation Duration:**

2.6 s

**Patient Table Relationship:**

headfirst (F-10470, SRT)

**Patient Orientation:**

recumbent (F-10450, SRT)

Concept Modifier: Patient Orientation Modifier = supine (F-10340, SRT)

**Table Longitudinal Position:**

44.90000000000000 mm

**Table Lateral Position:**

1681.4 mm

**Table Head Tilt Angle:**

0 deg

**Table Cradle Tilt Angle:**

0 deg

**Target Region:**

Abdomen (T-D400, SRT)

**Number of Frames:**

39 1

**SubImages per Frame:**

1 1

**Wedges and Shutters****Bottom Shutter:**

97.5 mm

**Left Shutter:**

112 mm

**Right Shutter:**

112 mm

**Top Shutter:**

97.5 mm

**Beam Position****Longitudinal Beam Position:**

1183 mm

**Beam Angle:**

0 deg

**Table Height Position:**

885 mm

**Irradiation Event X-Ray Data**

Concept Modifier: Acquisition Plane = Single Plane (113622, DCM)

**DateTime Started:**

2014-03-13 17:00:44

**Irradiation Event Type:**

Stationary Acquisition (113611, DCM)

**Reference Point Definition:**

15cm below BeamIsocenter

**Acquired Image:**

[XA image](#)

**Irradiation Event UID:**

1.3.46.670589.28.961600801528.20140313170044083.1

**Dose Area Product:**

4.3410522675E-05 Gy.m2

**Dose (RP):**

0.00234159779614 Gy

**Positioner Primary Angle:**

-0.4 deg

**Positioner Secondary Angle:**

0.1 deg

**X-Ray Filters****X-Ray Filter Type:**

Strip filter (113650, DCM)

**X-Ray Filter Material:**

Copper or Copper compound (C-127F9, SRT)

**X-Ray Filter Thickness Minimum:**

0.1 mm

**X-Ray Filter Thickness Maximum:**

0.1 mm

## **X-Ray Filters**

**X-Ray Filter Type:**

Strip filter (113650, DCM)

**X-Ray Filter Material:**

Aluminum or Aluminum compound (C-120F9, SRT)

**X-Ray Filter Thickness Minimum:**

1 mm

**X-Ray Filter Thickness Maximum:**

1 mm

**X-Ray Tube Current:**

483.8 mA

**Distance Source to Isocenter:**

810 mm

**KVP:**

80 kV

**Pulse Width:**

87 ms

**Distance Source to Detector:**

1040 mm

**Irradiation Duration:**

0.087 s

**Patient Table Relationship:**

headfirst (F-10470, SRT)

**Patient Orientation:**

recumbent (F-10450, SRT)

Concept Modifier: Patient Orientation Modifier = supine (F-10340, SRT)

**Table Longitudinal Position:**

44.9000000000000 mm

**Table Lateral Position:**

1681.4 mm

**Table Head Tilt Angle:**

0 deg

**Table Cradle Tilt Angle:**

0 deg

**Target Region:**

Abdomen (T-D400, SRT)

**Number of Frames:**

1 1

**SubImages per Frame:**

1 1

## **Wedges and Shutters**

**Bottom Shutter:**

97.5 mm

**Left Shutter:**

112 mm

**Right Shutter:**

112 mm

**Top Shutter:**

97.5 mm

**Beam Position****Longitudinal Beam Position:**

1183 mm

**Beam Angle:**

0 deg

**Table Height Position:**

885 mm

**Irradiation Event X-Ray Data**

Concept Modifier: Acquisition Plane = Single Plane (113622, DCM)

**DateTime Started:**

2014-03-13 17:00:47

**Irradiation Event Type:**

Fluoroscopy (P5-06000, SRT)

**Reference Point Definition:**

15cm below BeamIsocenter

**Irradiation Event UID:**

1.3.46.670589.28.961600801528.20140313170047474.1

**Dose Area Product:**

0 Gy.m2

**Dose (RP):**

2.7548209366E-05 Gy

**Positioner Primary Angle:**

-0.4 deg

**Positioner Secondary Angle:**

0.1 deg

**X-Ray Filters****X-Ray Filter Type:**

Strip filter (113650, DCM)

**X-Ray Filter Material:**

Copper or Copper compound (C-127F9, SRT)

**X-Ray Filter Thickness Minimum:**

0.4 mm

**X-Ray Filter Thickness Maximum:**

0.4 mm

**X-Ray Filters****X-Ray Filter Type:**

Strip filter (113650, DCM)

**X-Ray Filter Material:**

Aluminum or Aluminum compound (C-120F9, SRT)

**X-Ray Filter Thickness Minimum:**

1 mm

**X-Ray Filter Thickness Maximum:**

1 mm

**Fluoro Mode:**

Pulsed (113631, DCM)

**Pulse Rate:**

15 {pulse}/s

**Number of Pulses:**

1 1

**X-Ray Tube Current:**

116.4 mA

**Distance Source to Isocenter:**

810 mm

**KVP:**

104.21 kV

**Pulse Width:**

4 ms

**Irradiation Duration:**

0.004 s

**Patient Table Relationship:**

headfirst (F-10470, SRT)

**Patient Orientation:**

recumbent (F-10450, SRT)

Concept Modifier: Patient Orientation Modifier = supine (F-10340, SRT)

**Table Longitudinal Position:**

44.9000000000000 mm

**Table Lateral Position:**

1681.4 mm

**Table Head Tilt Angle:**

0 deg

**Table Cradle Tilt Angle:**

0 deg

**Target Region:**

Abdomen (T-D400, SRT)

**Number of Frames:**

1 1

**SubImages per Frame:**

1 1

**Wedges and Shutters**

**Bottom Shutter:**

97.5 mm

**Left Shutter:**

112 mm

**Right Shutter:**

112 mm

**Top Shutter:**

97.5 mm

## Beam Position

**Longitudinal Beam Position:**

1183 mm

**Beam Angle:**

0 deg

**Table Height Position:**

885 mm

## Irradiation Event X-Ray Data

Concept Modifier: Acquisition Plane = Single Plane (113622, DCM)

**DateTime Started:**

2014-03-13 17:00:49

**Irradiation Event Type:**

Fluoroscopy (P5-06000, SRT)

**Reference Point Definition:**

15cm below BeamIsocenter

**Irradiation Event UID:**

1.3.46.670589.28.961600801528.20140313170048489.1

**Dose Area Product:**

5.2653151625E-05 Gy.m2

**Dose (RP):**

0.00170339761248 Gy

**Positioner Primary Angle:**

-0.4 deg

**Positioner Secondary Angle:**

0.1 deg

## X-Ray Filters

**X-Ray Filter Type:**

Strip filter (113650, DCM)

**X-Ray Filter Material:**

Copper or Copper compound (C-127F9, SRT)

**X-Ray Filter Thickness Minimum:**

0.4 mm

**X-Ray Filter Thickness Maximum:**

0.4 mm

## X-Ray Filters

**X-Ray Filter Type:**

Strip filter (113650, DCM)

**X-Ray Filter Material:**

Aluminum or Aluminum compound (C-120F9, SRT)

**X-Ray Filter Thickness Minimum:**

1 mm

**X-Ray Filter Thickness Maximum:**

1 mm

**Fluoro Mode:**

Pulsed (113631, DCM)

**Pulse Rate:**

15 {pulse}/s

**Number of Pulses:**

81 1

**X-Ray Tube Current:**

125.2 mA

**Distance Source to Isocenter:**

810 mm

**KVP:**

95.89 kV

**Pulse Width:**

4 ms

**Irradiation Duration:**

5.4 s

**Patient Table Relationship:**

headfirst (F-10470, SRT)

**Patient Orientation:**

recumbent (F-10450, SRT)

Concept Modifier: Patient Orientation Modifier = supine (F-10340, SRT)

**Table Longitudinal Position:**

44.90000000000000 mm

**Table Lateral Position:**

1681.4 mm

**Table Head Tilt Angle:**

0 deg

**Table Cradle Tilt Angle:**

0 deg

**Target Region:**

Abdomen (T-D400, SRT)

**Number of Frames:**

81 1

**SubImages per Frame:**

1 1

**Wedges and Shutters****Bottom Shutter:**

128.5 mm

**Left Shutter:**

144 mm

**Right Shutter:**

144 mm

**Top Shutter:**

128.5 mm

**Beam Position****Longitudinal Beam Position:**

1183 mm

**Beam Angle:**

0 deg

**Table Height Position:**

885 mm

**Irradiation Event X-Ray Data**

Concept Modifier: Acquisition Plane = Single Plane (113622, DCM)

**DateTime Started:**

2014-03-13 17:00:56

**Irradiation Event Type:**

Stationary Acquisition (113611, DCM)

**Reference Point Definition:**

15cm below BeamIsocenter

**Acquired Image:**

[XA image](#)

**Irradiation Event UID:**

1.3.46.670589.28.961600801528.20140313170055427.1

**Dose Area Product:**

5.2589410293E-05 Gy.m2

**Dose (RP):**

0.00170110192837 Gy

**Positioner Primary Angle:**

-0.4 deg

**Positioner Secondary Angle:**

0.1 deg

**X-Ray Filters****X-Ray Filter Type:**

Strip filter (113650, DCM)

**X-Ray Filter Material:**

Copper or Copper compound (C-127F9, SRT)

**X-Ray Filter Thickness Minimum:**

0.1 mm

**X-Ray Filter Thickness Maximum:**

0.1 mm



## **X-Ray Filters**

**X-Ray Filter Type:**

Strip filter (113650, DCM)

**X-Ray Filter Material:**

Aluminum or Aluminum compound (C-120F9, SRT)

**X-Ray Filter Thickness Minimum:**

1 mm

**X-Ray Filter Thickness Maximum:**

1 mm

**X-Ray Tube Current:**

483.8 mA

**Distance Source to Isocenter:**

810 mm

**KVP:**

80 kV

**Pulse Width:**

63.2 ms

**Distance Source to Detector:**

1040 mm

**Irradiation Duration:**

0.063 s

**Patient Table Relationship:**

headfirst (F-10470, SRT)

**Patient Orientation:**

recumbent (F-10450, SRT)

Concept Modifier: Patient Orientation Modifier = supine (F-10340, SRT)

**Table Longitudinal Position:**

44.90000000000000 mm

**Table Lateral Position:**

1681.4 mm

**Table Head Tilt Angle:**

0 deg

**Table Cradle Tilt Angle:**

0 deg

**Target Region:**

Abdomen (T-D400, SRT)

**Number of Frames:**

1 1

**SubImages per Frame:**

1 1

## **Wedges and Shutters**

**Bottom Shutter:**

128.5 mm

**Left Shutter:**

144 mm

**Right Shutter:**

144 mm

**Top Shutter:**

128.5 mm

**Beam Position****Longitudinal Beam Position:**

1183 mm

**Beam Angle:**

0 deg

**Table Height Position:**

885 mm

**Irradiation Event X-Ray Data**

Concept Modifier: Acquisition Plane = Single Plane (113622, DCM)

**DateTime Started:**

2014-03-13 17:19:45

**Irradiation Event Type:**

Fluoroscopy (P5-06000, SRT)

**Reference Point Definition:**

15cm below BeamIsocenter

**Irradiation Event UID:**

1.3.46.670589.28.961600801528.20140313171944533.1

**Dose Area Product:**

3.9883962304E-05 Gy.m2

**Dose (RP):**

0.00113177226813 Gy

**Positioner Primary Angle:**

-0.4 deg

**Positioner Secondary Angle:**

0.1 deg

**X-Ray Filters****X-Ray Filter Type:**

Strip filter (113650, DCM)

**X-Ray Filter Material:**

Copper or Copper compound (C-127F9, SRT)

**X-Ray Filter Thickness Minimum:**

0.4 mm

**X-Ray Filter Thickness Maximum:**

0.4 mm

**X-Ray Filters****X-Ray Filter Type:**

Strip filter (113650, DCM)

**X-Ray Filter Material:**

Aluminum or Aluminum compound (C-120F9, SRT)

**X-Ray Filter Thickness Minimum:**

1 mm

**X-Ray Filter Thickness Maximum:**

1 mm

**Fluoro Mode:**

Pulsed (113631, DCM)

**Pulse Rate:**

15 {pulse}/s

**Number of Pulses:**

82 1

**X-Ray Tube Current:**

62.7 mA

**Distance Source to Isocenter:**

810 mm

**KVP:**

106.7 kV

**Pulse Width:**

4 ms

**Irradiation Duration:**

5.466 s

**Patient Table Relationship:**

headfirst (F-10470, SRT)

**Patient Orientation:**

recumbent (F-10450, SRT)

Concept Modifier: Patient Orientation Modifier = supine (F-10340, SRT)

**Table Longitudinal Position:**

44.9000000000000 mm

**Table Lateral Position:**

1681.4 mm

**Table Head Tilt Angle:**

0 deg

**Table Cradle Tilt Angle:**

0 deg

**Target Region:**

Abdomen (T-D400, SRT)

**Number of Frames:**

82 1

**SubImages per Frame:**

1 1

## Wedges and Shutters

**Bottom Shutter:**

127.5 mm

**Left Shutter:**

161.5 mm

**Right Shutter:**

161.5 mm

**Top Shutter:**

127.5 mm

**Beam Position**

**Longitudinal Beam Position:**

1183 mm

**Beam Angle:**

0 deg

**Table Height Position:**

879 mm

**Irradiation Event X-Ray Data**

Concept Modifier: Acquisition Plane = Single Plane (113622, DCM)

**DateTime Started:**

2014-03-13 17:20:13

**Irradiation Event Type:**

Fluoroscopy (P5-06000, SRT)

**Reference Point Definition:**

15cm below BeamIsocenter

**Irradiation Event UID:**

1.3.46.670589.28.961600801528.20140313172012548.1

**Dose Area Product:**

5.9474290653E-05 Gy.m2

**Dose (RP):**

0.00172405876951 Gy

**Positioner Primary Angle:**

-86.100000000000 deg

**Positioner Secondary Angle:**

-0.1 deg

**X-Ray Filters**

**X-Ray Filter Type:**

Strip filter (113650, DCM)

**X-Ray Filter Material:**

Copper or Copper compound (C-127F9, SRT)

**X-Ray Filter Thickness Minimum:**

0.4 mm

**X-Ray Filter Thickness Maximum:**

0.4 mm

**X-Ray Filters**

**X-Ray Filter Type:**

Strip filter (113650, DCM)

**X-Ray Filter Material:**

Aluminum or Aluminum compound (C-120F9, SRT)

**X-Ray Filter Thickness Minimum:**

1 mm

**X-Ray Filter Thickness Maximum:**

1 mm

**Fluoro Mode:**

Pulsed (113631, DCM)

**Pulse Rate:**

15 {pulse}/s

**Number of Pulses:**

90 1

**X-Ray Tube Current:**

58.4 mA

**Distance Source to Isocenter:**

810 mm

**KVP:**

120 kV

**Pulse Width:**

4 ms

**Irradiation Duration:**

5.999 s

**Patient Table Relationship:**

headfirst (F-10470, SRT)

**Patient Orientation:**

recumbent (F-10450, SRT)

Concept Modifier: Patient Orientation Modifier = supine (F-10340, SRT)

**Table Longitudinal Position:**

41.9 mm

**Table Lateral Position:**

1696.4 mm

**Table Head Tilt Angle:**

0 deg

**Table Cradle Tilt Angle:**

0 deg

**Target Region:**

Abdomen (T-D400, SRT)

**Number of Frames:**

90 1

**SubImages per Frame:**

1 1

**Wedges and Shutters****Bottom Shutter:**

125.5 mm

**Left Shutter:**

158.5 mm

**Right Shutter:**

158.5 mm

**Top Shutter:**

125.5 mm

**Beam Position****Longitudinal Beam Position:**

1183 mm

**Beam Angle:**

0 deg

**Table Height Position:**

879 mm

**Irradiation Event X-Ray Data**

Concept Modifier: Acquisition Plane = Single Plane (113622, DCM)

**DateTime Started:**

2014-03-13 17:21:11

**Irradiation Event Type:**

Rotational Acquisition (113613, DCM)

**Reference Point Definition:**

15cm below BeamIsocenter

**Acquired Image:**[XA image](#)**Irradiation Event UID:**

1.3.46.670589.28.961600801528.20140313172111064.1

**Dose Area Product:**

0.00180808943793 Gy.m2

**Dose (RP):**

0.05277089072543 Gy

**Positioner Primary Angle:**

55.1 deg

**Positioner Secondary Angle:**

0.08 deg

**X-Ray Filters****X-Ray Filter Type:**

Strip filter (113650, DCM)

**X-Ray Filter Material:**

Copper or Copper compound (C-127F9, SRT)

**X-Ray Filter Thickness Minimum:**

0.4 mm

**X-Ray Filter Thickness Maximum:**

0.4 mm

## **X-Ray Filters**

**X-Ray Filter Type:**

Strip filter (113650, DCM)

**X-Ray Filter Material:**

Aluminum or Aluminum compound (C-120F9, SRT)

**X-Ray Filter Thickness Minimum:**

1 mm

**X-Ray Filter Thickness Maximum:**

1 mm

**X-Ray Tube Current:**

239.8 mA

**Distance Source to Isocenter:**

810 mm

**KVP:**

120.95 kV

**Pulse Width:**

5.8 ms

**Distance Source to Detector:**

1195 mm

**Irradiation Duration:**

5.199 s

**Patient Table Relationship:**

headfirst (F-10470, SRT)

**Patient Orientation:**

recumbent (F-10450, SRT)

Concept Modifier: Patient Orientation Modifier = supine (F-10340, SRT)

**Table Longitudinal Position:**

41.9 mm

**Table Lateral Position:**

1696.4 mm

**Table Head Tilt Angle:**

0 deg

**Table Cradle Tilt Angle:**

0 deg

**Target Region:**

Abdomen (T-D400, SRT)

**Number of Frames:**

312 1

**SubImages per Frame:**

1 1

## **Wedges and Shutters**

**Bottom Shutter:**

125.5 mm

**Left Shutter:**

158.5 mm

**Right Shutter:**

158.5 mm

**Top Shutter:**

125.5 mm

**Beam Position****Longitudinal Beam Position:**

1183 mm

**Beam Angle:**

0 deg

**Table Height Position:**

889 mm

**Comment:**

X-Ray Radiation Dose Structured Report related to the Performed Procedure Step

**Source of Dose Information:**

Computed From Image Attributes (113867, DCM)

# Annex

## [Annex 1](#)

**Procedure reported:**

Projection X-Ray (113704, DCM)

Concept Modifier: Has Intent = Combined Diagnostic and Therapeutic Procedure (R-002E9, SRT)

## [Annex 2](#)

**Scope of Accumulation:**

Performed Procedure Step (113016, DCM)

Properties: Performed Procedure Step SOP Instance UID =

1.3.46.670589.28.96160080152820140314122047429150
