# Supplementary material for: A new angiographic imaging platform reduces radiation exposure for patients with liver cancer treated with transarterial chemoembolization
Source: PubMed Central journal article supplement — Eur Radiol. 2015 May 9;25(11):3255–62. doi: 10.1007/s00330-015-3717-0 (PMC4595540; doi:10.1007/s00330-015-3717-0), 2015-05-09
Supplement: 330_2015_3717_MOESM2_ESM.pdf [file 330_2015_3717_MOESM2_ESM.pdf]

**Patient's name:**

**Exam. date and time:**

**Examination**

Cumulative fluoroscopy time: 16.8 min

Cumulative DAP (fluoroscopy): 61,766 mGycm<sup>2</sup>

Cumulative DAP (exposure): 100,805 mGycm<sup>2</sup>

-----

Total DAP: 162,571 mGycm<sup>2</sup>

Cumulative Air Kerma: 412.25 mGy

Total number of acquired runs: 10

Total number of acquired images: 1,189

Total number of acquired exposure images: 1,029

| Run no. | Procedure                   | Time hh:mm | Speed fr/sec | kV  | mA mAs | ms | Rotation | Angulation | SID [cm] | No. of images |
|---------|-----------------------------|------------|--------------|-----|--------|----|----------|------------|----------|---------------|
| 1       | Abdomen Frontal<br>3 fps    | 9:14 AM    | 3            | 80  | 14     |    | 0        | 0          | 103      | 32            |
| 2       | Fluoroscopy                 | 9:16 AM    | 15           | 71  | 10     |    | 0        | 0          | 103      | 56            |
| 3       | Abdomen Frontal<br>3 fps    | 9:18 AM    | 3            | 80  | 14     |    | 0        | 0          | 103      | 29            |
| 4       | Fluoroscopy                 | 9:29 AM    | 15           | 74  | 11     |    | 0        | 0          | 103      | 60            |
| 5       | Abdomen Frontal<br>3 fps    | 9:31 AM    | 3            | 80  | 20     |    | 0        | 0          | 103      | 31            |
| 6       | DualPhase<br>XperCT HQ Open | 9:34 AM    | 60           | 118 | 124    | 5  | LAO 40   | 0          | 120      | 312           |
| 7       | DualPhase<br>XperCT HQ Open | 9:35 AM    | 60           | 118 | 127    | 5  | LAO 40   | 0          | 120      | 312           |
| 8       | Abdomen Frontal<br>3 fps    | 10:00 AM   | 3            | 80  | 24     |    | RAO 1    | 0          | 106      | 1             |
| 9       | Fluoroscopy                 | 10:02 AM   | 15           | 76  | 14     |    | RAO 28   | 0          | 106      | 44            |
| 10      | XperCT HQ Open              | 10:04 AM   | 60           | 118 | 126    | 5  | LAO 40   | 0          | 120      | 312           |
